# Supplementary material for: Sumoylation of the human histone H4 tail inhibits p300-mediated transcription by RNA polymerase II in cellular extracts
Source: eLife. 2021 Nov 8;10:e67952. doi: 10.7554/eLife.67952 (PMC8626089; doi:10.7554/eLife.67952)
Supplement: Figure 3—source data 1. [file elife-67952-fig3-data1.xlsx]

## Sheet: wtH4 2ac list
SPECTRUM - MS						SPECTRUM - MS							215.245	0.0241047	fragment ion					Species	Ion	% total intensity		Avg. ratio
Leonen-H4-Chromatin-MSMS.RAW						Leonen-H4-Chromatin-MSMS.RAW							221.896	0.0211434						K5,8ac	b5	1.316	1.654	12.2
ITMS + c NSI d Full ms2 761.81@cid35.00 [195.00-2000.00]						ITMS + c NSI d Full ms2 762.19@cid35.00 [195.00-2000.00]							230.241	0.0488679						K5,8pr		0.072	0.253
Scan #: 4086		SUM				Scan #: 4156		SUM					241.124	0.0189926						K12,16ac	y9	0.042	0.306	0.4
RT: 29.22		18185.5				RT: 29.64		13279.6					242.074	0.0211254						K12,16pr		3.176	0.971
Data points: 496						Data points: 455							245.291	0.0520669
Mass	Intensity	Normalized intensity				Mass	Intensity	Normalized intensity					246.04	0.0627197
215.245	4.38356	0.0241047				221.896	2.80777	0.0211434					248.044	0.00847925
230.241	8.8869	0.0488679				242.074	2.80538	0.0211254					251.996	0.0227044
241.124	3.45391	0.0189926				246.04	8.32895	0.0627197					253.176	0.0230529
245.291	9.46865	0.0520669				251.996	3.01507	0.0227044					256.237	0.0161017
248.044	1.542	0.00847925				256.237	2.13824	0.0161017					259.033	0.0354918
253.176	4.19229	0.0230529				259.033	4.71319	0.0354918					260.877	0.0297444
262.051	9.52505	0.052377				260.877	3.94995	0.0297444					261.738	0.0250699
271.909	4.44102	0.0244206				261.738	3.32919	0.0250699					262.051	0.052377
283.987	26.6952	0.146794				263.225	8.59587	0.0647296					263.225	0.0647296
285.338	17.8348	0.0980714				266.164	2.82395	0.0212652					266.164	0.0212652
286.564	8.34282	0.0458761				283.983	25.6844	0.193412					271.909	0.0244206
296.387	12.4145	0.0682659				285.28	8.98213	0.0676383					283.983	0.193412	b2
298.145	8.95386	0.0492361				286.499	4.61953	0.0347865					283.987	0.146794	b2
299.518	8.40009	0.046191				288.155	4.08831	0.0307863					285.28	0.0676383
300.299	6.57335	0.036146				289.281	5.83598	0.0439468					285.338	0.0980714
301.269	6.91946	0.0380493				295.248	1.57381	0.0118513					286.499	0.0347865
302.266	12.4964	0.0687159				297.304	4.60029	0.0346416					286.564	0.0458761
307.599	6.57044	0.03613				298.235	4.29621	0.0323518					288.155	0.0307863
314.236	10.2946	0.0566089				300.426	26.6036	0.200334					289.281	0.0439468
316.108	2.87381	0.0158027				312.865	3.13077	0.0235757					295.248	0.0118513
319.134	14.4189	0.0792878				314.824	5.64412	0.042502					296.387	0.0682659
320.141	15.2034	0.0836014				319.361	8.64603	0.0651074					297.304	0.0346416
323.137	15.7645	0.0866871				320.258	3.30427	0.0248822					298.145	0.0492361	b2
324.119	13.2727	0.0729849				324.279	8.49182	0.0639461					298.235	0.0323518	b2
325.463	5.5532	0.0305363				328.896	6.6693	0.050222					299.518	0.046191
330.769	9.33244	0.0513179				330.032	7.93808	0.0597763					300.299	0.036146
332.052	12.8257	0.0705267				332.351	7.58937	0.0571504					300.426	0.200334
335.235	8.68702	0.0477688				340.963	49.0025	0.369005					301.269	0.0380493
337.1	3.59539	0.0197706				341.675	5.416	0.0407842					302.266	0.0687159
341.204	109.343	0.601265				344.102	9.75105	0.0734285					307.599	0.03613
342.375	9.01346	0.0495639				350.075	10.2778	0.0773953					312.865	0.0235757
348.21	8.00917	0.0440414				359.197	79.0253	0.595086					314.236	0.0566089
351.108	3.05543	0.0168014				359.968	12.9363	0.0974145					314.824	0.042502
359.336	226.506	1.24553				366.361	11.0468	0.0831863					316.108	0.0158027
360.332	1.90714	0.0104871				367.791	3.68735	0.0277669					319.134	0.0792878
361.162	4.80576	0.0264263				372.314	12.787	0.0962905					319.361	0.0651074
362.028	2.44514	0.0134455				378.199	1.67078	0.0125815					320.141	0.0836014
363.164	10.6076	0.0583299				382.194	1.717	0.0129295					320.258	0.0248822
367.186	11.6712	0.0641786				384.171	13.8476	0.104277					323.137	0.0866871
368.912	5.54749	0.030505				392.549	8.30092	0.0625086					324.119	0.0729849
376.224	37.3925	0.205617				396.243	2.57126	0.0193624					324.279	0.0639461
380.205	1.36115	0.00748476				397.425	13.6417	0.102726					325.463	0.0305363
389.559	6.30771	0.0346853				398.029	10.7216	0.0807372					328.896	0.050222
397.002	31.1133	0.171088				400.291	1.67225	0.0125926					330.032	0.0597763
398.109	90.835	0.49949				401.221	5.14125	0.0387152					330.769	0.0513179
399.63	13.9089	0.0764833				406.093	9.21981	0.0694281					332.052	0.0705267
401.276	19.839	0.109092				407.254	24.0913	0.181415					332.351	0.0571504
407.2	35.0684	0.192837				410.179	5.11524	0.0385194					335.235	0.0477688
411.624	30.1646	0.165871				413.732	3.13396	0.0235997					337.1	0.0197706
412.314	19.5685	0.107605				415.274	42.8242	0.32248					340.963	0.369005	b3
413.207	22.8819	0.125825				416.218	11.1761	0.0841592					341.204	0.601265	b3
415.107	111.51	0.613179				420.879	6.02572	0.0453756					341.675	0.0407842
417.211	17.8278	0.0980327				426.346	5.79097	0.0436079					342.375	0.0495639
428.88	9.94301	0.0546753				430.339	24.8806	0.187359					344.102	0.0734285
430.327	54.3402	0.29881				431.094	3.05234	0.0229851					348.21	0.0440414
433.162	2.44087	0.013422				431.753	10.4337	0.0785692					350.075	0.0773953
441.341	11.9546	0.0657366				435.252	23.6166	0.177841					351.108	0.0168014
443.856	2.25819	0.0124175				443.157	5.59064	0.0420993					359.197	0.595086	y2
448.334	3.61121	0.0198576				444.194	6.92649	0.0521587					359.336	1.24553	y2
450.011	3.07001	0.0168816				448.877	17.4578	0.131463					359.968	0.0974145
455.458	6.58877	0.0362308				455.057	18.2624	0.137522					360.332	0.0104871
457.021	7.76006	0.0426716				456.379	8.61161	0.0648482					361.162	0.0264263
462.166	16.9812	0.0933776				457.145	14.903	0.112224					362.028	0.0134455
463.168	8.55102	0.047021				462.285	14.3443	0.108018					363.164	0.0583299
466.044	16.6059	0.0913137				463.091	9.98467	0.0751878					366.361	0.0831863
466.898	20.3275	0.111778				470.104	3.56194	0.0268225					367.186	0.0641786
468.396	14.8118	0.0814482				472.198	4.2085	0.0316914					367.791	0.0277669
469.236	11.2634	0.0619358				474.696	5.63897	0.0424633					368.912	0.030505
470.009	11.2551	0.0618902				477.406	7.42486	0.0559116					372.314	0.0962905
474.448	6.9762	0.0383612				482.137	12.2896	0.0925446					376.224	0.205617
475.319	11.2625	0.0619312				483.922	27.1929	0.204771					378.199	0.0125815
476.523	8.0784	0.0444221				485.704	9.84989	0.0741728					380.205	0.00748476
477.705	7.00051	0.0384949				487.293	112.271	0.845436					382.194	0.0129295
480.787	18.9672	0.104298				488.572	18.8151	0.141684					384.171	0.104277
481.402	14.5015	0.0797421				490.207	4.7579	0.0358285					389.559	0.0346853
486.587	26.8195	0.147477				492.226	8.32995	0.0627272					392.549	0.0625086
487.236	187.184	1.0293				493.092	6.87274	0.0517539					396.243	0.0193624
488.058	7.65851	0.0421132				494.117	15.0974	0.113688					397.002	0.171088
489.866	4.14511	0.0227934				496.248	13.4405	0.101211					397.425	0.102726
492.22	5.35639	0.0294541				498.138	2.94758	0.0221962					398.029	0.0807372	b4
494.405	8.55577	0.0470471				499.202	2.77855	0.0209234					398.109	0.49949	b4
497.415	12.8168	0.0704781				500.246	11.1269	0.0837892					399.63	0.0764833
498.973	3.71968	0.0204541				501.261	37.5888	0.283055					400.291	0.0125926
502.13	38.7001	0.212807				502.344	11.0911	0.0835194					401.221	0.0387152
503.481	19.0182	0.104579				504.169	4.7458	0.0357374					401.276	0.109092
506.605	9.80532	0.0539182				505.966	6.88287	0.0518302					406.093	0.0694281
507.981	28.2733	0.155471				508.113	16.4903	0.124177					407.2	0.192837
510.698	2.8972	0.0159313				509.586	13.2007	0.0994056					407.254	0.181415
512.332	32.9543	0.181211				516.266	27.6883	0.208502					410.179	0.0385194
515.25	5.74938	0.0316151				517.313	9.73268	0.0732902					411.624	0.165871
520.215	10.4647	0.0575441				520.183	36.0019	0.271106					412.314	0.107605
525.266	5.43722	0.0298986				521.003	28.4611	0.214321					413.207	0.125825
526.262	28.329	0.155778				522.497	6.49201	0.0488869					413.732	0.0235997
527.146	7.93233	0.0436189				523.481	12.2673	0.0923765					415.107	0.613179
529.319	5.60442	0.030818				525.22	1.78717	0.013458					415.274	0.32248
530.284	22.5115	0.123788				526.234	5.70569	0.0429657					416.218	0.0841592
531.328	7.74766	0.0426034				527.209	6.68901	0.0503704					417.211	0.0980327
532.778	28.679	0.157702				528.252	4.04959	0.0304947					420.879	0.0453756
533.411	12.2927	0.0675958				530.445	12.8861	0.0970367					426.346	0.0436079
536.487	29.2737	0.160972				534.697	28.5497	0.214989					428.88	0.0546753
537.345	3.12206	0.0171678				539.91	38.1906	0.287588					430.327	0.29881	y3
538.183	5.19421	0.0285623				541.342	6.12241	0.0461037					430.339	0.187359	y3
539.384	24.791	0.136322				542.399	4.80462	0.0361803					431.094	0.0229851
542.143	22.1384	0.121736				544.195	607.533	4.57492					431.753	0.0785692
544.304	891.329	4.90131				545.229	92.7283	0.698274					433.162	0.013422
545.232	13.3153	0.0732191				547.918	9.24558	0.0696222					435.252	0.177841
547.568	27.9242	0.153552				550.384	19.5243	0.147024					441.341	0.0657366
550.183	29.9589	0.16474				551.38	3.26421	0.0245805					443.157	0.0420993
551.272	10.7915	0.0593408				553.687	18.3667	0.138307					443.856	0.0124175
552.378	19.0471	0.104738				555.049	12.45	0.0937528					444.194	0.0521587
553.691	2.64261	0.0145314				556.257	33.0606	0.248957					448.334	0.0198576
555.217	66.1754	0.36389				561.472	22.4058	0.168723					448.877	0.131463
556.838	3.20912	0.0176466				562.499	5.14796	0.0387658					450.011	0.0168816
561.268	58.0937	0.31945				568.241	219.687	1.65432					455.057	0.137522
563.447	35.5048	0.195237				569.422	22.7074	0.170994					455.458	0.0362308
564.466	13.2711	0.0729762				570.437	2.2581	0.0170042					456.379	0.0648482
565.365	12.0363	0.0661862				575.788	49.9516	0.376151					457.021	0.0426716
567.458	15.7438	0.0865733				578.09	36.2336	0.272851					457.145	0.112224
568.131	239.317	1.31598				579.315	3.62405	0.0272903					462.166	0.0933776
569.155	6.36027	0.0349743				582.169	25.2508	0.190146					462.285	0.108018
570.322	14.6969	0.0808162				582.965	2.28472	0.0172047					463.091	0.0751878
571.099	6.08824	0.0334785				584.074	32.1466	0.242074					463.168	0.047021
572.499	10.5317	0.0579127				584.695	5.75098	0.0433067					466.044	0.0913137
574.2	5.4013	0.029701				586.813	8.25155	0.0621368					466.898	0.111778
574.896	6.69304	0.0368042				587.492	34.2422	0.257855					468.396	0.0814482
576.389	15.155	0.0833356				588.963	18.1817	0.136914					469.236	0.0619358
578.022	19.2281	0.105733				591.105	21.5769	0.162481					470.009	0.0618902
581.478	9.26166	0.0509287				591.921	48.6738	0.366529					470.104	0.0268225
582.53	17.4086	0.0957278				593.281	3.61063	0.0271892					472.198	0.0316914
585.017	12.477	0.0686095				595.01	22.9721	0.172987					474.448	0.0383612
586.168	18.9066	0.103965				595.895	33.5608	0.252723					474.696	0.0424633
587.28	5.8585	0.0322152				599.104	31.1853	0.234835					475.319	0.0619312
587.904	11.2648	0.0619437				599.881	11.2443	0.0846731					476.523	0.0444221
589.135	3.78517	0.0208142				601.019	18.5619	0.139777					477.406	0.0559116
590.285	4.68312	0.0257519				602.439	33.2705	0.250538					477.705	0.0384949
591.686	18.0085	0.0990266				603.863	14.9773	0.112784					480.787	0.104298
593.011	13.8139	0.0759609				605.245	5.19982	0.0391563					481.402	0.0797421
594.192	8.66596	0.047653				607.245	9.85408	0.0742044					482.137	0.0925446
595.173	16.9914	0.0934334				608.161	6.70737	0.0505087					483.922	0.204771
596.836	13.0726	0.0718844				609.661	5.0081	0.0377126					485.704	0.0741728
598.338	20.1777	0.110954				611.527	13.5919	0.102351					486.587	0.147477
599.551	41.1397	0.226222				613.344	57.266	0.431232					487.236	1.0293	y4
600.211	24.8117	0.136436				616.098	8.54719	0.0643631					487.293	0.845436	y4
602.383	14.8276	0.0815353				617.294	16.402	0.123512					488.058	0.0421132
604.197	26.2161	0.144159				618.625	16.2766	0.122568					488.572	0.141684
605.244	17.063	0.0938271				620.315	70.1377	0.528159					489.866	0.0227934
607.068	27.8069	0.152907				620.977	56.3694	0.42448					490.207	0.0358285
607.703	40.4965	0.222685				625.025	203.558	1.53286					492.22	0.0294541
609.377	21.5231	0.118353				626.178	23.2138	0.174807					492.226	0.0627272
610.246	2.77014	0.0152326				627.069	21.0757	0.158707					493.092	0.0517539
611.356	15.0915	0.0829863				627.783	7.82902	0.058955					494.117	0.113688
613.301	31.065	0.170823				628.789	2.76539	0.0208243					494.405	0.0470471
614.501	50.9353	0.280087				630.098	13.3964	0.100879					496.248	0.101211
615.207	14.0731	0.077386				630.9	12.022	0.0905294					497.415	0.0704781
618.116	34.7084	0.190857				631.946	26.4368	0.199077					498.138	0.0221962
620.298	256.884	1.41257				632.895	32.1238	0.241902					498.973	0.0204541
621.527	11.4592	0.0630128				633.77	6.23482	0.0469502					499.202	0.0209234
622.967	6.34152	0.0348712				634.919	9.34637	0.0703812					500.246	0.0837892
625.07	298.223	1.63989				636.294	20.6628	0.155597					501.261	0.283055
626.443	19.6932	0.10829				637.177	1.33846	0.010079					502.13	0.212807
629.117	13.876	0.0763023				638.398	22.8473	0.172047					502.344	0.0835194
632.271	37.6624	0.207101				639.16	28.2389	0.212648					503.481	0.104579
633.199	51.5096	0.283245				641.361	11.508	0.0866589					504.169	0.0357374
639.072	43.0631	0.236798				642.52	55.2164	0.415797					505.966	0.0518302
639.819	9.58529	0.0527083				644.178	2.87215	0.0216282					506.605	0.0539182
641.289	33.1918	0.182518				644.831	26.09	0.196466					507.981	0.155471
642.324	13.0186	0.0715875				648.441	1.88928	0.0142269					508.113	0.124177
643.909	3.65117	0.0200773				651.216	15.241	0.114769					509.586	0.0994056
645.164	18.9687	0.104306				653.078	19.5099	0.146916					510.698	0.0159313
647.584	24.2009	0.133078				655.153	49.6635	0.373982					512.332	0.181211
650.589	38.6446	0.212502				655.857	14.3151	0.107797					515.25	0.0316151
651.459	13.1074	0.0720758				656.554	11.4514	0.0862325					516.266	0.208502
652.184	9.03555	0.0496853				658.532	4.48245	0.0337543					517.313	0.0732902
655.182	32.93	0.181078				659.336	54.2825	0.408765					520.183	0.271106
656.183	37.2959	0.205085				660.234	9.12625	0.0687236					520.215	0.0575441
656.811	9.13126	0.0502116				664.44	82.0618	0.617952					521.003	0.214321
658.306	16.0571	0.0882958				665.303	13.2909	0.100085					522.497	0.0488869
659.354	18.065	0.0993374				666.435	42.9455	0.323394					523.481	0.0923765
660.274	8.13267	0.0447205				668.057	2.48048	0.0186788					525.22	0.013458
661.398	20.8556	0.114682				669.14	79.9858	0.602318					525.266	0.0298986
662.688	18.8847	0.103845				670.081	50.0951	0.377232					526.234	0.0429657
664.424	36.0857	0.198431				670.738	29.4489	0.22176					526.262	0.155778
665.067	6.55459	0.0360429				671.89	86.7466	0.65323					527.146	0.0436189
666.388	27.6813	0.152216				672.849	24.9405	0.18781					527.209	0.0503704
668.627	35.1748	0.193422				674.274	13.9639	0.105153					528.252	0.0304947
669.268	37.8593	0.208183				676.305	86.3791	0.650463					529.319	0.030818
670.179	13.6657	0.075146				677.487	9.67645	0.0728668					530.284	0.123788	y5
671.067	6.93352	0.0381266				678.22	14.9209	0.112359					530.445	0.0970367	y5
674.134	4.65455	0.0255948				681.505	9.93817	0.0748376					531.328	0.0426034
675.306	9.02647	0.0496354				683.818	28.5539	0.21502					532.778	0.157702
675.97	3.85878	0.0212189				684.565	8.56675	0.0645104					533.411	0.0675958
677.768	4.01617	0.0220844				686.141	68.1523	0.513208					534.697	0.214989
678.84	26.9712	0.148311				687.099	190.616	1.4354					536.487	0.160972
679.478	9.96419	0.0547918				688.34	138.696	1.04442					537.345	0.0171678
681.032	42.9665	0.236267				689.397	56.2143	0.423312					538.183	0.0285623
682.175	8.29252	0.0455995				690.146	5.33175	0.0401498					539.384	0.136322
683.448	13.6839	0.0752458				691.189	8.23201	0.0619897					539.91	0.287588
685.515	23.1294	0.127186				692.229	8.46511	0.063745					541.342	0.0461037
687.096	146.462	0.805375				693.59	16.1337	0.121492					542.143	0.121736
688.166	78.3222	0.430684				696.25	9.96929	0.0750719					542.399	0.0361803
689.951	71.7245	0.394404				697.288	34.9369	0.263086					544.195	4.57492	y5
691.438	26.6387	0.146483				698.693	7.38179	0.0555872					544.304	4.90131	y5
693.784	21.81	0.11993				699.411	39.0144	0.293791					545.229	0.698274
695.354	1.93986	0.0106671				700.148	25.0172	0.188388					545.232	0.0732191
696.859	5.35676	0.0294562				701.083	21.0359	0.158407					547.568	0.153552
698.019	23.1995	0.127571				702.065	11.5051	0.0866369					547.918	0.0696222
699.328	11.0106	0.0605457				703.396	28.0874	0.211507					550.183	0.16474
701.462	14.6567	0.0805953				704.749	57.0747	0.429791					550.384	0.147024
702.114	14.5595	0.0800607				705.383	91.2485	0.687131					551.272	0.0593408
703.496	19.7038	0.108349				706.099	104.576	0.787493					551.38	0.0245805
705.339	328.537	1.80658				708.121	36.2757	0.273167					552.378	0.104738
706.029	59.7259	0.328425				709.382	36.7235	0.27654					553.687	0.138307
707.304	32.2255	0.177204				710.064	34.7761	0.261875					553.691	0.0145314
708.277	15.5941	0.0857501				710.67	44.2862	0.333489					555.049	0.0937528
708.894	42.4997	0.2337				711.31	10.1665	0.0765573					555.217	0.36389
710.127	59.1174	0.325079				714.295	59.006	0.444334					556.257	0.248957
711.525	37.2373	0.204763				715.187	48.1487	0.362575					556.838	0.0176466
712.949	8.99111	0.049441				716.143	21.634	0.162911					561.268	0.31945
713.888	33.9458	0.186664				717.52	43.8136	0.329931					561.472	0.168723
715.172	128.323	0.705632				718.419	17.8597	0.134489					562.499	0.0387658
716.067	112.698	0.619712				719.453	10.9268	0.0822821					563.447	0.195237
717.233	9.17882	0.0504732				720.275	46.6402	0.351216					564.466	0.0729762
718.124	4.25552	0.0234006				721.215	18.291	0.137737					565.365	0.0661862
719.446	37.5648	0.206564				722.472	15.4939	0.116674					567.458	0.0865733
720.483	23.9338	0.131609				724.088	127.24	0.958157					568.131	1.31598	b5	K5,8ac
721.198	8.70056	0.0478433				724.9	74.6772	0.562343					568.241	1.65432	b5	K5,8ac
723.96	231.102	1.2708				726.013	137.032	1.0319					569.155	0.0349743
724.81	94.2084	0.51804				727.144	20.9972	0.158115					569.422	0.170994
725.539	85.3719	0.469449				728.313	65.2944	0.491688					570.322	0.0808162
726.171	27.9259	0.153561				729.212	63.8023	0.480452					570.437	0.0170042
727.221	21.1871	0.116505				729.857	18.1163	0.136422					571.099	0.0334785
728.443	151.663	0.833977				731.241	30.4628	0.229395					572.499	0.0579127
729.452	39.6348	0.217947				732.091	41.0595	0.309191					574.2	0.029701
730.624	47.5742	0.261605				733.098	84.7033	0.637843					574.896	0.0368042
731.309	11.5979	0.0637756				734.035	16.4931	0.124198					575.788	0.376151
732.879	124.435	0.684255				734.8	61.5631	0.46359					576.389	0.0833356
733.867	59.6891	0.328223				735.459	77.9218	0.586776					578.022	0.105733
734.54	31.0028	0.17048				736.732	53.6714	0.404163					578.09	0.272851
735.668	22.7053	0.124853				738.159	348.162	2.62177					579.315	0.0272903
736.902	70.619	0.388325				739.258	129.304	0.9737					581.478	0.0509287
738.175	590.386	3.24646				740.152	6.62551	0.0498922					582.169	0.190146	b5
738.9	39.2202	0.215667				740.97	44.1447	0.332424					582.53	0.0957278	b5
739.892	37.5285	0.206365				742.268	81.5133	0.613821					582.965	0.0172047
741.43	91.3533	0.50234				743.405	254.907	1.91953					584.074	0.242074
742.509	130.929	0.71996				744.271	232.604	1.75158					584.695	0.0433067
743.241	249.094	1.36974				745.257	69.9547	0.526781					585.017	0.0686095
744.066	443.995	2.44147				746.658	35.8188	0.269727					586.168	0.103965
745.365	55.1925	0.303496				748.092	50.8587	0.382982					586.813	0.0621368
746.189	118.507	0.651656				749.081	62.4157	0.47001					587.28	0.0322152
746.851	22.5126	0.123794				750.299	32.5144	0.244844					587.492	0.257855
747.523	16.8263	0.0925256				751.787	163.861	1.23392					587.904	0.0619437
748.437	23.9444	0.131667				752.779	260.01	1.95796					588.963	0.136914
749.151	38.049	0.209226				753.479	76.081	0.572914					589.135	0.0208142
750.021	22.5333	0.123908				754.716	19.6474	0.147951					590.285	0.0257519
751.922	499.755	2.74809				760.19	8.01593	0.0603625					591.105	0.162481
752.97	344.523	1.89449				760.91	4.64718	0.0349948					591.686	0.0990266
753.612	51.2334	0.281726				762.784	14.2883	0.107595					591.921	0.366529
755.856	10.0944	0.0555078				763.697	13.9425	0.104991					593.011	0.0759609
762.47	8.13345	0.0447248				771.385	1.74257	0.0131221					593.281	0.0271892
772.508	4.06957	0.022378				775.487	16.1666	0.12174					594.192	0.047653
773.598	11.2593	0.0619137				777.671	1.47912	0.0111383					595.01	0.172987
776.419	16.0036	0.088002				779.111	9.83166	0.0740355					595.173	0.0934334
777.237	7.70512	0.0423695				782.44	4.79801	0.0361306					595.895	0.252723	b5	K5,8pr
779.342	10.2093	0.0561399				785.38	475.591	3.58135					596.836	0.0718844	b5	K5,8pr
781.624	7.90189	0.0434515				786.456	99.324	0.747942					598.338	0.110954
784.032	10.9161	0.0600264				788.97	13.1489	0.0990153					599.104	0.234835
785.456	834.117	4.5867				792.385	13.3334	0.100405					599.551	0.226222
786.481	30.1482	0.165781				795.101	56.2139	0.423309					599.881	0.0846731
791.13	6.00856	0.0330403				796.119	10.4572	0.0787458					600.211	0.136436
791.8	3.54287	0.0194818				798.412	8.51952	0.0641547					601.019	0.139777
794.884	105.121	0.578048				800.496	12.144	0.0914481					602.383	0.0815353
795.552	33.9848	0.186878				802.331	12.7535	0.0960376					602.439	0.250538
798.449	11.8513	0.0651689				803.755	4.55479	0.034299					603.863	0.112784
800.393	16.979	0.0933655				807.319	1.54283	0.011618					604.197	0.144159
803.458	35.8954	0.197384				808.629	40.5788	0.305572					605.244	0.0938271
809.16	4.42315	0.0243224				809.637	15.1945	0.11442					605.245	0.0391563
811.797	23.2594	0.1279				810.483	8.26397	0.0622303					607.068	0.152907
812.465	74.1296	0.40763				812.206	94.3813	0.710721					607.245	0.0742044
813.53	26.016	0.143059				819.42	43.2805	0.325916					607.703	0.222685
815.549	3.24006	0.0178167				820.41	1.69303	0.0127491					608.161	0.0505087
817.139	17.5942	0.096748				821.127	8.65864	0.0652024					609.377	0.118353
821.024	4.85164	0.0266786				824.396	3.91386	0.0294726					609.661	0.0377126
827.408	18.8623	0.103722				826.517	38.1911	0.287591					610.246	0.0152326
831.612	21.0404	0.115698				827.408	3.06225	0.0230597					611.356	0.0829863
832.261	9.34285	0.0513752				828.219	20.3916	0.153556					611.527	0.102351
834.426	7.84063	0.0431146				831.647	29.7062	0.223697					613.301	0.170823
836.85	13.6584	0.0751059				832.696	13.5453	0.102001					613.344	0.431232
838.99	14.0401	0.077205				833.388	12.2515	0.092258					614.501	0.280087
842.486	3.48416	0.019159				837.567	18.9745	0.142884					615.207	0.077386
843.169	1.94357	0.0106875				838.379	14.2195	0.107077					616.098	0.0643631
846.64	17.7836	0.0977896				840.452	31.8882	0.240129					617.294	0.123512
848.232	32.5223	0.178836				842.947	6.47384	0.0487501					618.116	0.190857
849.762	10.0267	0.0551358				845.498	25.198	0.189749					618.625	0.122568
852.098	10.1002	0.0555396				846.481	46.6716	0.351452					620.298	1.41257
856.22	8.50317	0.0467579				849.628	10.9433	0.0824064					620.315	0.528159
857.981	28.2198	0.155177				850.76	50.9624	0.383764					620.977	0.42448
861.066	9.39017	0.0516354				851.382	28.6647	0.215854					621.527	0.0630128
863.357	24.3153	0.133707				852.957	29.9274	0.225363					622.967	0.0348712
866.411	24.8136	0.136447				856.163	4.2738	0.0321831					625.025	1.53286	b6
867.391	18.7657	0.10319				859.883	13.2811	0.100011					625.07	1.63989	b6
869.313	41.98	0.230843				862.082	25.3951	0.191233					626.178	0.174807
871.324	18.857	0.103692				866.346	1.83651	0.0138295					626.443	0.10829
873.216	28.1358	0.154715				867.125	5.35989	0.0403617					627.069	0.158707
875.457	14.1057	0.0775653				872.931	4.24893	0.0319958					627.783	0.058955
876.672	21.8028	0.119891				875.401	24.5623	0.184962					628.789	0.0208243
879.144	2.78135	0.0152943				876.903	13.5626	0.102131					629.117	0.0763023
880.25	16.5013	0.0907387				880.707	4.17262	0.0314211					630.098	0.100879
881.492	6.79941	0.0373891				881.752	3.58894	0.0270259					630.9	0.0905294
883.223	10.9043	0.0599614				884.328	3.65863	0.0275507					631.946	0.199077
884.303	5.11689	0.0281371				885.292	6.4062	0.0482408					632.271	0.207101
885.401	1.95324	0.0107406				885.932	10.6099	0.0798959					632.895	0.241902
887.259	19.3826	0.106582				890.075	3.40517	0.025642					633.199	0.283245
890.867	20.8632	0.114724				892.302	36.3454	0.273693					633.77	0.0469502
895.847	11.9304	0.0656038				893.552	5.36473	0.0403982					634.919	0.0703812
896.548	7.86478	0.0432474				895.066	12.7693	0.0961568					636.294	0.155597
897.487	32.0086	0.176011				897.075	17.1481	0.129131					637.177	0.010079
898.606	118.384	0.650977				898.582	68.8007	0.518091					638.398	0.172047
899.953	34.077	0.187385				899.595	8.16984	0.0615215					639.072	0.236798	b6
900.743	10.245	0.056336				901.317	7.49246	0.0564206					639.16	0.212648	b6
901.862	15.5162	0.0853216				904.623	22.3607	0.168383					639.819	0.0527083
904.093	23.9974	0.131959				905.482	8.99567	0.0677403					641.289	0.182518
906.176	11.0274	0.0606385				906.702	1.1272	0.00848819					641.361	0.0866589
907.713	26.0968	0.143503				907.989	12.4271	0.0935802					642.324	0.0715875
909.66	27.9155	0.153504				910.823	13.6928	0.103112					642.52	0.415797
913.138	19.7638	0.108679				920.219	44.7589	0.337049					643.909	0.0200773
914.505	9.95774	0.0547564				920.84	37.5706	0.282918					644.178	0.0216282
915.587	3.80203	0.0209069				921.75	25.9541	0.195443					644.831	0.196466
916.194	2.83254	0.0155758				922.446	16.5728	0.124798					645.164	0.104306
917.103	12.2984	0.0676272				923.477	15.6859	0.11812					647.584	0.133078
920.878	61.7843	0.339744				926.475	5.41368	0.0407667					648.441	0.0142269
922.399	4.45437	0.024494				928.087	40.6641	0.306214					650.589	0.212502
924.849	13.1763	0.072455				929.441	5.19878	0.0391484					651.216	0.114769
925.484	18.7688	0.103208				932.663	33.4157	0.251631					651.459	0.0720758
926.362	9.85482	0.0541904				936.32	16.5684	0.124765					652.184	0.0496853
927.535	7.55053	0.0415194				937.339	18.3223	0.137973					653.078	0.146916
928.437	90.7443	0.498991				938.442	21.4131	0.161248					655.153	0.373982
929.162	23.308	0.128168				939.818	14.6189	0.110085					655.182	0.181078
932.914	10.3664	0.0570034				941.376	1.50495	0.0113328					655.857	0.107797
935.723	23.6929	0.130284				942.703	28.9186	0.217766					656.183	0.205085
936.358	23.4792	0.129109				945.896	11.8549	0.0892715					656.554	0.0862325
937.633	39.3907	0.216605				948.642	29.1025	0.219151					656.811	0.0502116
938.771	15.372	0.0845285				954.414	35.1022	0.264331					658.306	0.0882958
939.685	45.025	0.247587				955.439	128.932	0.970901					658.532	0.0337543
940.549	24.9607	0.137256				956.309	98.4074	0.741039					659.336	0.408765
941.492	29.977	0.16484				958.218	45.4767	0.342454					659.354	0.0993374
942.244	176.634	0.97129				959.578	3.60302	0.0271319					660.234	0.0687236
943.346	11.0422	0.0607196				961.322	26.6845	0.200942					660.274	0.0447205
946.359	25.3474	0.139382				967.153	5.77154	0.0434616					661.398	0.114682
947.049	23.2776	0.128001				972.384	16.191	0.121924					662.688	0.103845
948.186	367.524	2.02097				973.862	11.7857	0.08875					664.424	0.198431
951.688	25.2884	0.139058				975.889	1.72368	0.0129799					664.44	0.617952
952.387	29.4279	0.16182				979.196	289.894	2.18299					665.067	0.0360429
954.319	3.2014	0.0176041				980.029	48.3421	0.364031					665.303	0.100085
955.49	577.637	3.17635				980.796	30.4017	0.228935					666.388	0.152216
956.248	23.8758	0.13129				984.429	99.6445	0.750355					666.435	0.323394
957.866	2.27591	0.012515				985.546	1.00689	0.0075822					668.057	0.0186788
961.249	37.9608	0.208741				986.418	14.2362	0.107203					668.627	0.193422
962.211	10.5303	0.0579046				988.18	30.011	0.225992					669.14	0.602318
965.591	11.7261	0.0644805				990.284	2.54242	0.0191452					669.268	0.208183
967.115	2.90131	0.0159539				993.016	3.73796	0.028148					670.081	0.377232
977.672	10.2568	0.0564008				993.93	13.1799	0.099249					670.179	0.075146
979.273	674.818	3.71074				995.383	9.88947	0.0744709					670.738	0.22176
982.667	15.0874	0.0829635				996.342	5.75874	0.0433652					671.067	0.0381266
983.328	19.3912	0.10663				999.403	14.0865	0.106076					671.89	0.65323
984.321	44.6838	0.245711				1003.67	10.7981	0.0813132					672.849	0.18781
985.476	22.1142	0.121603				1010.55	21.3508	0.160779					674.134	0.0255948
986.592	3.8618	0.0212355				1011.47	14.6589	0.110386					674.274	0.105153
987.811	19.2781	0.106008				1018.26	11.6207	0.0875074					675.306	0.0496354
989.12	15.2614	0.0839203				1019.59	3.30808	0.0249109					675.97	0.0212189
993.545	32.4213	0.178281				1025.17	24.9187	0.187645					676.305	0.650463
997.361	2.97121	0.0163383				1027.02	8.13198	0.0612364					677.487	0.0728668
998.082	21.3042	0.117149				1032.25	30.0125	0.226004					677.768	0.0220844
999.32	4.43539	0.0243897				1033.32	9.38703	0.0706873					678.22	0.112359
1001.41	11.1106	0.0610958				1034.32	11.5485	0.0869641					678.84	0.148311
1003.41	19.3897	0.106621				1036.06	97.0512	0.730827					679.478	0.0547918
1004.17	14.3974	0.0791694				1037.51	17.0313	0.128251					681.032	0.236267
1006.5	16.1419	0.0887623				1038.77	27.6986	0.208579					681.505	0.0748376
1007.64	6.60865	0.0363401				1041.74	36.2811	0.273209					682.175	0.0455995
1008.51	9.5391	0.0524543				1046.1	44.6066	0.335902					683.448	0.0752458
1010.5	2.23985	0.0123166				1049.14	14.7782	0.111285					683.818	0.21502
1012.27	37.9925	0.208916				1050.53	23.8126	0.179317					684.565	0.0645104
1015.5	16.4098	0.0902353				1051.44	16.2877	0.122652					685.515	0.127186
1017.02	33.1653	0.182372				1055.67	11.4621	0.0863135					686.141	0.513208
1018.68	30.4236	0.167295				1057.72	6.15312	0.046335					687.096	0.805375
1020.81	43.1443	0.237245				1061.34	11.2963	0.085065					687.099	1.4354
1022.11	7.81754	0.0429877				1063.52	15.5929	0.11742					688.166	0.430684
1023.9	22.4621	0.123516				1067.09	11.5644	0.0870838					688.34	1.04442
1024.97	8.3329	0.0458215				1068.59	31.762	0.239178					689.397	0.423312
1025.77	11.6455	0.0640373				1070.51	10.0726	0.0758497					689.951	0.394404
1029.68	17.0381	0.0936901				1072.12	8.09502	0.0609581					690.146	0.0401498
1032.17	41.1307	0.226172				1074.63	21.8983	0.164901					691.189	0.0619897
1033.51	17.9434	0.0986683				1090.24	8.76444	0.065999					691.438	0.146483
1034.32	29.894	0.164383				1093.47	47.2075	0.355488					692.229	0.063745
1035.24	16.789	0.0923206				1094.71	17.7767	0.133864					693.59	0.121492
1036.2	63.7245	0.350413				1103.42	7.16865	0.0539822					693.784	0.11993
1037.53	7.00839	0.0385383				1106.41	8.25848	0.062189					695.354	0.0106671
1039.29	6.1211	0.0336592				1107.6	10.8789	0.0819217					696.25	0.0750719
1040.3	14.1489	0.0778031				1118.77	7.26992	0.0547448					696.859	0.0294562
1044.02	9.12306	0.0501665				1125.41	23.5	0.176963					697.288	0.263086
1044.92	7.41241	0.0407599				1127.51	17.9575	0.135226					698.019	0.127571
1045.89	10.599	0.0582826				1131.58	29.1837	0.219763					698.693	0.0555872
1048.34	22.6308	0.124444				1146.6	5.35112	0.0402956					699.328	0.0605457
1049.56	18.8667	0.103746				1152.16	10.7071	0.0806281					699.411	0.293791
1050.81	75.1699	0.41335				1156.5	8.56904	0.0645276					700.148	0.188388
1051.61	11.4647	0.0630427				1158.68	5.93834	0.0447176					701.083	0.158407
1052.64	19.0754	0.104893				1160.57	11.2841	0.0849725					701.462	0.0805953
1053.69	8.7174	0.0479359				1164.29	61.7586	0.465062					702.065	0.0866369
1061.66	23.1975	0.12756				1165.24	27.5524	0.207479					702.114	0.0800607
1064.62	31.1197	0.171123				1165.87	13.3134	0.100254					703.396	0.211507
1065.27	27.8065	0.152904				1175.45	24.1733	0.182033					703.496	0.108349
1069.47	15.7675	0.0867037				1178.86	24.2277	0.182442					704.749	0.429791
1070.18	18.1029	0.0995457				1179.62	12.8398	0.0966876					705.339	1.80658
1071.35	12.2924	0.0675944				1180.74	18.8967	0.142298					705.383	0.687131
1073.38	10.8126	0.0594573				1181.46	28.2617	0.21282					706.029	0.328425
1075.16	29.0923	0.159975				1182.63	32.328	0.24344					706.099	0.787493
1079.61	9.659	0.0531136				1183.68	28.1675	0.21211					707.304	0.177204
1080.74	10.9159	0.0600251				1197.66	8.8608	0.0667247					708.121	0.273167
1081.48	14.4042	0.0792071				1208.75	2.53011	0.0190526					708.277	0.0857501
1086.8	8.63109	0.0474613				1210.47	7.55585	0.0568979					708.894	0.2337
1088.06	3.18523	0.0175152				1211.52	7.18811	0.0541288					709.382	0.27654
1090.5	8.82678	0.0485374				1217.35	25.5352	0.192288					710.064	0.261875
1092.85	7.06288	0.0388379				1221.88	10.4907	0.0789987					710.127	0.325079
1093.53	98.1035	0.539459				1229.38	5.34393	0.0402415					710.67	0.333489
1100.49	3.34218	0.0183782				1239.42	25.0916	0.188948					711.31	0.0765573
1103.61	6.95832	0.0382629				1240.08	3.80948	0.0286866					711.525	0.204763
1106.71	11.5228	0.0633625				1240.89	3.41886	0.0257451					712.949	0.049441
1111.49	19.9353	0.109622				1243.51	6.29714	0.0474195					713.888	0.186664
1118.64	47.1996	0.259545				1254.77	22.0739	0.166223					714.295	0.444334	y6
1122.53	5.85342	0.0321872				1255.46	1.92415	0.0144895					715.172	0.705632	y6
1125.6	55.9198	0.307496				1266.45	12.4195	0.0935228					715.187	0.362575
1127.25	17.8762	0.0982989				1271.49	6.45082	0.0485767					716.067	0.619712
1128.67	6.2084	0.0341392				1272.79	15.4653	0.116459					716.143	0.162911
1132.73	9.15946	0.0503667				1275.3	7.78887	0.0586527					717.233	0.0504732
1133.68	24.0064	0.132008				1276.29	7.18677	0.0541187					717.52	0.329931
1140.5	12.853	0.070677				1280.82	3.87028	0.0291445					718.124	0.0234006
1146.5	26.4287	0.145328				1285.35	15.2347	0.114722					718.419	0.134489
1153.33	1.82344	0.0100269				1318.97	14.2342	0.107188					719.446	0.206564
1155.35	14.7956	0.0813593				1327.39	77.2401	0.581643					719.453	0.0822821
1156.27	3.603	0.0198124				1328.45	92.309	0.695116					720.275	0.351216
1157.89	12.5371	0.0689397				1329.42	33.382	0.251377					720.483	0.131609
1164.3	166.46	0.915343				1330.83	6.3709	0.0479749					721.198	0.0478433
1167.45	32.1687	0.176891				1332.09	14.5901	0.109868					721.215	0.137737
1168.69	9.74975	0.0536126				1332.85	5.42914	0.0408831					722.472	0.116674
1178.41	5.08942	0.0279861				1339.7	11.2278	0.0845487					723.96	1.2708
1179.76	4.4536	0.0244898				1344.57	6.75782	0.0508885					724.088	0.958157
1181.39	12.8382	0.0705954				1348.49	173.67	1.30779					724.81	0.51804
1182.62	71.4731	0.393022				1349.58	44.2904	0.333521					724.9	0.562343
1186.47	2.61541	0.0143818				1350.52	6.30783	0.0474999					725.539	0.469449
1194.67	3.35224	0.0184336				1364.64	1.52375	0.0114743					726.013	1.0319
1196.94	5.29455	0.029114				1366.28	9.41986	0.0709346					726.171	0.153561
1203.2	4.32913	0.0238054				1367.68	6.82064	0.0513616					727.144	0.158115
1208.57	7.48961	0.0411844				1448.1	3.15775	0.0237788					727.221	0.116505
1210.65	3.80888	0.0209446				1483.23	12.785	0.0962749					728.313	0.491688	y6
1221.46	8.48661	0.0466668				1692.29	7.61137	0.0573161					728.443	0.833977	y6
1225.19	7.91898	0.0435455				1792.14	16.8334	0.126761					729.212	0.480452
1233.23	6.89539	0.0379169											729.452	0.217947
1233.85	9.58665	0.0527158											729.857	0.136422
1236.84	13.6844	0.0752489											730.624	0.261605
1239.6	172.486	0.948481											731.241	0.229395
1241.17	7.89251	0.0433999											731.309	0.0637756
1253.47	18.0759	0.099397											732.091	0.309191
1260.47	11.1279	0.0611908											732.879	0.684255
1261.1	3.96502	0.0218031											733.098	0.637843
1270.26	27.1271	0.149169											733.867	0.328223
1271.57	29.3093	0.161168											734.035	0.124198
1272.27	8.64957	0.0475629											734.54	0.17048
1273.11	19.8135	0.108952											734.8	0.46359
1279.51	16.6369	0.0914844											735.459	0.586776
1280.82	5.85097	0.0321737											735.668	0.124853
1289.25	10.8422	0.0596201											736.732	0.404163
1290.86	32.137	0.176717											736.902	0.388325
1301.85	7.24233	0.0398247											738.159	2.62177	b7
1310.15	7.67943	0.0422282											738.175	3.24646	b7
1310.9	4.86915	0.0267748											738.9	0.215667
1313.25	3.27937	0.0180329											739.258	0.9737
1327.02	32.5133	0.178786											739.892	0.206365
1327.64	128.264	0.705307											740.152	0.0498922
1328.64	100.196	0.550965											740.97	0.332424
1329.68	40.712	0.22387											741.43	0.50234
1330.6	38.4355	0.211352											742.268	0.613821
1335.04	4.30839	0.0236913											742.509	0.71996
1337.69	15.9778	0.08786											743.241	1.36974
1348.27	249.232	1.3705											743.405	1.91953
1349.77	7.0519	0.0387775											744.066	2.44147
1350.64	8.33069	0.0458094											744.271	1.75158
1353.4	6.1159	0.0336306											745.257	0.526781
1359.91	6.33944	0.0348598											745.365	0.303496
1373.64	8.592	0.0472463											746.189	0.651656
1384.59	2.77161	0.0152407											746.658	0.269727
1386.16	2.45888	0.0135211											746.851	0.123794
1409.38	6.47492	0.0356048											747.523	0.0925256
1435.4	9.17317	0.0504421											748.092	0.382982
1464.29	15.6515	0.0860654											748.437	0.131667
1494.37	19.8833	0.109336											749.081	0.47001
1667.11	4.3983	0.0241857											749.151	0.209226
1723.91	8.90689	0.0489779											750.021	0.123908
													750.299	0.244844
													751.787	1.23392	b7
													751.922	2.74809	b7
													752.779	1.95796
													752.97	1.89449
													753.479	0.572914
													753.612	0.281726
													754.716	0.147951
													755.856	0.0555078
													760.19	0.0603625
													760.91	0.0349948
													762.47	0.0447248
													762.784	0.107595
													763.697	0.104991
													771.385	0.0131221	y7
													772.508	0.022378	y7
													773.598	0.0619137
													775.487	0.12174
													776.419	0.088002
													777.237	0.0423695
													777.671	0.0111383
													779.111	0.0740355
													779.342	0.0561399
													781.624	0.0434515
													782.44	0.0361306
													784.032	0.0600264
													785.38	3.58135	y7
													785.456	4.5867	y7
													786.456	0.747942
													786.481	0.165781
													788.97	0.0990153
													791.13	0.0330403
													791.8	0.0194818
													792.385	0.100405
													794.884	0.578048	b8
													795.101	0.423309	b8
													795.552	0.186878
													796.119	0.0787458
													798.412	0.0641547
													798.449	0.0651689
													800.393	0.0933655
													800.496	0.0914481
													802.331	0.0960376
													803.458	0.197384
													803.755	0.034299
													807.319	0.011618
													808.629	0.305572
													809.16	0.0243224	b8
													809.637	0.11442	b8
													810.483	0.0622303
													811.797	0.1279
													812.206	0.710721
													812.465	0.40763
													813.53	0.143059
													815.549	0.0178167
													817.139	0.096748
													819.42	0.325916
													820.41	0.0127491
													821.024	0.0266786
													821.127	0.0652024
													824.396	0.0294726
													826.517	0.287591
													827.408	0.103722
													827.408	0.0230597
													828.219	0.153556
													831.612	0.115698
													831.647	0.223697
													832.261	0.0513752
													832.696	0.102001
													833.388	0.092258
													834.426	0.0431146
													836.85	0.0751059
													837.567	0.142884
													838.379	0.107077
													838.99	0.077205
													840.452	0.240129
													842.486	0.019159
													842.947	0.0487501
													843.169	0.0106875
													845.498	0.189749
													846.481	0.351452
													846.64	0.0977896
													848.232	0.178836
													849.628	0.0824064
													849.762	0.0551358
													850.76	0.383764
													851.382	0.215854
													852.098	0.0555396
													852.957	0.225363
													856.163	0.0321831
													856.22	0.0467579
													857.981	0.155177
													859.883	0.100011
													861.066	0.0516354
													862.082	0.191233
													863.357	0.133707
													866.346	0.0138295
													866.411	0.136447
													867.125	0.0403617
													867.391	0.10319
													869.313	0.230843
													871.324	0.103692
													872.931	0.0319958
													873.216	0.154715
													875.401	0.184962
													875.457	0.0775653
													876.672	0.119891
													876.903	0.102131
													879.144	0.0152943
													880.25	0.0907387
													880.707	0.0314211
													881.492	0.0373891
													881.752	0.0270259
													883.223	0.0599614
													884.303	0.0281371	y8
													884.328	0.0275507	y8
													885.292	0.0482408
													885.401	0.0107406
													885.932	0.0798959
													887.259	0.106582
													890.075	0.025642
													890.867	0.114724
													892.302	0.273693
													893.552	0.0403982
													895.066	0.0961568
													895.847	0.0656038
													896.548	0.0432474
													897.075	0.129131
													897.487	0.176011
													898.582	0.518091	y8
													898.606	0.650977	y8
													899.595	0.0615215
													899.953	0.187385
													900.743	0.056336
													901.317	0.0564206
													901.862	0.0853216
													904.093	0.131959
													904.623	0.168383
													905.482	0.0677403
													906.176	0.0606385
													906.702	0.00848819
													907.713	0.143503
													907.989	0.0935802
													909.66	0.153504
													910.823	0.103112
													913.138	0.108679
													914.505	0.0547564
													915.587	0.0209069
													916.194	0.0155758
													917.103	0.0676272
													920.219	0.337049
													920.84	0.282918
													920.878	0.339744
													921.75	0.195443
													922.399	0.024494
													922.446	0.124798
													923.477	0.11812
													924.849	0.072455
													925.484	0.103208
													926.362	0.0541904
													926.475	0.0407667
													927.535	0.0415194	y9	K12,16ac
													928.087	0.306214	y9	K12,16ac
													928.437	0.498991
													929.162	0.128168
													929.441	0.0391484
													932.663	0.251631
													932.914	0.0570034
													935.723	0.130284
													936.32	0.124765
													936.358	0.129109
													937.339	0.137973
													937.633	0.216605
													938.442	0.161248
													938.771	0.0845285
													939.685	0.247587
													939.818	0.110085
													940.549	0.137256
													941.376	0.0113328	y9
													941.492	0.16484	y9
													942.244	0.97129
													942.703	0.217766
													943.346	0.0607196
													945.896	0.0892715
													946.359	0.139382
													947.049	0.128001
													948.186	2.02097
													948.642	0.219151
													951.688	0.139058
													952.387	0.16182
													954.319	0.0176041
													954.414	0.264331
													955.439	0.970901	y9	K12,16pr
													955.49	3.17635	y9	K12,16pr
													956.248	0.13129
													956.309	0.741039
													957.866	0.012515
													958.218	0.342454
													959.578	0.0271319
													961.249	0.208741
													961.322	0.200942
													962.211	0.0579046
													965.591	0.0644805
													967.115	0.0159539
													967.153	0.0434616
													972.384	0.121924
													973.862	0.08875
													975.889	0.0129799
													977.672	0.0564008
													979.196	2.18299	b9
													979.273	3.71074	b9
													980.029	0.364031
													980.796	0.228935
													982.667	0.0829635
													983.328	0.10663
													984.321	0.245711
													984.429	0.750355
													985.476	0.121603
													985.546	0.0075822
													986.418	0.107203
													986.592	0.0212355
													987.811	0.106008
													988.18	0.225992
													989.12	0.0839203
													990.284	0.0191452
													993.016	0.028148
													993.545	0.178281	b9
													993.93	0.099249	b9
													995.383	0.0744709
													996.342	0.0433652
													997.361	0.0163383
													998.082	0.117149
													999.32	0.0243897
													999.403	0.106076
													1001.41	0.0610958
													1003.41	0.106621
													1003.67	0.0813132
													1004.17	0.0791694
													1006.5	0.0887623
													1007.64	0.0363401
													1008.51	0.0524543
													1010.5	0.0123166
													1010.55	0.160779
													1011.47	0.110386
													1012.27	0.208916
													1015.5	0.0902353
													1017.02	0.182372
													1018.26	0.0875074
													1018.68	0.167295
													1019.59	0.0249109
													1020.81	0.237245
													1022.11	0.0429877
													1023.9	0.123516
													1024.97	0.0458215
													1025.17	0.187645
													1025.77	0.0640373
													1027.02	0.0612364
													1029.68	0.0936901
													1032.17	0.226172
													1032.25	0.226004
													1033.32	0.0706873
													1033.51	0.0986683
													1034.32	0.0869641
													1034.32	0.164383
													1035.24	0.0923206
													1036.06	0.730827	b10
													1036.2	0.350413	b10
													1037.51	0.128251
													1037.53	0.0385383
													1038.77	0.208579
													1039.29	0.0336592
													1040.3	0.0778031
													1041.74	0.273209
													1044.02	0.0501665
													1044.92	0.0407599
													1045.89	0.0582826
													1046.1	0.335902
													1048.34	0.124444
													1049.14	0.111285
													1049.56	0.103746
													1050.53	0.179317	b10
													1050.81	0.41335	b10
													1051.44	0.122652
													1051.61	0.0630427
													1052.64	0.104893
													1053.69	0.0479359
													1055.67	0.0863135
													1057.72	0.046335
													1061.34	0.085065
													1061.66	0.12756
													1063.52	0.11742
													1064.62	0.171123
													1065.27	0.152904
													1067.09	0.0870838
													1068.59	0.239178
													1069.47	0.0867037
													1070.18	0.0995457
													1070.51	0.0758497
													1071.35	0.0675944
													1072.12	0.0609581
													1073.38	0.0594573
													1074.63	0.164901
													1075.16	0.159975
													1079.61	0.0531136
													1080.74	0.0600251
													1081.48	0.0792071
													1086.8	0.0474613
													1088.06	0.0175152
													1090.24	0.065999
													1090.5	0.0485374
													1092.85	0.0388379
													1093.47	0.355488	b11
													1093.53	0.539459	b11
													1094.71	0.133864
													1100.49	0.0183782
													1103.42	0.0539822
													1103.61	0.0382629
													1106.41	0.062189
													1106.71	0.0633625
													1107.6	0.0819217
													1111.49	0.109622
													1118.64	0.259545
													1118.77	0.0547448
													1122.53	0.0321872
													1125.41	0.176963	y10
													1125.6	0.307496	y10
													1127.25	0.0982989
													1127.51	0.135226
													1128.67	0.0341392
													1131.58	0.219763
													1132.73	0.0503667
													1133.68	0.132008
													1140.5	0.070677
													1146.5	0.145328
													1146.6	0.0402956
													1152.16	0.0806281
													1153.33	0.0100269
													1155.35	0.0813593
													1156.27	0.0198124
													1156.5	0.0645276
													1157.89	0.0689397
													1158.68	0.0447176
													1160.57	0.0849725
													1164.29	0.465062	b12
													1164.3	0.915343	b12
													1165.24	0.207479
													1165.87	0.100254
													1167.45	0.176891
													1168.69	0.0536126
													1175.45	0.182033
													1178.41	0.0279861	b12
													1178.86	0.182442	b12
													1179.62	0.0966876
													1179.76	0.0244898
													1180.74	0.142298
													1181.39	0.0705954
													1181.46	0.21282
													1182.62	0.393022	y11
													1182.63	0.24344	y11
													1183.68	0.21211
													1186.47	0.0143818
													1194.67	0.0184336
													1196.94	0.029114
													1197.66	0.0667247
													1203.2	0.0238054
													1208.57	0.0411844
													1208.75	0.0190526
													1210.47	0.0568979
													1210.65	0.0209446
													1211.52	0.0541288
													1217.35	0.192288
													1221.46	0.0466668
													1221.88	0.0789987
													1225.19	0.0435455
													1229.38	0.0402415
													1233.23	0.0379169
													1233.85	0.0527158
													1236.84	0.0752489
													1239.42	0.188948	y12
													1239.6	0.948481	y12
													1240.08	0.0286866
													1240.89	0.0257451
													1241.17	0.0433999
													1243.51	0.0474195
													1253.47	0.099397
													1254.77	0.166223
													1255.46	0.0144895
													1260.47	0.0611908
													1261.1	0.0218031
													1266.45	0.0935228
													1270.26	0.149169
													1271.49	0.0485767
													1271.57	0.161168
													1272.27	0.0475629
													1272.79	0.116459
													1273.11	0.108952
													1275.3	0.0586527
													1276.29	0.0541187
													1279.51	0.0914844
													1280.82	0.0291445
													1280.82	0.0321737
													1285.35	0.114722
													1289.25	0.0596201
													1290.86	0.176717
													1301.85	0.0398247
													1310.15	0.0422282
													1310.9	0.0267748
													1313.25	0.0180329
													1318.97	0.107188
													1327.02	0.178786
													1327.39	0.581643
													1327.64	0.705307
													1328.45	0.695116
													1328.64	0.550965
													1329.42	0.251377
													1329.68	0.22387
													1330.6	0.211352
													1330.83	0.0479749
													1332.09	0.109868
													1332.85	0.0408831
													1335.04	0.0236913
													1337.69	0.08786
													1339.7	0.0845487
													1344.57	0.0508885
													1348.27	1.3705	b13
													1348.49	1.30779	b13
													1349.58	0.333521
													1349.77	0.0387775
													1350.52	0.0474999
													1350.64	0.0458094
													1353.4	0.0336306
													1359.91	0.0348598
													1364.64	0.0114743
													1366.28	0.0709346
													1367.68	0.0513616
													1373.64	0.0472463
													1384.59	0.0152407
													1386.16	0.0135211
													1409.38	0.0356048
													1435.4	0.0504421
													1448.1	0.0237788
													1464.29	0.0860654
													1483.23	0.0962749
													1494.37	0.109336
													1667.11	0.0241857
													1692.29	0.0573161
													1723.91	0.0489779
													1792.14	0.126761

## Sheet: wtH4 3ac list
SPECTRUM - MS						SPECTRUM - MS						SPECTRUM - MS						SPECTRUM - MS						SPECTRUM - MS								214.135	0.0482658	fragment ion			K5ac	K5pr			Species	Ion	% total intensity			Avg. ratio
Leonen-H4-Chromatin-MSMS.RAW						Leonen-H4-Chromatin-MSMS.RAW						Leonen-H4-Chromatin-MSMS.RAW						Leonen-H4-Chromatin-MSMS.RAW						Leonen-H4-Chromatin-MSMS.RAW								220.072	0.0107466			b2	0.533812	nd			K5ac, K8ac, K12ac	b9	3.032	4.938	3.981	24.1
ITMS + c NSI d Full ms2 754.84@cid35.00 [195.00-2000.00]						ITMS + c NSI d Full ms2 755.16@cid35.00 [195.00-2000.00]						ITMS + c NSI d Full ms2 754.90@cid35.00 [195.00-2000.00]						ITMS + c NSI d Full ms2 756.51@cid35.00 [195.00-2000.00]						ITMS + c NSI d Full ms2 757.31@cid35.00 [195.00-2000.00]								226.509	0.038992			b2	0.384101	nd			K5ac, K8ac, K12pr		0.339	0.096	0.147
Scan #: 3972		SUM				Scan #: 3907		SUM				Scan #: 4045		SUM				Scan #: 4010						Scan #: 3946								226.97	0.0412641			b2	0.278697	nd			K5ac, K8ac, K12ac	b10	0.875	0.862	1.109	10.3
RT: 28.55		57103.8				RT: 28.17		11410				RT: 28.98		16491				RT: 28.77						RT: 28.40								227.136	0.0251669			b3	0.691731	nd			K5ac, K8ac, K12pr		0.112	0.152	0.064
Data points: 355						Data points: 346						Data points: 352						Data points: 491						Data points: 449								228.239	0.0451717			b3	0.334462	nd			K12pr, K16ac	y8	0.271	nd	0.012	0.2
Mass	Intensity	Normalized intensity				Mass	Intensity	Normalized intensity				Mass	Intensity	Normalized intensity				Mass	Intensity					Mass	Intensity							238.274	0.0210708			b3	0.3711	nd			K12ac, K16pr		0.885	1.005	1.263
226.509	22.2659	0.038992				214.135	5.50711	0.0482658				241.256	2.87028	0.0174051				218.206	6.22383					213.851	8.34213							239.238	0.0298831			b4	0.909844	nd			K12pr, K16ac	y9	nd	0.123	0.054	0.019925
227.136	14.3712	0.0251669				220.072	1.22618	0.0107466				242.919	3.63548	0.0220452				226.325	8.75817					215.225	8.74591							241.198	0.00504077			b4	0.495457	nd			K12ac, K16pr		2.587	4.442	6.296
228.239	25.7947	0.0451717				226.97	4.70822	0.0412641				244.248	6.70792	0.0406762				227.187	3.79388					227.033	5.45471							241.256	0.0174051			b4	0.451998	nd
238.274	12.0322	0.0210708				245.342	5.26919	0.0461806				255.902	5.8449	0.0354429				235.157	3.58777					229.3	8.23105							242.919	0.0220452
239.238	17.0644	0.0298831				246.941	4.15071	0.0363779				269.439	3.92977	0.0238298				236.259	7.48372					235.069	7.62556							244.006	0.00556139				K5ac,K8ac	K5,8 ac/pr
241.198	2.87847	0.00504077				250.056	1.85008	0.0162146				274.325	5.92206	0.0359108				250.162	3.00176					244.909	2.90482							244.248	0.0406762			b5	1.48092	nd
244.006	3.17576	0.00556139				255.271	14.2821	0.125172				284.13	63.3421	0.384101				251.395	4.79995					249.076	14.0622							245.342	0.0461806			b5	3.15542	nd
254.144	7.83899	0.0137276				265.778	7.03559	0.0616617				285.165	2.42139	0.0146831				253.249	9.11625					260.271	7.42017							246.941	0.0363779			b5	1.86215	nd
256.208	7.94047	0.0139053				269.985	14.8703	0.130328				296.188	1.87145	0.0113483				254.178	15.5986					262.36	3.62236							250.056	0.0162146			b6	1.92127	0.0638777
262.986	25.9393	0.0454248				272.094	17.9367	0.157202				297.359	12.1998	0.0739783				256.08	31.1824					270.594	6.19655							254.144	0.0137276			b6	3.05532	0.104122
267.739	31.992	0.0560244				284.213	31.7993	0.278697				299.332	7.56752	0.0458887				256.763	9.84805					272.029	10.5859							255.271	0.125172			b6	2.19114	0.0133279
272.008	7.87129	0.0137842				285.233	29.6054	0.25947				299.972	9.25129	0.0560989				267.21	7.10788					279.052	1.69719							255.902	0.0354429			b7	6.59396	nd
280.304	26.7731	0.0468851				285.9	4.80173	0.0420836				302.14	4.26498	0.0258624				269.238	2.78168					280.035	7.71769							256.208	0.0139053			b7	7.86636	nd
284.055	304.827	0.533812				293.958	8.06633	0.0706954				310.091	2.67424	0.0162163				269.954	6.52727					284.165	50.0382							262.986	0.0454248			b7	5.25791	nd
285.155	79.5056	0.13923				297.032	4.00058	0.0350621				314.344	3.17957	0.0192806				271.184	9.37294					285.09	29.1554							265.778	0.0616617			b8	1.56993	0.00549354
294.332	2.80221	0.00490722				299.447	2.31173	0.0202606				324.096	9.12419	0.0553282				272.164	8.36839					286.194	7.07621							267.739	0.0560244			b8	0.914958	0.168267
299.464	22.8486	0.0400123				302.818	14.1601	0.124103				325.131	26.159	0.158625				273.237	15.8206					287.074	3.54757							269.439	0.0238298			b8	0.921449	nd
301.015	26.1398	0.0457759				310.358	7.57139	0.0663576				325.778	2.85433	0.0173084				282.368	2.68894					292.079	2.79876							269.985	0.130328
302.384	37.0896	0.0649513				311.265	2.28151	0.0199958				327.451	6.32003	0.0383241				284.009	69.6866					293.211	6.53976							272.008	0.0137842				K5ac,K8ac,K12ac	K5,8,12 ac/ac/pr
309.835	11.1601	0.0195436				314.5	4.44973	0.0389985				336.462	2.1208	0.0128604				285.133	71.3719					303.253	12.7553							272.094	0.157202			b9	3.03221	0.33886
313.405	13.0533	0.0228589				315.36	7.8604	0.0688906				337.437	5.74572	0.0348415				286.18	44.9359					310.144	23.016							274.325	0.0359108			b9	4.93812	0.147193
316.123	13.0578	0.0228669				319.179	2.22515	0.0195018				341.218	61.1982	0.3711				288.276	12.5729					317.861	8.8328							280.304	0.0468851			b9	4.98108	0.0964141
323.228	11.2564	0.0197121				323.022	4.25142	0.0372605				342.242	17.6775	0.107195				289.213	9.88535					321.217	6.31643							284.055	0.533812	b2		b10	0.862039	0.152045
324.281	11.5175	0.0201695				325.275	6.83811	0.059931				345.115	2.28392	0.0138495				292.224	3.03111					323.276	7.13044							284.13	0.384101	b2		b10	1.10946	0.0641868
325.215	15.0544	0.0263632				327.056	3.73835	0.0327639				357.295	1.90315	0.0115405				296.111	3.41718					324.04	8.26759							284.213	0.278697	b2		b10	0.875196	0.112068
332.349	16.9813	0.0297377				328.295	5.56619	0.0487835				359.232	218.794	1.32675				296.744	5.26327					327.184	12.8418							285.155	0.13923			b11	0.975709	0.0799684
338.361	15.0063	0.0262791				329.17	13.4672	0.11803				365.885	4.46086	0.0270502				298.956	11.8599					328.242	33.8643							285.165	0.0146831			b11	0.75549	0.0698765
339.023	11.4738	0.0200928				336.901	7.29473	0.0639329				367.327	10.5569	0.0640161				302.344	6.57526					335.111	1.96329							285.233	0.25947			b11	0.129059	0.0602727
341.066	395.004	0.691731				341.135	38.162	0.334462				372.505	11.286	0.0684375				304.309	13.676					336.273	8.08699							285.9	0.0420836			b12	0.916832	0.111652
342.25	59.0371	0.103386				342.279	39.8365	0.349137				378.855	7.97716	0.0483728				307.113	3.76629					341.535	41.9119							293.958	0.0706954			b12	1.98428	0.143922
345.236	18.3899	0.0322043				343.338	7.49446	0.0656834				381.354	3.08816	0.0187263				309.957	9.59387					342.334	33.3214							294.332	0.00490722			b12	0.789851	nd
359.198	894.732	1.56685				347.112	6.15546	0.053948				384.039	7.99552	0.048484				313.36	6.20278					343.132	3.19808							296.188	0.0113483
360.128	5.22461	0.00914932				350.903	10.2213	0.089582				387.119	10.002	0.0606514				317.1	3.86547					344.313	2.41828							297.032	0.0350621				K16ac	K16pr
363.063	12.4571	0.0218149				353.916	6.95133	0.0609232				397.349	17.4355	0.105727				319.25	5.54577					345.209	12.6338							297.359	0.0739783	297.4		y2	0.0138495	1.56685
370.259	60.9384	0.106715				359.3	121.576	1.06552				398.082	81.706	0.495457				323.128	1.80954					354.342	2.48858							299.332	0.0458887	299		y2	0.0322043	1.32675
373.072	21.4113	0.0374954				366.268	8.88169	0.0778415				400.132	8.95655	0.0543117				324.053	11.0797					355.391	12.4663							299.447	0.0202606			y2	nd	1.06552
374.956	10.1654	0.0178016				370.246	17.113	0.149982				408.282	13.9681	0.0847012				326.079	2.13023					356.223	10.9629							299.464	0.0400123			y3	0.040926	0.806101
380.211	4.63857	0.00812305				378.271	6.19485	0.0542933				413.094	5.87058	0.0355986				326.943	13.7487					359.262	117.53							299.972	0.0560989			y3	0.0316803	0.641849
388.3	4.94055	0.00865188				384.206	4.60283	0.0403403				415.067	126.723	0.768437				328.193	7.62165					360.171	60.5576							301.015	0.0457759			y3	0.0516569	0.0491949
393.099	18.5952	0.0325638				393.17	7.81507	0.0684933				416.951	8.51875	0.0516569				332.971	4.73363					361.265	38.0149							302.14	0.0258624			y4	0.118829	2.24791
395.114	21.8715	0.0383014				396.43	4.25739	0.0373129				427.272	43.0167	0.260849				341.118	141.503					364.288	8.04082							302.384	0.0649513			y4	0.137619	1.56593
397.08	74.4597	0.130394				397.121	11.749	0.102971				428.042	12.1131	0.0734524				342.097	48.3379					367.244	7.71368							302.818	0.124103			y4	nd	2.08306
398.048	519.555	0.909844				398.166	51.5729	0.451998				430.495	105.847	0.641849				343.066	16.4969					368.117	13.7096							309.835	0.0195436			y5	0.0859092	6.33223
399.207	21.0797	0.0369148				402.167	9.57388	0.0839079				436.388	4.4137	0.0267643				345.252	9.98519					369.022	17.193							310.091	0.0162163			y5	0.871576	11.53
400.09	25.2382	0.044197				405.244	6.89793	0.0604552				440.23	7.25757	0.0440092				346.177	25.2319					371.298	4.62868							310.358	0.0663576			y5	0.434144	6.90692
403.484	3.29036	0.00576207				406.161	5.41692	0.0474753				444.33	3.02456	0.0183407				347.956	14.9502					373.391	13.1585							311.265	0.0199958
413.419	21.331	0.0373548				406.94	11.1335	0.0975772				452.118	7.1891	0.043594				356.126	20.1846					374.369	5.70236							313.405	0.0228589				K12,16 ac/pr	K12ac,K16ac
415.043	281.711	0.493332				410.122	8.53538	0.0748062				452.881	3.97239	0.0240882				359.21	489.129					375.098	12.826							314.344	0.0192806			y6	1.98055	0.101644
416.379	18.0907	0.0316803				411.203	1.75873	0.015414				454.557	10.0687	0.0610558				360.318	212.23					376.213	4.34911							314.5	0.0389985			y6	1.22233	0.0852209
424.425	13.4621	0.0235748				413.003	9.67415	0.0847867				455.274	40.182	0.24366				361.174	33.9868					378.178	6.53358							315.36	0.0688906			y6	1.85559	nd
427.026	8.06318	0.0141202				415.063	42.8845	0.375851				456.122	5.75915	0.0349229				366.292	4.69839					385.171	47.6905							316.123	0.0228669			y7	2.01816	nd
430.289	460.314	0.806101				416.054	4.66965	0.040926				457.075	11.0663	0.0671052				367.648	6.72433					388.257	2.15549							319.179	0.0195018			y7	4.14996	nd
437.959	11.3486	0.0198736				417.219	13.5767	0.11899				469.167	2.78064	0.0168615				368.395	3.48555					390.372	4.17187							323.022	0.0372605			y7	5.53862	nd
439.703	10.6877	0.0187163				424.033	3.91185	0.0342845				471.457	19.6064	0.118891				369.362	14.046					395.071	11.8975							323.228	0.0197121			y8	0.885491	0.0119346
448.334	6.4949	0.0113739				429.951	31.9787	0.280269				472.467	1.24807	0.00756817				376.586	4.34093					397.872	84.5933							324.096	0.0553282			y8	1.00465	0.271409
451.048	16.3982	0.0287164				430.587	5.61313	0.0491949				473.123	19.5961	0.118829				380.452	8.51888					399.185	34.0464							324.281	0.0201695			y8	1.26285	nd
452.365	26.2934	0.046045				436.296	3.78739	0.0331937				479.518	9.89312	0.0599909				384.244	4.4991					400.197	22.7879							325.131	0.158625			y9	4.44243	0.122854
455.212	181.937	0.318607				439.025	2.1054	0.0184523				482.156	13.3745	0.0811016				385.415	9.45336					401.477	1.60415							325.215	0.0263632			y9	2.58665	0.0537298
458.998	6.7412	0.0118052				455.172	9.51404	0.0833835				484.179	3.44511	0.0208908				394.383	2.74292					407.234	16.4163							325.275	0.059931			y9	6.29607	nd
467.243	25.491	0.0446398				466.438	6.46498	0.0566607				487.266	370.703	2.24791				395.228	21.9868					413.371	11.9316							325.778	0.0173084
469.064	19.4675	0.0340914				469.878	13.364	0.117126				488.48	12.2774	0.0744493				396.48	15.3254					415.231	31.667							327.056	0.0327639				K8,12,16 ac/ac/pr	K8ac,K12ac,K16ac
471.156	28.7207	0.0502957				471.338	7.22286	0.063303				492.309	16.5918	0.100611				397.231	58.8729					416.181	52.3222							327.451	0.0383241			y10	0.437059	nd
472.327	8.39105	0.0146944				477.302	3.72799	0.032673				494.058	8.40284	0.0509541				398.084	167.556					416.972	4.72905							328.295	0.0487835			y10	0.358882	nd
473.284	78.5856	0.137619				479.119	4.89698	0.0429184				497.57	3.50009	0.0212242				399.138	160.063					417.813	4.53275							329.17	0.11803			y10	0.119774	nd
475.301	37.1347	0.0650303				484.506	6.84515	0.0599926				500.459	12.7775	0.0774816				400.182	15.6779					423.238	12.024							332.349	0.0297377			y11	0.403988	nd
476.41	27.0037	0.0472888				487.327	178.672	1.56593				501.311	9.53566	0.0578233				406.91	9.56316					424.327	10.7996							336.462	0.0128604			y11	0.612167	nd
481.958	27.5309	0.0482121				488.172	9.59276	0.0840734				503.765	18.3469	0.111254				408.107	9.6981					426.18	9.4255							336.901	0.0639329			y11	0.26641	nd
484.073	27.274	0.0477622				489.219	6.22371	0.0545462				505.311	7.40763	0.0449192				412.483	14.6598					427.535	3.13704							337.437	0.0348415			y12	1.23969	nd
487.35	1189.5	2.08306				492.188	3.94496	0.0345746				507.034	8.90091	0.0539742				413.235	9.4372					429.874	33.5538							338.361	0.0262791			y12	1.16643	nd
498.195	4.91071	0.00859962				493.444	4.48351	0.0392947				511.094	10.7354	0.0650983				415.087	179.111					430.677	72.14							339.023	0.0200928			y12	0.825228	nd
499.313	6.9529	0.0121759				495.366	9.76472	0.0855805				512.238	21.0499	0.127644				416.179	56.7912					431.352	54.6528							341.066	0.691731	b3
506.056	16.0336	0.028078				497.256	8.88687	0.0778869				513.45	5.37054	0.0325664				417.338	20.4503					433.121	20.9219							341.135	0.334462	b3
508.59	32.0948	0.0562044				501.467	37.9541	0.33264				514.291	15.7361	0.0954222				418.081	4.42283					439.338	5.9318							341.218	0.3711	b3
509.236	43.7934	0.076691				502.512	3.75126	0.032877				518.879	7.726	0.0468497				418.735	5.61409					440.233	2.24738							342.242	0.107195
509.935	41.1191	0.0720076				509.332	13.8962	0.12179				526.255	66.5443	0.403518				421.094	4.97437					452.369	7.10961							342.25	0.103386
512.489	60.9388	0.106716				511.304	3.03701	0.0266171				529.248	22.8787	0.138734				425.074	1.82566					453.023	4.51264							342.279	0.349137
513.421	8.59387	0.0150496				517.112	11.7319	0.102821				530.283	143.732	0.871576				428.223	5.8022					455.286	7.70029							343.338	0.0656834
514.282	53.2651	0.0932778				521.164	6.13554	0.0537734				538.2	1.56491	0.00948944				430.231	233.401					456.208	14.976							345.115	0.0138495	y2
518.118	12.8868	0.0225674				522.904	22.5115	0.197297				541.485	9.58662	0.0581323				431.321	99.6017					457.204	4.68009							345.236	0.0322043	y2
519.321	14.5181	0.0254241				525.796	35.4182	0.310414				542.12	4.1432	0.025124				432.293	35.9811					467.889	8.88486							347.112	0.053948
522.433	21.954	0.0384459				526.438	8.6458	0.075774				544.349	1139.02	6.90692				438.662	16.5217					469.531	8.08478							350.903	0.089582
523.581	13.8418	0.0242397				527.888	15.8719	0.139105				545.107	35.4034	0.214683				439.44	2.63879					470.329	36.192							353.916	0.0609232
525.382	8.25727	0.0144601				529.614	9.80222	0.0859092				547.011	24.9435	0.151255				451.061	8.42281					473.258	6.52189							357.295	0.0115405
526.308	157.189	0.275269				533.854	1.52262	0.0133446				549.036	6.61658	0.0401223				453.414	30.7458					474.198	4.43824							359.198	1.56685	y2
527.694	23.4613	0.0410854				538.108	1.51466	0.0132748				550.209	52.814	0.320259				455.106	60.3721					476.166	16.6976							359.232	1.32675	y2
529.474	19.0747	0.0334035				539.299	2.93224	0.0256989				553.062	28.3923	0.172168				455.877	37.8768					482.373	8.26324							359.3	1.06552	y2
530.321	247.913	0.434144				542.196	15.7583	0.13811				556.357	46.8319	0.283984				456.478	8.10895					484.063	10.5763							360.128	0.00914932
534.095	25.9585	0.0454586				543.33	33.5632	0.294157				560.193	27.0167	0.163827				457.148	5.05534					487.245	97.6241							363.063	0.0218149
540.107	12.4037	0.0217214				544.337	722.506	6.33223				566.584	28.0053	0.169822				466.382	4.51238					488.194	111.351							365.885	0.0270502
541.883	18.5882	0.0325516				545.365	106.155	0.93037				568.2	307.088	1.86215				467.097	2.94259					489.171	62.9488							366.268	0.0778415
544.341	6584.07	11.53				546.33	30.5079	0.267379				569.267	9.19718	0.0557708				469.372	16.1654					490.387	13.7868							367.327	0.0640161
545.285	9.23087	0.0161651				547.211	7.05281	0.0618126				570.819	15.2973	0.0927613				470.508	39.1814					493.318	15.2067							370.246	0.149982
546.978	27.4148	0.0480088				548.096	5.24478	0.0459666				576.017	35.2731	0.213892				472.631	7.44915					495.079	9.62147							370.259	0.106715
550.268	230.706	0.404012				550.438	10.6036	0.0929329				576.718	6.19604	0.0375722				473.246	32.6287					497.768	4.13711							372.505	0.0684375
551.181	2.64742	0.00463615				551.162	8.12963	0.0712501				577.801	6.11004	0.0370507				474.295	29.4596					499.916	33.831							373.072	0.0374954
552.361	4.88303	0.00855116				552.122	1.31995	0.0115684				579.561	9.48074	0.0574903				476.248	7.22393					501.143	2.19098							374.956	0.0178016
554.101	17.5487	0.0307313				553.234	7.75725	0.0679866				580.807	15.9838	0.0969245				477.314	5.97472					504.291	8.3208							378.271	0.0542933
555.222	19.4959	0.0341411				556.786	16.7801	0.147065				583.468	41.5512	0.251963				477.989	1.0512					504.939	2.05292							378.855	0.0483728
556.354	191.988	0.336209				557.594	16.5442	0.144997				584.552	59.5084	0.360853				479.237	7.28827					505.653	22.2067							380.211	0.00812305
566.064	6.02058	0.0105432				560.022	6.38233	0.0559364				588.19	15.8805	0.096298				479.922	6.8868					509.114	16.4499							381.354	0.0187263
568.129	1801.86	3.15542				561.437	25.3016	0.22175				589.103	44.3806	0.26912				481.011	16.6569					512.768	13.6753							384.039	0.048484
568.81	22.8671	0.0400448				562.092	8.31396	0.0728657				589.963	23.7864	0.144239				482.208	8.28765					513.423	63.0072							384.206	0.0403403
571.482	3.18662	0.00558041				567.987	168.973	1.48092				592.833	19.3692	0.117453				484.09	4.15831					514.305	2.20164							387.119	0.0606514
575.668	71.5334	0.125269				569.16	31.4988	0.276063				596.288	19.8107	0.12013				487.255	542.686					516.703	25.5387							388.3	0.00865188
576.454	24.0699	0.0421512				570.265	8.17442	0.0716427				602.972	24.8757	0.150844				488.352	221.825					518.327	4.11333							393.099	0.0325638
578.446	56.0806	0.0982083				571.361	1.96477	0.0172197				604.498	48.9434	0.296788				489.257	10.9715					523.19	4.88839							393.17	0.0684933
579.373	27.5243	0.0482005				572.324	22.3545	0.195921				606.413	49.5266	0.300325				490.359	11.9864					524.06	11.6338							395.114	0.0383014
580.418	6.3222	0.0110714				576.479	17.7067	0.155186				607.439	22.2225	0.134755				496.449	3.96125					526.044	19.0579							396.43	0.0373129
582.223	40.6522	0.0711901				578.065	9.4793	0.083079				609.157	7.56378	0.045866				498.271	2.37763					527.147	20.8237							397.08	0.130394
583.305	17.563	0.0307563				579.64	10.5199	0.0921995				610.156	9.4869	0.0575277				500.4	16.5472					529.331	9.01372							397.121	0.102971
584.928	449.13	0.786517				583.004	11.1241	0.0974943				611.908	17.2296	0.104478				501.53	10.2779					530.423	47.0141							397.349	0.105727
585.935	7.14947	0.0125201				584.695	19.7441	0.173042				613.259	364.327	2.20924				503.784	18.4025					531.196	18.0351							398.048	0.909844	b4
586.919	33.8826	0.0593352				586.87	20.1545	0.176639				614.062	17.9199	0.108664				508.794	14.6937					532.253	2.13775							398.082	0.495457	b4
590.774	37.7127	0.0660424				592.445	43.447	0.380781				615.596	35.5678	0.21568				509.432	12.1359					536.16	4.48483							398.166	0.451998	b4
597.432	50.1899	0.0878925				594.281	2.85103	0.0249872				619.832	13.7735	0.0835211				512.286	48.1838					538.395	10.3118							399.207	0.0369148
600.181	13.9744	0.0244719				597.351	11.1637	0.0978416				620.538	13.9055	0.0843217				513.299	13.7499					539.004	11.3834							400.09	0.044197
601.232	5.92738	0.01038				600.622	5.94709	0.0521218				621.379	7.26097	0.0440298				514.293	2.96127					544.227	695.096							400.132	0.0543117
604.184	109.122	0.191094				604.428	24.9267	0.218464				623.244	5.50313	0.0333704				516.298	5.55674					545.304	483.712							402.167	0.0839079
607.223	79.6318	0.139451				605.037	8.65588	0.0758624				625.271	361.341	2.19114				516.957	10.8762					546.312	184.4							403.484	0.00576207
608.295	53.0708	0.0929375				606.291	11.2944	0.0989874				626.497	26.7549	0.162239				520.117	8.42707					547.335	56.9501							405.244	0.0604552
609.234	34.9241	0.061159				607.928	28.5759	0.250447				634.023	29.1056	0.176493				522.567	11.9349					548.248	7.84213							406.161	0.0474753
613.289	1587.94	2.78079				610.464	1.69576	0.0148621				635.4	14.2248	0.0862581				524.33	7.46345					549.359	5.19244							406.94	0.0975772
614.084	95.8681	0.167884				611.405	5.93296	0.051998				636.193	22.0648	0.133799				525.59	8.7486					550.351	14.8739							408.282	0.0847012
614.979	17.6171	0.030851				613.474	256.697	2.24976				637.288	9.97749	0.0605025				526.338	137.972					551.167	20.5217							410.122	0.0748062
616.285	44.8814	0.0785962				614.34	16.5943	0.145437				639.357	10.5341	0.0638777				527.292	77.6975					552.338	58.5797							411.203	0.015414
617.088	15.5644	0.0272563				615.73	15.0343	0.131765				641.976	9.01222	0.0546492				528.607	14.654					553.317	46.3407							413.003	0.0847867
618.364	3.02577	0.00529873				618.313	6.56171	0.0575085				644.125	14.7977	0.0897319				530.456	221.107					554.205	5.57815							413.094	0.0355986
619.483	34.2345	0.0599514				619.03	1.87	0.0163892				644.904	30.8628	0.187149				531.374	41.487					555.692	15.6447							413.419	0.0373548
620.842	4.27196	0.00748104				621.32	13.7665	0.120653				646.367	20.8541	0.126458				531.989	7.96174					557.168	38.801							415.043	0.493332
621.808	30.0961	0.0527043				625.162	219.217	1.92127				647.199	41.311	0.250506				533.409	3.64837					557.882	22.0492							415.063	0.375851
625.216	1744.7	3.05532				626.257	72.9412	0.639275				650.245	33.18	0.2012				534.27	9.43247					560.641	15.878							415.067	0.768437
627.923	12.4963	0.0218835				627.088	4.19733	0.0367865				652	8.70078	0.0527607				535.24	6.84102					561.35	76.9869							416.054	0.040926	y3
635.973	6.57292	0.0115105				627.894	2.31147	0.0202583				653.13	19.2359	0.116645				536.375	7.29394					562.209	26.6032							416.379	0.0316803	y3
637.079	10.1887	0.0178424				635.729	54.8774	0.48096				656.379	6.19429	0.0375616				540.38	13.8287					564.96	26.7967							416.951	0.0516569	y3
637.923	14.4884	0.0253721				636.412	9.70395	0.085048				658.686	11.4862	0.0696511				542.677	8.81522					565.629	20.6794							417.219	0.11899
638.876	13.4297	0.0235181				637.753	22.8872	0.20059				659.346	9.01461	0.0546638				544.289	2696.04					566.349	10.2223							424.033	0.0342845
639.629	7.61076	0.0133279				638.521	31.3234	0.274526				661.257	4.65439	0.0282238				545.307	1562.84					568.028	114.347							424.425	0.0235748
641.146	14.5869	0.0255445				639.493	11.8803	0.104122				662.762	57.85	0.350797				546.282	236.472					569.079	184.587							427.026	0.0141202
642.805	3.17421	0.00555868				640.889	10.5575	0.0925283				664.164	47.1817	0.286105				547.635	17.8766					570.217	61.013							427.272	0.260849
645.15	15.6659	0.0274341				641.854	35.1879	0.308396				669.317	33.0332	0.20031				548.375	16.45					571.078	29.2466							428.042	0.0734524
646.373	42.4304	0.074304				642.679	40.6236	0.356036				670.311	2.50453	0.0151872				550.179	91.37					572.1	24.3971							429.951	0.280269
647.214	38.6212	0.0676334				643.464	14.2606	0.124984				671.395	2.30393	0.0139708				551.451	23.5376					574.207	17.098							430.289	0.806101	y3
651.892	31.7919	0.055674				644.903	54.7688	0.480008				672.996	14.0862	0.0854175				552.431	14.4616					574.941	12.2653							430.495	0.641849	y3
653.363	16.3483	0.0286291				646.265	6.81504	0.0597288				674.229	9.64493	0.0584859				553.084	10.1236					582.259	4.41419							430.587	0.0491949	y3
654.003	21.9919	0.0385122				647.39	25.3224	0.221932				675.289	23.9436	0.145192				554.18	8.88332					583.371	46.4086							436.296	0.0331937
655.225	8.40229	0.0147141				651.537	24.627	0.215837				677.987	17.6969	0.107312				556.804	133.745					585.733	96.1439							436.388	0.0267643
657.76	18.8695	0.0330442				653.199	14.0975	0.123554				679.945	53.7513	0.325943				559.176	13.0847					586.371	2.5374							437.959	0.0198736
661.969	45.3147	0.079355				654.546	10.7101	0.0938664				681.143	106.169	0.6438				561.295	85.9141					587.173	1.57758							439.025	0.0184523
664.086	60.6552	0.106219				657.447	4.60179	0.0403313				682.186	44.952	0.272585				562.263	17.6074					590.345	19.301							439.703	0.0187163
665.278	18.8965	0.0330914				659.224	4.81072	0.0421624				682.827	19.7395	0.119699				563.815	22.0434					592.476	7.81829							440.23	0.0440092
666.037	25.0149	0.0438061				662.493	35.1776	0.308305				684.176	20.8759	0.126589				564.487	7.74614					594.037	18.2468							444.33	0.0183407
669.631	31.2274	0.0546854				663.132	44.0254	0.38585				685.243	9.27225	0.056226				565.4	9.1114					594.868	1.69236							448.334	0.0113739
676.639	10.014	0.0175366				663.894	8.96781	0.0785962				687.353	23.1946	0.14065				566.43	5.81366					596.061	4.15085							451.048	0.0287164
677.453	10.8532	0.0190061				664.563	12.1808	0.106756				688.451	31.9285	0.193611				568.167	609.368					597.355	10.5163							452.118	0.043594
680.119	146.96	0.257356				665.605	30.9433	0.271195				689.543	11.2991	0.0685168				569.318	388.737					599.385	5.66793							452.365	0.046045
681.368	174.124	0.304926				667.917	26.6101	0.233218				692.442	42.3441	0.256771				570.247	84.3012					601.09	58.7153							452.881	0.0240882
682.368	114.124	0.199854				669.056	2.98198	0.0261349				693.308	3.9089	0.0237032				571.379	45.1441					602.222	15.4951							454.557	0.0610558
687.324	13.8835	0.0243128				674.387	13.0158	0.114074				694.408	23.5227	0.14264				573.257	8.35959					603.301	6.17601							455.172	0.0833835
688.341	25.709	0.0450216				675.736	34.779	0.304812				695.038	21.1945	0.128521				579.061	22.8209					605.38	20.0129							455.212	0.318607
689.519	319.659	0.559787				676.523	19.4109	0.170122				695.772	6.09025	0.0369307				580.408	34.3348					606.07	8.82592							455.274	0.24366
690.725	29.9778	0.0524971				677.142	4.90367	0.0429771				696.702	32.5346	0.197287				581.259	5.83873					607.145	8.73472							456.122	0.0349229
692.271	16.9218	0.0296335				679.99	85.5182	0.749503				698.316	372.935	2.26144				582.747	31.841					608.562	106.968							457.075	0.0671052
693.122	13.0278	0.0228143				681.323	333.802	2.92552				699.189	44.1918	0.267975				585.209	278.47					609.523	17.9609							458.998	0.0118052
696.237	23.1965	0.0406218				682.53	14.2477	0.12487				699.947	3.39626	0.0205946				586.064	56.3304					610.298	4.73052							466.438	0.0566607
696.938	10.8558	0.0190106				683.309	16.6158	0.145625				700.581	14.0538	0.0852209				586.847	3.16038					612.158	10.9201							467.243	0.0446398
698.236	1859.9	3.25705				684.201	2.18682	0.0191658				702.362	38.0745	0.23088				589.891	39.7965					614.229	304.118							469.064	0.0340914
699.12	114.731	0.200916				685.755	8.30012	0.0727444				703.225	9.60718	0.058257				591.427	5.00167					615.253	125.267							469.167	0.0168615
700.37	58.0424	0.101644				689.613	44.8848	0.393382				704.076	10.2187	0.0619653				592.959	21.3664					616.017	3.59109							469.878	0.117126
701.844	7.99243	0.0139963				691.563	11.2302	0.0984246				705.024	11.3721	0.0689595				596.393	20.9266					617.869	10.9129							471.156	0.0502957
702.547	4.7912	0.00839034				692.962	20.9623	0.183719				706.099	24.067	0.14594				597.331	24.2102					619.109	20.2814							471.338	0.063303
703.638	35.2313	0.061697				693.942	12.0068	0.105231				708.375	15.536	0.0942086				599.548	11.6356					620.525	28.1771							471.457	0.118891
704.672	184.163	0.322506				696.224	7.58499	0.0664768				709.023	33.8805	0.205448				601.681	8.79739					622.192	18.7847							472.327	0.0146944
705.389	15.5117	0.027164				697.425	6.08299	0.0533129				710.1	145.165	0.880269				604.197	25.4725					623.129	6.93518							472.467	0.00756817
706.422	70.9086	0.124175				698.407	184.776	1.61942				711.161	11.7089	0.0710017				604.931	58.6587					624.143	30.4529							473.123	0.118829	y4
708.326	54.3982	0.095262				699.126	29.7997	0.261172				712.227	12.7769	0.0774781				605.993	18.9309					625.236	108.648							473.284	0.137619	y4
710.05	452.713	0.79279				702.215	1.50517	0.0131917				714.359	326.613	1.98055				607.319	27.3607					626.127	90.454							475.301	0.0650303
710.943	52.2887	0.0915679				705.244	66.2558	0.580683				715.106	4.68392	0.0284029				608.469	36.3343					627.183	85.7649							476.41	0.0472888
711.58	57.4458	0.100599				707.322	13.3852	0.117311				716.105	22.8197	0.138376				610.081	6.14278					628.293	26.1814							477.302	0.032673
712.373	16.5354	0.0289568				708.948	66.2284	0.580443				717.029	23.7403	0.143959				612.171	18.3964					629.281	6.71619							479.119	0.0429184
714.402	1059.61	1.85559				709.767	56.2141	0.492675				718.264	41.8636	0.253857				613.655	650.349					631.042	6.50885							479.518	0.0599909
715.872	24.4784	0.0428665				710.475	34.3582	0.301124				719.171	36.451	0.221036				614.427	165.403					633.307	3.60882							481.958	0.0482121
716.778	32.2795	0.0565278				711.525	36.6633	0.321326				720.276	105.445	0.63941				615.851	35.8661					635.274	14.3324							482.156	0.0811016
717.463	78.5591	0.137573				714.36	139.467	1.22233				721.418	11.6536	0.0706663				617.799	22.9765					638.546	31.9218							484.073	0.0477622
718.377	38.9963	0.0682902				715.505	46.2223	0.405104				722.152	2.45213	0.0148695				618.853	8.4583					641.142	1.02635							484.179	0.0208908
719.09	1.89609	0.00332043				716.405	35.8392	0.314104				723.653	65.0614	0.394526				619.547	10.4799					645.596	52.4841							484.506	0.0599926
720.245	314.486	0.550728				717.494	64.1793	0.562484				724.469	42.2587	0.256253				624.578	32.6973					647.307	11.5825							487.266	2.24791	y4
721.486	16.9783	0.0297324				718.258	28.9941	0.254112				725.991	5.83949	0.0354101				625.228	694.502					649.23	29.0929							487.327	1.56593	y4
722.849	170.923	0.299321				719.444	114.754	1.00573				726.825	22.7185	0.137763				626.154	567.221					652.451	5.84982							487.35	2.08306	y4
725.413	214.94	0.376402				720.446	46.5162	0.40768				728.173	45.7552	0.277455				627.155	113.152					653.434	39.9837							488.172	0.0840734
726.327	24.97	0.0437274				721.681	46.5006	0.407543				729.358	20.5103	0.124372				628.297	7.91693					654.266	21.6935							488.48	0.0744493
728.493	13.9307	0.0243954				723.463	47.0375	0.412249				730.423	31.7454	0.192501				629.382	44.9772					655.599	13.0616							489.219	0.0545462
729.125	48.3336	0.0846417				724.954	48.8963	0.428539				731.759	40.9961	0.248597				633.458	9.84256					656.695	6.21469							492.188	0.0345746
730.6	53.9872	0.0945422				725.825	31.9051	0.279625				732.449	5.08799	0.0308531				638.233	3.07744					657.326	2.04639							492.309	0.100611
731.982	61.8788	0.108362				726.565	19.3137	0.16927				733.965	97.1976	0.589397				639.272	22.7347					659.98	34.637							493.444	0.0392947
733.127	41.4432	0.0725754				727.732	28.1116	0.246377				734.601	3.54962	0.0215246				640.247	13.6655					663.253	15.181							494.058	0.0509541
734.092	32.5803	0.0570546				728.334	18.121	0.158817				735.404	48.0604	0.291433				641.272	20.1214					663.872	24.5352							495.366	0.0855805
736.113	393.812	0.689643				730.803	47.6292	0.417434				736.135	293.778	1.78144				642.255	2.6514					665.465	19.5198							497.256	0.0778869
736.912	669.192	1.17189				732.173	45.0178	0.394548				737.105	441.946	2.67992				642.884	11.2727					666.455	34.1241							497.57	0.0212242
738.162	4491.99	7.86636				733.228	33.2975	0.291828				738.171	867.084	5.25791				644.715	9.74239					667.482	60.1204							498.195	0.00859962
739.5	127.42	0.223138				733.96	52.4956	0.460085				739.112	36.6576	0.222288				647.786	18.8628					668.652	5.43103							499.313	0.0121759
740.185	2.55703	0.00447788				736.206	157.152	1.37732				740.944	22.4956	0.136411				649.623	11.9035					670.038	14.0602							500.459	0.0774816
741.662	1.94301	0.00340259				737.139	304.75	2.67091				742.302	98.8291	0.59929				650.403	7.50976					671.84	38.1358							501.311	0.0578233
742.618	129.377	0.226564				738.134	752.369	6.59396				745.817	544.895	3.30419				651.075	13.1524					672.473	10.3076							501.467	0.33264
743.63	16.4446	0.0287977				739.185	153.293	1.3435				746.639	1.74649	0.0105906				657.747	17.3143					674.587	15.9907							502.512	0.032877
744.286	10.1093	0.0177033				740.937	11.2132	0.0982752				748.046	6.6173	0.0401267				658.353	10.4448					675.58	52.8454							503.765	0.111254
745.822	2094.88	3.66855				742.459	15.4117	0.135072				770.087	13.1797	0.0799203				661.771	49.7806					676.791	9.31551							505.311	0.0449192
746.549	73.6444	0.128966				743.799	48.254	0.422911				771.339	684.37	4.14996				662.645	24.9261					679.105	9.1717							506.056	0.028078
748.36	11.1843	0.0195859				745.292	117.332	1.02832				772.483	15.445	0.093657				663.689	32.1916					681.52	83.138							507.034	0.0539742
749.683	28.4134	0.0497575				746.122	178.135	1.56122				774.592	22.3128	0.135302				664.434	25.4586					682.28	195.802							508.59	0.0562044
767.021	51.6044	0.0903695				746.95	15.195	0.133173				777.434	95.5164	0.579203				665.544	27.6683					683.382	138.446							509.236	0.076691
769.407	7.91913	0.013868				754.096	9.85462	0.0863684				778.053	19.8465	0.120347				666.477	60.6123					684.212	25.7207							509.332	0.12179
771.438	3162.76	5.53862				771.324	230.272	2.01816				781.213	33.0225	0.200246				667.192	28.2785					685.341	16.8211							509.935	0.0720076
772.519	10.794	0.0189025				772.287	107.23	0.939794				784.241	10.4046	0.0630923				668.423	18.7471					688.245	6.09512							511.094	0.0650983
777.646	39.3906	0.0689807				772.936	5.16144	0.0452362				785.695	1.90079	0.0115262				669.381	24.8584					690.439	35.1006							511.304	0.0266171
782.517	35.4067	0.0620041				773.871	10.7985	0.0946409				786.584	23.2965	0.141267				670.26	7.22643					691.388	15.2179							512.238	0.127644
786.312	20.6105	0.036093				777.488	3.72758	0.0326695				787.263	5.66037	0.034324				672.344	10.0541					692.002	1.59057							512.489	0.106716
792.568	3.12003	0.00546379				778.915	1.07624	0.00943243				794.739	74.4558	0.451493				675.672	87.9436					693.53	15.6139							513.421	0.0150496
794.75	202.812	0.355165				779.665	17.5739	0.154022				795.504	151.956	0.921449				681.266	128.915					694.904	20.6931							513.45	0.0325664
795.361	522.476	0.914958				780.779	54.1075	0.474212				801.274	4.13837	0.0250947				682.224	143.505					695.846	66.7142							514.282	0.0932778
796.544	27.6818	0.0484763				786.854	5.73779	0.0502875				806.149	35.6462	0.216155				683.321	52.6671					696.956	5.99366							514.291	0.0954222
803.39	3.1208	0.00546514				788.247	24.9697	0.218841				812.124	60.5761	0.367328				684.316	21.5297					697.62	15.9606							517.112	0.102821
808.655	19.8938	0.034838				790	36.2458	0.317667				813.938	11.4924	0.0696887				685.19	7.30063					699.219	280.074							518.118	0.0225674
809.445	3.13702	0.00549354				791.839	21.1305	0.185193				818.427	3.98026	0.0241359				686.926	5.51627					700.006	221.717							518.879	0.0468497
812.149	602.023	1.05426				795.136	179.128	1.56993				820.663	83.3792	0.505604				687.775	11.9501					702.083	14.8727							519.321	0.0254241
812.92	3.68937	0.00646082				796.271	28.7415	0.251898				823.114	2.25019	0.013645				689.917	128.635					703.945	11.205							521.164	0.0537734
813.576	15.2385	0.0266857				797.497	3.49914	0.0306673				829.39	9.18738	0.0557114				690.657	8.95995					705.177	17.1048							522.433	0.0384459
819.859	6.53476	0.0114437				800.553	10.8586	0.0951677				831.727	2.41546	0.0146471				691.73	49.182					708.431	7.36725							522.904	0.197297
820.64	23.7156	0.0415307				801.426	6.11532	0.0535962				836.977	7.28005	0.0441455				693.23	20.6984					710.444	36.2084							523.581	0.0242397
834.077	8.68209	0.0152041				809.459	19.1992	0.168267				839.219	12.2801	0.0744652				694.476	31.6639					711.296	42.1527							525.382	0.0144601
838.343	6.72945	0.0117846				812.206	24.5409	0.215083				849.356	13.0753	0.0792871				696.243	19.3474					712.314	98.1776							525.796	0.310414
841.118	5.11558	0.00895839				825.353	12.1695	0.106656				852.339	44.8326	0.27186				697.304	26.8162					713.522	39.7332							526.255	0.403518
844.25	7.6134	0.0133326				833.87	23.6976	0.207692				859.476	15.8072	0.0958535				698.98	1224.89					714.521	42.1042							526.308	0.275269
847.115	9.78848	0.0171416				835.458	4.83645	0.0423879				861.113	10.2494	0.0621516				700.061	87.7584					715.349	192.551							526.438	0.075774
851.306	4.969	0.00870171				836.402	48.7266	0.427053				864.876	10.2053	0.0618842				701.008	17.6488					716.477	66.085							527.694	0.0410854
852.22	53.5407	0.0937603				839.348	16.5801	0.145312				866.952	28.7371	0.174259				701.891	18.5358					717.198	13.9004							527.888	0.139105
853.67	12.4967	0.0218842				840.465	19.6503	0.17222				867.575	12.4153	0.075285				702.693	25.3637					718.687	3.00705							529.248	0.138734
855.572	5.64454	0.00988472				843.004	27.4472	0.240554				869.545	45.1374	0.273709				705.506	26.8182					719.538	19.4595							529.474	0.0334035
857.525	10.6968	0.0187323				844.29	29.4927	0.258482				874.722	27.4145	0.166239				706.207	9.6303					720.326	45.7436							529.614	0.0859092	y5
866.29	28.8534	0.0505281				854.42	8.92409	0.078213				876.874	16.4236	0.0995914				709.26	11.8594					721.33	40.9096							530.283	0.871576	y5
867.542	4.69499	0.00822185				857.86	7.45821	0.0653657				877.693	11.2159	0.0680121				710.078	195.23					722.327	188.023							530.321	0.434144	y5
870.086	6.8151	0.0119346				862.476	6.10863	0.0535376				880.54	37.1591	0.225329				710.975	202.305					723.174	31.4292							533.854	0.0133446
871.747	42.4192	0.0742844				867.56	7.61296	0.0667219				881.195	3.20246	0.0194194				711.786	70.4057					724.627	21.1492							534.095	0.0454586
874.375	19.7202	0.034534				868.347	8.34782	0.0731624				884.459	165.676	1.00465				712.785	30.6587					725.384	10.8535							538.108	0.0132748
878.79	74.1356	0.129826				870.416	30.9677	0.271409				885.443	6.36751	0.0386119				714.328	346.178					728.267	16.3559							538.2	0.00948944
884.464	721.133	1.26285				876.442	10.1697	0.0891299				890.803	29.7185	0.18021				715.368	324.712					731.666	13.9089							539.299	0.0256989
885.573	19.7488	0.034584				884.339	101.034	0.885491				895.476	20.335	0.12331				716.339	63.696					732.648	76.3952							540.107	0.0217214
886.976	38.9452	0.0682008				885.08	35.4432	0.310634				898.396	28.4274	0.172381				717.401	13.1763					733.624	12.4412							541.485	0.0581323
887.688	15.4724	0.0270953				885.709	5.29466	0.0464038				899.242	78.6644	0.477013				718.851	12.0661					734.799	5.29745							541.883	0.0325516
888.446	5.19018	0.00908903				887.528	7.58972	0.0665183				901.64	43.4579	0.263525				720.207	83.9128					735.787	17.1751							542.12	0.025124
889.385	14.6401	0.0256377				894.401	12.5242	0.109765				906.419	18.1993	0.110359				721.423	68.4005					736.462	19.4692							542.196	0.13811
892.821	21.7061	0.0380116				895.542	9.96148	0.087305				907.285	51.462	0.312061				722.388	21.4681					737.505	121.041							543.33	0.294157
894.001	6.47285	0.0113352				896.29	5.79357	0.0507763				907.956	10.685	0.0647929				723.458	8.11851					738.29	465.491							544.337	6.33223	y5
894.666	4.91077	0.00859973				900.763	21.1784	0.185613				910.427	7.06098	0.0428171				724.649	53.9898					739.287	761.037							544.341	11.53	y5
901.72	34.4645	0.0603541				905.349	6.32536	0.0554371				912.397	28.5123	0.172896				725.479	86.9902					740.26	631.6							544.349	6.90692	y5
906.583	125.875	0.220432				906.557	3.57291	0.0313139				914.737	15.0181	0.0910685				727.034	66.3169					741.365	149.908							545.107	0.214683
911.302	29.8503	0.0522738				907.182	1.69707	0.0148736				918.29	10.3367	0.0626808				727.942	24.2893					742.604	19.5762							545.285	0.0161651
912.081	5.2357	0.00916875				908.33	3.55417	0.0311497				923.47	62.8815	0.381308				729.025	72.5257					743.455	8.01053							545.365	0.93037
915.258	15.6478	0.0274024				911.531	23.6416	0.207201				927.46	20.2599	0.122854				731.426	28.9351					744.642	60.3823							546.33	0.267379
917.095	30.4322	0.0532929				923.887	40.062	0.351114				929.365	30.785	0.186677				732.564	81.2748					745.625	64.3795							546.978	0.0480088
918.74	24.0679	0.0421477				924.636	4.9253	0.0431666				931.11	18.3535	0.111294				733.466	7.98635					747.035	1046.11							547.011	0.151255
919.533	17.386	0.0304463				933.718	24.4458	0.214249				935.452	12.6725	0.0768448				734.285	64.8611					748.067	65.6151							547.211	0.0618126
923.441	257.743	0.45136				936.583	12.8445	0.112573				936.762	193.448	1.17305				735.035	67.2734					748.979	8.1624							548.096	0.0459666
927.511	30.6817	0.0537298				937.89	49.1077	0.430392				937.446	64.3358	0.390126				736.029	94.0718					765.822	6.67554							549.036	0.0401223
929.617	17.3491	0.0303817				940.495	2.83756	0.0248691				941.434	732.602	4.44243				737.479	375.352					767.291	1.45237							550.209	0.320259
931.267	6.64569	0.0116379				941.472	295.136	2.58665				942.372	38.0622	0.230806				738.22	1602.06					768.796	13.1381							550.268	0.404012
937.15	245.337	0.429634				942.606	66.2225	0.580391				943.008	6.09887	0.036983				739.14	1649.67					771.505	96.7758							550.438	0.0929329
939.26	22.2327	0.0389339				944.775	11.0282	0.096654				943.878	40.7024	0.246815				740.138	329.787					772.52	206.96							551.162	0.0712501
939.868	28.0188	0.0490666				947.468	39.0523	0.342264				945.446	44.9217	0.272401				740.894	19.3566					773.5	322.712							551.181	0.00463615
941.54	3595.29	6.29607				948.41	22.3168	0.195591				947.167	49.5576	0.300513				741.79	17.6796					774.446	71.9529							552.122	0.0115684
943.01	61.3874	0.107502				950.609	3.91757	0.0343346				948.113	15.1523	0.0918821				744.635	38.194					775.569	14.3783							552.361	0.00855116
944.976	41.3777	0.0724606				952.275	10.5311	0.0922976				950.793	24.8221	0.150519				746.463	2542.63					778.729	24.7874							553.062	0.172168
946.833	18.653	0.0326651				960.117	13.0079	0.114005				954.457	6.79462	0.0412019				747.451	87.7208					781.158	25.1827							553.234	0.0679866
947.518	422.685	0.740205				963.258	7.05836	0.0618613				961.562	13.3587	0.0810062				748.53	15.8668					790.409	6.88819							554.101	0.0307313
952.485	12.439	0.0217832				965.141	345.974	3.03221				963.23	2.9601	0.0179498				750.738	9.03554					791.391	11.0294							555.222	0.0341411
956.889	32.8836	0.0575857				966.099	74.7598	0.655215				965.167	814.346	4.93812				751.763	10.4788					794.595	25.1048							556.354	0.336209
958.494	15.9666	0.0279607				972.856	9.93356	0.0870603				966.228	23.2106	0.140747				767.273	16.1015					795.248	46.4836							556.357	0.283984
959.471	11.7158	0.0205166				977.559	3.83714	0.0336297				968.395	6.15096	0.0372988				768.577	8.65399					796.202	55.2134							556.786	0.147065
962.529	4.56382	0.00799216				979.162	38.6638	0.33886				971.136	32.1255	0.194806				771.314	899.232					797.132	87.9869							557.594	0.144997
964.764	648.306	1.13531				981.001	3.17397	0.0278175				976.027	11.1859	0.0678305				772.395	1175.21					798.024	35.9006							560.022	0.0559364
965.377	2844.38	4.98108				983.836	11.7332	0.102833				978.999	27.7117	0.168041				773.478	268.597					800.317	2.5001							560.193	0.163827
966.389	10.0515	0.0176023				984.741	9.79635	0.0858577				979.698	15.8997	0.0964141				774.474	24.9827					807.294	17.8851							561.437	0.22175
967.981	19.7241	0.0345409				987.926	13.0751	0.114593				981.822	24.4266	0.148121				777.267	32.3242					810.354	13.3757							562.092	0.0728657
969.53	18.2641	0.0319841				994.417	17.1901	0.150658				984.265	11.143	0.0675703				778.366	38.0715					811.445	20.636							566.064	0.0105432
974.574	6.47726	0.011343				999.776	13.8761	0.121614				1004.41	62.8914	0.381368				779.199	29.6907					812.233	28.3466							566.584	0.169822
977.457	4.77659	0.00836475				1005.12	19.4245	0.170242				1005.53	16.2081	0.0982842				781.828	16.8922					813.241	44.1039							567.987	1.48092
979.354	84.0525	0.147193				1008.85	11.9442	0.104682				1007.99	11.6288	0.0705161				784.311	28.9654					814.15	100.641							568.129	3.15542	b5
980.54	22.4144	0.039252				1013.93	3.35916	0.0294405				1011.34	21.4422	0.130023				786.448	9.44256					815.236	18.016							568.2	1.86215	b5
985.513	26.873	0.0470599				1022.26	99.8597	0.875196				1012.28	13.9636	0.0846742				791.305	12.8271					821.271	21.6919							568.81	0.0400448	b5
990.574	9.2549	0.0162072				1022.91	16.1878	0.141874				1017.85	11.9569	0.0725058				792.594	14.8478					822.535	18.5142							569.16	0.276063
991.474	24.517	0.0429341				1023.53	38.2964	0.335639				1018.75	11.667	0.0707474				795.217	304.274					827.377	5.84575							569.267	0.0557708
995.913	5.51299	0.00965434				1025.17	7.97942	0.0699337				1022.15	142.159	0.862039				796.242	332.044					828.862	12.2781							570.265	0.0716427
999.383	12.6247	0.0221083				1036.3	12.787	0.112068				1022.81	28.2601	0.171367				797.228	77.243					831.797	19.4441							570.819	0.0927613
1000.48	20.2816	0.0355171				1036.96	7.75502	0.067967				1026.28	5.2034	0.0315529				798.73	13.7989					836.193	3.60475							571.361	0.0172197
1003.85	39.9185	0.0699052				1038.47	22.1744	0.194342				1027.64	15.112	0.0916379				803.136	10.3752					839.785	11.1822							571.482	0.00558041
1004.46	229.552	0.401991				1041.37	7.27	0.0637162				1033.19	9.81713	0.0595301				808.509	33.8826					842.498	3.54299							572.324	0.195921
1007.82	13.8822	0.0243104				1045.49	5.49913	0.0481958				1034.19	9.846	0.0597052				809.298	11.3037					849.138	23.5781							575.668	0.125269
1011.73	7.11866	0.0124662				1051.8	10.4065	0.0912057				1036.19	25.0738	0.152045				810.279	1.20766					852.72	35.9397							576.017	0.213892
1019.43	5.78886	0.0101374				1057.92	19.4297	0.170287				1037.76	22.9845	0.139376				811.78	117.951					859.808	37.1288							576.454	0.0421512
1020.45	46.6687	0.0817261				1061.43	17.9675	0.157472				1038.6	5.81442	0.0352581				812.671	179.729					863.344	3.99329							576.479	0.155186
1022.24	633.546	1.10946				1068.38	13.8007	0.120953				1051.67	8.83741	0.0535892				813.513	111.061					869.47	1.53902							576.718	0.0375722
1022.91	37.3504	0.065408				1069.53	2.78757	0.024431				1060.96	12.3873	0.0751156				814.455	15.7392					870.319	23.5268							577.801	0.0370507
1025.08	25.3308	0.0443593				1079	18.9326	0.165931				1066.36	4.5641	0.0276763				815.617	30.5264					872.428	11.2389							578.065	0.083079
1033.16	8.23401	0.0144194				1079.78	14.7256	0.129059				1069.66	4.3626	0.0264544				816.446	9.70605					877.289	6.83361							578.446	0.0982083
1036.27	36.653	0.0641868				1080.43	10.2794	0.0900915				1074.25	15.8002	0.0958108				817.354	5.95144					878.738	21.0334							579.373	0.0482005
1040.75	23.2891	0.0407838				1092.68	5.71124	0.0500547				1079.36	124.588	0.75549				821.215	6.95067					881.753	14.397							579.561	0.0574903
1045.19	40.0617	0.070156				1093.39	7.97289	0.0698765				1093.33	13.1876	0.0799684				823.281	4.00838					884.552	22.1918							579.64	0.0921995
1047.23	30.6362	0.0536501				1100.3	7.04076	0.0617071				1097.37	14.4801	0.0878057				826.06	12.5203					885.52	81.385							580.418	0.0110714
1051.38	51.1423	0.0895603				1104.3	5.57253	0.0488391				1101.5	16.439	0.0996846				828.752	6.75277					886.563	19.3895							580.807	0.0969245
1056.94	19.4982	0.0341452				1106.86	8.16523	0.0715622				1111.54	59.1833	0.358882				832.912	29.7049					887.501	9.27586							582.223	0.0711901
1058.73	18.025	0.0315654				1109.3	2.00044	0.0175323				1131.71	7.96573	0.0483034				834.188	13.4819					895.392	2.12824							583.004	0.0974943
1059.97	5.28815	0.00926061				1111.7	13.6662	0.119774				1132.36	33.8085	0.205011				842.733	15.3135					896.193	7.8442							583.305	0.0307563
1061.35	7.43575	0.0130215				1112.82	31.3177	0.274477				1143.44	3.39184	0.0205678				846.682	3.63563					897.882	35.7435							583.468	0.251963
1069.51	5.7575	0.0100825				1121.12	10.7431	0.0941556				1146.34	10.5368	0.0638943				851.649	10.4815					901.265	8.98139							584.552	0.360853
1074.41	10.6489	0.0186483				1123.36	16.0391	0.140571				1148.31	3.60516	0.0218613				853.474	21.0673					902.287	16.5596							584.695	0.173042
1076.63	11.4446	0.0200418				1129.02	8.04275	0.0704887				1150.23	151.195	0.916832				854.697	3.78105					903.966	24.1629							584.928	0.786517
1079.24	557.166	0.975709				1132.41	9.5887	0.0840378				1151.51	27.1114	0.164401				859.552	1.92157					907.532	5.94365							585.935	0.0125201
1080.05	8.64754	0.0151436				1134.59	8.71392	0.076371				1163.79	10.7509	0.0651922				866.393	1.98784					909.438	9.16039							586.87	0.176639
1083.27	46.0202	0.0805906				1140.81	6.76419	0.0592831				1164.6	23.7343	0.143922				867.438	29.2219					910.532	14.768							586.919	0.0593352
1089.43	58.0584	0.101672				1141.5	27.9769	0.245197				1165.63	8.31776	0.0504381				868.708	16.5886					917.158	19.9175							588.19	0.096298
1093.55	34.418	0.0602727				1149.41	10.3332	0.0905632				1168.54	66.6217	0.403988				869.441	37.44					918.329	70.5895							589.103	0.26912
1095.64	14.3988	0.0252151				1150.33	90.1218	0.789851				1181.87	19.6345	0.119062				870.488	13.2599					919.053	18.7919							589.963	0.144239
1111.41	249.577	0.437059				1151.25	25.515	0.22362				1182.98	12.0336	0.0729705				871.647	23.3714					919.661	7.23286							590.774	0.0660424
1112.05	14.1291	0.0247429				1161.86	13.9437	0.122207				1185.87	8.17339	0.0495627				874.181	26.6748					922.648	10.7895							592.445	0.380781
1122.33	59.473	0.104149				1168.32	52.9511	0.464077				1186.69	5.47754	0.0332153				879.133	8.53486					924.286	31.6593							592.833	0.117453
1123.53	15.4094	0.026985				1168.92	30.3973	0.26641				1187.51	20.796	0.126105				880.342	13.0435					925.251	23.8623							594.281	0.0249872
1132.38	163.488	0.286299				1185.31	11.4681	0.100509				1190.49	2.44888	0.0148498				881.711	38.7675					925.944	9.20776							596.288	0.12013
1133.53	10.6205	0.0185985				1186.54	5.75211	0.050413				1192.46	7.80184	0.0473096				883.817	20.4364					931.006	13.6899							597.351	0.0978416
1141.16	40.544	0.0710006				1193.43	17.9117	0.156983				1193.39	12.8204	0.0777417				884.511	115.711					933.114	20.1078							597.432	0.0878925
1150.32	1133.1	1.98428				1195.54	11.2153	0.0982941				1197.04	5.45749	0.0330937				885.529	305.886					935.619	6.52618							600.181	0.0244719
1161.56	12.9709	0.0227146				1196.6	22.1252	0.193911				1201.52	20.9022	0.126749				886.565	113.845					936.334	60.1593							600.622	0.0521218
1164.15	63.7574	0.111652				1207.29	26.417	0.231526				1207.1	4.2899	0.0260136				887.585	1.95285					941.514	59.2598							601.232	0.01038
1167.46	119.973	0.210097				1225.55	94.1584	0.825228				1212.13	18.703	0.113413				889.17	5.82382					942.299	447.984							602.972	0.150844
1168.6	349.57	0.612167				1226.53	24.1	0.211219				1222.16	7.47122	0.0453048				891.356	6.34529					943.43	375.145							604.184	0.191094
1169.55	8.36072	0.0146413				1247.98	3.33236	0.0292057				1225.51	204.438	1.23969				894.585	2.85942					944.477	141.254							604.428	0.218464
1174.49	25.2082	0.0441445				1249.27	11.2409	0.0985182				1227.41	4.62674	0.0280561				896.578	4.11416					945.255	19.0758							604.498	0.296788
1185.56	16.5391	0.0289633				1266.97	10.3406	0.0906277				1259.23	5.24355	0.0317964				900.51	4.00202					947.131	9.28744							605.037	0.0758624
1191.34	28.0006	0.0490346				1268.56	1.79622	0.0157426				1262.09	3.96501	0.0240434				905.506	10.7888					948.444	42.1967							606.291	0.0989874
1193.52	12.7675	0.0223585				1274.43	6.14729	0.0538764				1264.54	6.48215	0.0393071				906.798	19.8551					949.516	48.0956							606.413	0.300325
1194.82	29.6922	0.0519969				1291.74	1.69953	0.0148951				1265.31	11.8392	0.0717917				907.491	15.1987					952.172	5.74604							607.223	0.139451
1198.46	12.0567	0.0211136				1306.47	24.4487	0.214275				1266.52	6.34399	0.0384694				909.494	12.2924					958.458	7.54876							607.439	0.134755
1207.64	123.911	0.216993				1316.61	43.8632	0.384428				1283.78	7.93171	0.0480971				912.195	7.45337					960.798	4.86058							607.928	0.250447
1214.21	18.5219	0.0324355				1317.7	14.5996	0.127955				1286.64	3.21125	0.0194727				918.309	64.7863					965.214	100.464							608.295	0.0929375
1221.67	27.7881	0.0486624				1334.33	191.391	1.6774				1290.15	14.7895	0.0896819				919.633	26.0845					966.271	263.826							609.157	0.045866
1225.54	666.073	1.16643				1335.34	78.4538	0.687589				1293.44	8.21964	0.0498431				923.138	48.3648					967.236	504.463							609.234	0.061159
1226.19	3.07852	0.00539109				1419.28	9.49931	0.0832544				1314.27	12.4715	0.0756262				924.933	12.9871					968.208	161.512							610.156	0.0575277
1230.8	22.3211	0.0390886				1445.98	5.38355	0.0471828				1316.68	52.903	0.320799				925.6	9.36369					969.121	32.83							610.464	0.0148621
1274.75	10.3603	0.018143										1334.35	424.852	2.57626				926.553	17.4981					974.422	14.6546							611.405	0.051998
1284.6	5.82759	0.0102053										1335.35	27.0642	0.164115				928.551	17.3387					975.438	60.5537							611.908	0.104478
1292.31	21.7545	0.0380965										1349.36	7.12376	0.0431978				930.819	45.9219					976.544	12.972							613.259	2.20924
1313.16	10.0286	0.017562										1390.62	6.89173	0.0417908				931.478	6.37764					977.692	18.0585							613.289	2.78079
1316.45	332.014	0.581423										1491.47	5.25314	0.0318546				936.376	3.41255					978.474	7.47576							613.474	2.24976
1334.4	2058.83	3.60543										1620.42	5.00129	0.0303274				937.499	3.43864					979.441	15.0649							614.062	0.108664
1335.79	4.5319	0.00793626																939.526	41.4866					980.072	10.2072							614.084	0.167884
1423.2	28.5919	0.0500702																941.441	698.708					981.374	12.4954							614.34	0.145437
1985.75	5.36915	0.00940245																942.551	1436.77					985.285	6.35285							614.979	0.030851
																		943.596	348.423					987.04	4.43404							615.596	0.21568
																		944.432	32.2204					992.159	16.005							615.73	0.131765
																		947.217	49.5339					998.438	9.20518							616.285	0.0785962
																		948.304	127.69					999.429	7.49622							617.088	0.0272563
																		949.356	48.3724					1004.19	11.3342							618.313	0.0575085
																		950.556	7.66723					1005.18	6.33505							618.364	0.00529873
																		953.294	5.06362					1006.76	14.7219							619.03	0.0163892
																		954.926	24.2996					1007.41	13.5397							619.483	0.0599514
																		959.41	4.65786					1012.52	29.0359							619.832	0.0835211
																		962.469	6.91322					1013.12	2.80602							620.538	0.0843217
																		963.298	29.6445					1017.26	51.866							620.842	0.00748104
																		964.652	36.7779					1019.6	22.2387							621.32	0.120653
																		965.268	939.525					1020.64	5.89727							621.379	0.0440298
																		966.229	1699.01					1022.37	49.1051							621.808	0.0527043
																		967.268	426.811					1023.26	90.2192							623.244	0.0333704
																		968.356	70.983					1024.21	118.321							625.162	1.92127	b6
																		976.305	1.90936					1025.34	28.4932							625.216	3.05532	b6
																		977.37	13.6604					1028.42	22.14							625.271	2.19114	b6
																		979.589	150.801					1032.76	70.4397							626.257	0.639275
																		980.531	45.0414					1033.6	26.5613							626.497	0.162239
																		981.42	23.9264					1035.31	12.158							627.088	0.0367865
																		985.073	7.71573					1037	8.9772							627.894	0.0202583
																		988.978	9.28025					1038.37	14.3302							627.923	0.0218835
																		996.539	11.4637					1038.99	23.0903							634.023	0.176493
																		999.068	9.96167					1040.77	13.0638							635.4	0.0862581
																		1001.97	20.1238					1042.21	25.004							635.729	0.48096
																		1004.31	18.8652					1052.22	41.0567							635.973	0.0115105
																		1005.45	32.2933					1053.3	6.80797							636.193	0.133799
																		1006.78	18.2351					1057.42	5.90893							636.412	0.085048
																		1007.55	4.02213					1060.82	37.5113							637.079	0.0178424
																		1011.39	16.9102					1068.66	22.4934							637.288	0.0605025
																		1014.91	5.98403					1075.57	4.30291							637.753	0.20059
																		1019.01	6.81787					1078.11	20.1386							637.923	0.0253721
																		1022.18	136.703					1080.36	37.2612							638.521	0.274526
																		1023.29	282.553					1081.26	33.7282							638.876	0.0235181
																		1024.39	81.9019					1082.37	11.1053							639.357	0.0638777	b6
																		1025.54	5.51408					1087.59	4.15764							639.493	0.104122	b6
																		1027.31	1.64304					1094.92	23.4197							639.629	0.0133279	b6
																		1032.95	53.5247					1104.38	2.26955							640.889	0.0925283
																		1033.56	19.421					1110.71	15.1035							641.146	0.0255445
																		1034.59	13.4024					1111.58	6.32426							641.854	0.308396
																		1036.03	18.6594					1112.58	28.7905							641.976	0.0546492
																		1036.74	14.4556					1113.86	22.769							642.679	0.356036
																		1037.49	16.5228					1115.47	14.0383							642.805	0.00555868
																		1040.02	25.7049					1127.39	5.11915							643.464	0.124984
																		1041.73	16.4468					1132.12	8.55569							644.125	0.0897319
																		1049.37	8.10128					1134.43	24.7591							644.903	0.480008
																		1051.96	41.7271					1146.25	6.68107							644.904	0.187149
																		1053.36	19.4345					1147.33	1.78097							645.15	0.0274341
																		1056.2	2.10344					1150.59	52.6895							646.265	0.0597288
																		1060.61	8.38097					1151.57	46.6348							646.367	0.126458
																		1061.4	18.2977					1152.25	174.452							646.373	0.074304
																		1062.41	25.6043					1153.24	16.4487							647.199	0.250506
																		1063.14	33.04					1155.33	19.0691							647.214	0.0676334
																		1067.34	5.60334					1160.66	9.12047							647.39	0.221932
																		1071.46	6.50246					1164.12	1.85995							650.245	0.2012
																		1075.24	10.0669					1165.7	16.7187							651.537	0.215837
																		1078.94	82.1208					1169.56	45.1026							651.892	0.055674
																		1080.18	229.211					1170.69	12.4788							652	0.0527607
																		1081.14	67.6681					1172.56	3.33553							653.13	0.116645
																		1082.81	10.9191					1181.5	8.59056							653.199	0.123554
																		1093.45	21.2663					1195.57	6.21198							653.363	0.0286291
																		1094.12	10.3642					1198.55	10.6866							654.003	0.0385122
																		1095.56	22.2791					1224.37	6.88972							654.546	0.0938664
																		1097.89	13.8711					1226.61	22.7966							655.225	0.0147141
																		1100.5	12.9937					1227.62	79.6324							656.379	0.0375616
																		1103.56	15.6639					1228.63	25.4709							657.447	0.0403313
																		1104.38	3.33665					1229.8	13.6839							657.76	0.0330442
																		1106.46	8.08801					1234.38	6.69371							658.686	0.0696511
																		1111.77	61.9944					1236.43	6.17141							659.224	0.0421624
																		1112.48	84.1765					1242.29	21.719							659.346	0.0546638
																		1113.71	35.913					1259.69	2.18988							661.257	0.0282238
																		1119.96	1.54384					1261.17	8.3328							661.969	0.079355
																		1123.19	1.92562					1262.63	1.45391							662.493	0.308305
																		1124.48	9.30656					1263.68	9.76723							662.762	0.350797
																		1132.83	40.8076					1264.92	11.8117							663.132	0.38585
																		1133.78	26.7931					1280.61	6.64698							663.894	0.0785962
																		1134.59	17.5419					1294.45	23.0121							664.086	0.106219
																		1139.49	12.78					1304.1	8.38098							664.164	0.286105
																		1146.31	8.23556					1313.38	3.72272							664.563	0.106756
																		1147.44	41.4917					1316.82	5.64289							665.278	0.0330914
																		1149.26	11.6215					1318.34	6.19662							665.605	0.271195
																		1149.99	74.1883					1322.63	9.13223							666.037	0.0438061
																		1151.3	657.237					1333.59	1.8286							667.917	0.233218
																		1152.3	157.462					1334.48	18.7147							669.056	0.0261349
																		1153.3	9.89536					1335.24	91.1657							669.317	0.20031
																		1164.17	28.9558					1336.35	244.229							669.631	0.0546854
																		1166.35	11.6561					1337.43	87.6925							670.311	0.0151872
																		1167.98	37.6927					1338.4	64.115							671.395	0.0139708
																		1168.76	43.1903					1357.72	12.3856							672.996	0.0854175
																		1169.53	101.719					1407.06	9.21731							674.229	0.0584859
																		1170.21	35.6258					1659.84	4.28507							674.387	0.114074
																		1171.24	31.1776					1778.14	8.91976							675.289	0.145192
																		1185.2	7.2453					1897.19	8.69993							675.736	0.304812
																		1193.77	10.6836													676.523	0.170122
																		1207.15	6.69602													676.639	0.0175366
																		1208.56	18.8373													677.142	0.0429771
																		1209.68	29.4949													677.453	0.0190061
																		1212.65	9.43783													677.987	0.107312
																		1222.63	15.5586													679.945	0.325943
																		1225.4	84.3576													679.99	0.749503
																		1226.56	247.566													680.119	0.257356
																		1227.61	144.29													681.143	0.6438
																		1234.57	12.374													681.323	2.92552
																		1235.6	7.20452													681.368	0.304926
																		1247.4	7.04069													682.186	0.272585
																		1261.39	17.0702													682.368	0.199854
																		1264.46	7.35557													682.53	0.12487
																		1269.37	19.9783													682.827	0.119699
																		1270.24	5.03403													683.309	0.145625
																		1275.19	7.40969													684.176	0.126589
																		1279.78	7.13677													684.201	0.0191658
																		1299.27	8.06008													685.243	0.056226
																		1307.25	18.457													685.755	0.0727444
																		1314.21	6.19757													687.324	0.0243128
																		1316.82	14.2087													687.353	0.14065
																		1317.61	121.817													688.341	0.0450216
																		1318.9	18.7454													688.451	0.193611
																		1325.69	6.04194													689.519	0.559787
																		1331.31	5.95071													689.543	0.0685168
																		1332.48	5.78448													689.613	0.393382
																		1334.26	112.86													690.725	0.0524971
																		1335.36	1074.63													691.563	0.0984246
																		1336.47	395.367													692.271	0.0296335
																		1337.49	74.3319													692.442	0.256771
																		1339.64	14.012													692.962	0.183719
																		1365.38	9.5801													693.122	0.0228143
																		1389.56	5.50601													693.308	0.0237032
																		1395.09	2.28806													693.942	0.105231
																		1398.05	4.50412													694.408	0.14264
																		1410.39	3.11107													695.038	0.128521
																		1442.59	3.25356													695.772	0.0369307
																		1484.93	8.93964													696.224	0.0664768
																		1659.38	6.64082													696.237	0.0406218
																		1812.7	10.5695													696.702	0.197287
																		1974.39	4.10945													696.938	0.0190106
																																697.425	0.0533129
																																698.236	3.25705
																																698.316	2.26144
																																698.407	1.61942
																																699.12	0.200916
																																699.126	0.261172
																																699.189	0.267975
																																699.947	0.0205946
																																700.37	0.101644	y6
																																700.581	0.0852209	y6
																																701.844	0.0139963
																																702.215	0.0131917
																																702.362	0.23088
																																702.547	0.00839034
																																703.225	0.058257
																																703.638	0.061697
																																704.076	0.0619653
																																704.672	0.322506
																																705.024	0.0689595
																																705.244	0.580683
																																705.389	0.027164
																																706.099	0.14594
																																706.422	0.124175
																																707.322	0.117311
																																708.326	0.095262
																																708.375	0.0942086
																																708.948	0.580443
																																709.023	0.205448
																																709.767	0.492675
																																710.05	0.79279
																																710.1	0.880269
																																710.475	0.301124
																																710.943	0.0915679
																																711.161	0.0710017
																																711.525	0.321326
																																711.58	0.100599
																																712.227	0.0774781
																																712.373	0.0289568
																																714.359	1.98055	y6
																																714.36	1.22233	y6
																																714.402	1.85559	y6
																																715.106	0.0284029
																																715.505	0.405104
																																715.872	0.0428665
																																716.105	0.138376
																																716.405	0.314104
																																716.778	0.0565278
																																717.029	0.143959
																																717.463	0.137573
																																717.494	0.562484
																																718.258	0.254112
																																718.264	0.253857
																																718.377	0.0682902
																																719.09	0.00332043
																																719.171	0.221036
																																719.444	1.00573
																																720.245	0.550728
																																720.276	0.63941
																																720.446	0.40768
																																721.418	0.0706663
																																721.486	0.0297324
																																721.681	0.407543
																																722.152	0.0148695
																																722.849	0.299321
																																723.463	0.412249
																																723.653	0.394526
																																724.469	0.256253
																																724.954	0.428539
																																725.413	0.376402
																																725.825	0.279625
																																725.991	0.0354101
																																726.327	0.0437274
																																726.565	0.16927
																																726.825	0.137763
																																727.732	0.246377
																																728.173	0.277455
																																728.334	0.158817
																																728.493	0.0243954
																																729.125	0.0846417
																																729.358	0.124372
																																730.423	0.192501
																																730.6	0.0945422
																																730.803	0.417434
																																731.759	0.248597
																																731.982	0.108362
																																732.173	0.394548
																																732.449	0.0308531
																																733.127	0.0725754
																																733.228	0.291828
																																733.96	0.460085
																																733.965	0.589397
																																734.092	0.0570546
																																734.601	0.0215246
																																735.404	0.291433
																																736.113	0.689643
																																736.135	1.78144
																																736.206	1.37732
																																736.912	1.17189
																																737.105	2.67992
																																737.139	2.67091
																																738.134	6.59396	b7
																																738.162	7.86636	b7
																																738.171	5.25791	b7
																																739.112	0.222288
																																739.185	1.3435
																																739.5	0.223138
																																740.185	0.00447788
																																740.937	0.0982752
																																740.944	0.136411
																																741.662	0.00340259
																																742.302	0.59929
																																742.459	0.135072
																																742.618	0.226564
																																743.63	0.0287977
																																743.799	0.422911
																																744.286	0.0177033
																																745.292	1.02832
																																745.817	3.30419
																																745.822	3.66855
																																746.122	1.56122
																																746.549	0.128966
																																746.639	0.0105906
																																746.95	0.133173
																																748.046	0.0401267
																																748.36	0.0195859
																																749.683	0.0497575
																																754.096	0.0863684
																																767.021	0.0903695
																																769.407	0.013868
																																770.087	0.0799203
																																771.324	2.01816	y7
																																771.339	4.14996	y7
																																771.438	5.53862	y7
																																772.287	0.939794
																																772.483	0.093657
																																772.519	0.0189025
																																772.936	0.0452362
																																773.871	0.0946409
																																774.592	0.135302
																																777.434	0.579203
																																777.488	0.0326695
																																777.646	0.0689807
																																778.053	0.120347
																																778.915	0.00943243
																																779.665	0.154022
																																780.779	0.474212
																																781.213	0.200246
																																782.517	0.0620041
																																784.241	0.0630923
																																785.695	0.0115262
																																786.312	0.036093
																																786.584	0.141267
																																786.854	0.0502875
																																787.263	0.034324
																																788.247	0.218841
																																790	0.317667
																																791.839	0.185193
																																792.568	0.00546379
																																794.739	0.451493
																																794.75	0.355165
																																795.136	1.56993	b8
																																795.361	0.914958	b8
																																795.504	0.921449	b8
																																796.271	0.251898
																																796.544	0.0484763
																																797.497	0.0306673
																																800.553	0.0951677
																																801.274	0.0250947
																																801.426	0.0535962
																																803.39	0.00546514
																																806.149	0.216155
																																808.655	0.034838
																																809.445	0.00549354	b8
																																809.459	0.168267	b8
																																812.124	0.367328
																																812.149	1.05426
																																812.206	0.215083
																																812.92	0.00646082
																																813.576	0.0266857
																																813.938	0.0696887
																																818.427	0.0241359
																																819.859	0.0114437
																																820.64	0.0415307
																																820.663	0.505604
																																823.114	0.013645
																																825.353	0.106656
																																829.39	0.0557114
																																831.727	0.0146471
																																833.87	0.207692
																																834.077	0.0152041
																																835.458	0.0423879
																																836.402	0.427053
																																836.977	0.0441455
																																838.343	0.0117846
																																839.219	0.0744652
																																839.348	0.145312
																																840.465	0.17222
																																841.118	0.00895839
																																843.004	0.240554
																																844.25	0.0133326
																																844.29	0.258482
																																847.115	0.0171416
																																849.356	0.0792871
																																851.306	0.00870171
																																852.22	0.0937603
																																852.339	0.27186
																																853.67	0.0218842
																																854.42	0.078213
																																855.572	0.00988472
																																857.525	0.0187323
																																857.86	0.0653657
																																859.476	0.0958535
																																861.113	0.0621516
																																862.476	0.0535376
																																864.876	0.0618842
																																866.29	0.0505281
																																866.952	0.174259
																																867.542	0.00822185
																																867.56	0.0667219
																																867.575	0.075285
																																868.347	0.0731624
																																869.545	0.273709
																																870.086	0.0119346	y8
																																870.416	0.271409	y8
																																871.747	0.0742844
																																874.375	0.034534
																																874.722	0.166239
																																876.442	0.0891299
																																876.874	0.0995914
																																877.693	0.0680121
																																878.79	0.129826
																																880.54	0.225329
																																881.195	0.0194194
																																884.339	0.885491	y8
																																884.459	1.00465	y8
																																884.464	1.26285	y8
																																885.08	0.310634
																																885.443	0.0386119
																																885.573	0.034584
																																885.709	0.0464038
																																886.976	0.0682008
																																887.528	0.0665183
																																887.688	0.0270953
																																888.446	0.00908903
																																889.385	0.0256377
																																890.803	0.18021
																																892.821	0.0380116
																																894.001	0.0113352
																																894.401	0.109765
																																894.666	0.00859973
																																895.476	0.12331
																																895.542	0.087305
																																896.29	0.0507763
																																898.396	0.172381
																																899.242	0.477013
																																900.763	0.185613
																																901.64	0.263525
																																901.72	0.0603541
																																905.349	0.0554371
																																906.419	0.110359
																																906.557	0.0313139
																																906.583	0.220432
																																907.182	0.0148736
																																907.285	0.312061
																																907.956	0.0647929
																																908.33	0.0311497
																																910.427	0.0428171
																																911.302	0.0522738
																																911.531	0.207201
																																912.081	0.00916875
																																912.397	0.172896
																																914.737	0.0910685
																																915.258	0.0274024
																																917.095	0.0532929
																																918.29	0.0626808
																																918.74	0.0421477
																																919.533	0.0304463
																																923.441	0.45136
																																923.47	0.381308
																																923.887	0.351114
																																924.636	0.0431666
																																927.46	0.122854	y9
																																927.511	0.0537298	y9
																																929.365	0.186677
																																929.617	0.0303817
																																931.11	0.111294
																																931.267	0.0116379
																																933.718	0.214249
																																935.452	0.0768448
																																936.583	0.112573
																																936.762	1.17305
																																937.15	0.429634
																																937.446	0.390126
																																937.89	0.430392
																																939.26	0.0389339
																																939.868	0.0490666
																																940.495	0.0248691
																																941.434	4.44243	y9
																																941.472	2.58665	y9
																																941.54	6.29607	y9
																																942.372	0.230806
																																942.606	0.580391
																																943.008	0.036983
																																943.01	0.107502
																																943.878	0.246815
																																944.775	0.096654
																																944.976	0.0724606
																																945.446	0.272401
																																946.833	0.0326651
																																947.167	0.300513
																																947.468	0.342264
																																947.518	0.740205
																																948.113	0.0918821
																																948.41	0.195591
																																950.609	0.0343346
																																950.793	0.150519
																																952.275	0.0922976
																																952.485	0.0217832
																																954.457	0.0412019
																																956.889	0.0575857
																																958.494	0.0279607
																																959.471	0.0205166
																																960.117	0.114005
																																961.562	0.0810062
																																962.529	0.00799216
																																963.23	0.0179498
																																963.258	0.0618613
																																964.764	1.13531
																																965.141	3.03221	b9
																																965.167	4.93812	b9
																																965.377	4.98108	b9
																																966.099	0.655215
																																966.228	0.140747
																																966.389	0.0176023
																																967.981	0.0345409
																																968.395	0.0372988
																																969.53	0.0319841
																																971.136	0.194806
																																972.856	0.0870603
																																974.574	0.011343
																																976.027	0.0678305
																																977.457	0.00836475
																																977.559	0.0336297
																																978.999	0.168041
																																979.162	0.33886	b9
																																979.354	0.147193	b9
																																979.698	0.0964141	b9
																																980.54	0.039252
																																981.001	0.0278175
																																981.822	0.148121
																																983.836	0.102833
																																984.265	0.0675703
																																984.741	0.0858577
																																985.513	0.0470599
																																987.926	0.114593
																																990.574	0.0162072
																																991.474	0.0429341
																																994.417	0.150658
																																995.913	0.00965434
																																999.383	0.0221083
																																999.776	0.121614
																																1000.48	0.0355171
																																1003.85	0.0699052
																																1004.41	0.381368
																																1004.46	0.401991
																																1005.12	0.170242
																																1005.53	0.0982842
																																1007.82	0.0243104
																																1007.99	0.0705161
																																1008.85	0.104682
																																1011.34	0.130023
																																1011.73	0.0124662
																																1012.28	0.0846742
																																1013.93	0.0294405
																																1017.85	0.0725058
																																1018.75	0.0707474
																																1019.43	0.0101374
																																1020.45	0.0817261
																																1022.15		b10
																																1022.24		b10
																																1022.26		b10
																																1022.81	0.171367
																																1022.91	0.065408
																																1022.91	0.141874
																																1023.53	0.335639
																																1025.08	0.0443593
																																1025.17	0.0699337
																																1026.28	0.0315529
																																1027.64	0.0916379
																																1033.16	0.0144194
																																1033.19	0.0595301
																																1034.19	0.0597052
																																1036.19	0.152045	b10
																																1036.27	0.0641868	b10
																																1036.3	0.112068	b10
																																1036.96	0.067967
																																1037.76	0.139376
																																1038.47	0.194342
																																1038.6	0.0352581
																																1040.75	0.0407838
																																1041.37	0.0637162
																																1045.19	0.070156
																																1045.49	0.0481958
																																1047.23	0.0536501
																																1051.38	0.0895603
																																1051.67	0.0535892
																																1051.8	0.0912057
																																1056.94	0.0341452
																																1057.92	0.170287
																																1058.73	0.0315654
																																1059.97	0.00926061
																																1060.96	0.0751156
																																1061.35	0.0130215
																																1061.43	0.157472
																																1066.36	0.0276763
																																1068.38	0.120953
																																1069.51	0.0100825
																																1069.53	0.024431
																																1069.66	0.0264544
																																1074.25	0.0958108
																																1074.41	0.0186483
																																1076.63	0.0200418
																																1079	0.165931
																																1079.24	0.975709	b11
																																1079.36	0.75549	b11
																																1079.78	0.129059	b11
																																1080.05	0.0151436
																																1080.43	0.0900915
																																1083.27	0.0805906
																																1089.43	0.101672
																																1092.68	0.0500547
																																1093.33	0.0799684	b11
																																1093.39	0.0698765	b11
																																1093.55	0.0602727	b11
																																1095.64	0.0252151
																																1097.37	0.0878057
																																1100.3	0.0617071
																																1101.5	0.0996846
																																1104.3	0.0488391
																																1106.86	0.0715622
																																1109.3	0.0175323
																																1111.41	0.437059	y10
																																1111.54	0.358882	y10
																																1111.7	0.119774	y10
																																1112.05	0.0247429
																																1112.82	0.274477
																																1121.12	0.0941556
																																1122.33	0.104149
																																1123.36	0.140571
																																1123.53	0.026985
																																1129.02	0.0704887
																																1131.71	0.0483034
																																1132.36	0.205011
																																1132.38	0.286299
																																1132.41	0.0840378
																																1133.53	0.0185985
																																1134.59	0.076371
																																1140.81	0.0592831
																																1141.16	0.0710006
																																1141.5	0.245197
																																1143.44	0.0205678
																																1146.34	0.0638943
																																1148.31	0.0218613
																																1149.41	0.0905632
																																1150.23	0.916832	b12
																																1150.32	1.98428	b12
																																1150.33	0.789851	b12
																																1151.25	0.22362
																																1151.51	0.164401
																																1161.56	0.0227146
																																1161.86	0.122207
																																1163.79	0.0651922
																																1164.15	0.111652	b12
																																1164.6	0.143922	b12
																																1165.63	0.0504381
																																1167.46	0.210097
																																1168.32	0.464077
																																1168.54	0.403988	y11
																																1168.6	0.612167	y11
																																1168.92	0.26641	y11
																																1169.55	0.0146413
																																1174.49	0.0441445
																																1181.87	0.119062
																																1182.98	0.0729705
																																1185.31	0.100509
																																1185.56	0.0289633
																																1185.87	0.0495627
																																1186.54	0.050413
																																1186.69	0.0332153
																																1187.51	0.126105
																																1190.49	0.0148498
																																1191.34	0.0490346
																																1192.46	0.0473096
																																1193.39	0.0777417
																																1193.43	0.156983
																																1193.52	0.0223585
																																1194.82	0.0519969
																																1195.54	0.0982941
																																1196.6	0.193911
																																1197.04	0.0330937
																																1198.46	0.0211136
																																1201.52	0.126749
																																1207.1	0.0260136
																																1207.29	0.231526
																																1207.64	0.216993
																																1212.13	0.113413
																																1214.21	0.0324355
																																1221.67	0.0486624
																																1222.16	0.0453048
																																1225.51	1.23969	y12
																																1225.54	1.16643	y12
																																1225.55	0.825228	y12
																																1226.19	0.00539109
																																1226.53	0.211219
																																1227.41	0.0280561
																																1230.8	0.0390886
																																1247.98	0.0292057
																																1249.27	0.0985182
																																1259.23	0.0317964
																																1262.09	0.0240434
																																1264.54	0.0393071
																																1265.31	0.0717917
																																1266.52	0.0384694
																																1266.97	0.0906277
																																1268.56	0.0157426
																																1274.43	0.0538764
																																1274.75	0.018143
																																1283.78	0.0480971
																																1284.6	0.0102053
																																1286.64	0.0194727
																																1290.15	0.0896819
																																1291.74	0.0148951
																																1292.31	0.0380965
																																1293.44	0.0498431
																																1306.47	0.214275
																																1313.16	0.017562
																																1314.27	0.0756262
																																1316.45	0.581423
																																1316.61	0.384428
																																1316.68	0.320799
																																1317.7	0.127955
																																1334.33	1.6774	b13
																																1334.35	2.57626	b13
																																1334.4	3.60543	b13
																																1335.34	0.687589
																																1335.35	0.164115
																																1335.79	0.00793626
																																1349.36	0.0431978
																																1390.62	0.0417908
																																1419.28	0.0832544
																																1423.2	0.0500702
																																1445.98	0.0471828
																																1491.47	0.0318546
																																1620.42	0.0303274
																																1985.75	0.00940245

## Sheet: wtH4 4ac list
SPECTRUM - MS						SPECTRUM - MS						SPECTRUM - MS						SPECTRUM - MS						SPECTRUM - MS						SPECTRUM - MS						SPECTRUM - MS
Leonen-H4-Chromatin-MSMS.RAW						Leonen-H4-Chromatin-MSMS.RAW						Leonen-H4-Chromatin-MSMS.RAW						Leonen-H4-Chromatin-MSMS.RAW						Leonen-H4-Chromatin-MSMS.RAW						Leonen-H4-Chromatin-MSMS.RAW						Leonen-H4-Chromatin-MSMS.RAW
ITMS + c NSI d Full ms2 748.14@cid35.00 [195.00-2000.00]						ITMS + c NSI d Full ms2 747.84@cid35.00 [195.00-2000.00]						ITMS + c NSI d Full ms2 748.05@cid35.00 [195.00-2000.00]						ITMS + c NSI d Full ms2 748.38@cid35.00 [195.00-2000.00]						ITMS + c NSI d Full ms2 748.74@cid35.00 [195.00-2000.00]						ITMS + c NSI d Full ms2 749.62@cid35.00 [195.00-2000.00]						ITMS + c NSI d Full ms2 750.71@cid35.00 [195.00-2000.00]
Scan #: 3798						Scan #: 3930						Scan #: 4009						Scan #: 3864						Scan #: 4075						Scan #: 3944						Scan #: 3880
RT: 27.53						RT: 28.30						RT: 28.77						RT: 27.92						RT: 29.16						RT: 28.39						RT: 28.01
Data points: 440						Data points: 312						Data points: 390						Data points: 264						Data points: 431						Data points: 543						Data points: 451
Mass	Intensity					Mass	Intensity					Mass	Intensity					Mass	Intensity					Mass	Intensity					Mass	Intensity					Mass	Intensity
215.058	5.15019					213.068	31.2179					224.279	4.02972					212.279	37.6692					226.219	1.53328					213.114	18.1608					235.068	3.33047
217.045	8.20587					223.184	7.62092					228.029	6.16918					227.49	70.9408					228.144	8.56642					228.233	16.7164					242.195	7.85951
224.809	3.88619					224.408	5.02038					238.087	2.35456					228.155	98.1657					235.171	2.62389					229.238	15.1978					249.96	3.79697
225.994	12.3026					228.172	11.8619					240.948	5.05822					229.186	65.9132					238.079	11.4922					242.066	3.42421					259.058	12.1405
232.063	7.75808					229.217	26.4756					245.142	1.54074					238.735	19.2834					240.765	2.60703					249.265	39.1932					260.187	11.7818
233.842	6.90545					237.212	25.612					253.083	2.10493					242.532	39.4691					252.159	3.49684					254.473	20.9977					265.014	4.57899
241.243	8.26489					242.13	23.0727					255.279	1.20921					251.625	34.3941					260.202	9.51571					255.474	17.6358					267.072	16.7779
242.218	5.19986					245.126	27.1915					257.772	13.4008					252.379	32.2622					261.256	2.61498					258.101	8.01149					268.08	2.06933
245.046	7.69163					250.021	25.5442					266.887	18.4144					253.169	36.1864					263.011	9.6285					259.492	8.00042					270.205	14.1868
245.972	7.2782					253.295	15.17					269.156	1.83921					254.376	173.768					265.747	5.9311					262.199	6.7444					277.462	6.45489
252.243	3.94907					257.126	3.84755					271.16	14.5884					256.923	47.7195					267.033	8.50904					263.177	1.18016					278.87	8.51316
254.197	1.94467					260.26	18.4489					278.743	1.55468					260.26	55.263					280.142	4.77883					264.163	2.57748					280.719	5.47692
260.143	12.2734					262.005	20.2421					279.763	9.63563					266.141	116.539					284.112	63.4488					266.925	25.4047					284.028	54.8087
262.187	12.2323					263.268	3.77192					280.996	16.9645					267.216	125.609					285.265	16.1048					268.049	4.26727					285.178	36.0581
263.106	1.84288					264.979	4.09395					284.112	23.4793					268.388	203.316					286.112	2.9435					269.182	4.49105					286.049	37.6219
270.036	4.52938					266.44	8.43849					284.905	36.1981					271.078	136.218					286.995	10.6606					271.109	2.18508					288.052	5.23953
271.142	9.84839					267.127	34.1685					289.187	5.01931					279.97	40.2281					288.439	2.12639					280.329	28.571					294.117	4.58526
279.084	19.1426					267.998	5.6341					299.19	6.6261					284.101	2515.8					297.121	3.98959					284.12	106.613					295.313	22.7964
283.468	7.64591					269.066	33.4676					300.208	8.63492					285.109	617.922					298.137	10.1154					285.123	88.7337					298.165	12.6424
284.159	85.8488					271.25	18.0433					302.338	2.43141					286.193	110.094					299.271	3.52125					285.983	43.8757					299.232	3.90732
285.187	44.2286					272.025	5.59816					310.134	5.10648					295.075	63.8933					302.122	7.48644					287.054	4.0023					302.295	24.867
286.129	9.31754					279.18	4.24962					310.96	37.5191					296.783	31.0604					303.249	1.87126					293.938	1.88564					303.287	15.9554
287.103	3.17573					281.272	4.67374					315.185	1.41846					299.442	87.9887					308.045	5.10145					295.418	9.83858					304.087	23.5482
293.177	14.4575					282.363	9.01278					316.061	3.19646					302.15	77.3527					309.001	4.25895					297.09	8.91525					311.29	8.98968
296.229	2.44099					283.997	382.652					322.971	9.1405					307.194	237.547					311.299	16.6524					299.066	2.52735					313.22	8.89693
302.072	25.9743					284.96	80.6052					324.297	10.589					310.213	73.8213					315.121	7.42773					302.33	56.332					321.993	2.77819
304.207	4.15917					286.129	9.41511					325.088	6.88688					311.165	431.439					323.139	17.1963					303.292	21.9478					323.017	9.78778
306.245	4.83717					293.251	37.6922					327.19	5.6974					312.944	32.6544					327.237	32.8728					304.156	58.8651					327.412	45.5206
307.316	5.9753					297.096	26.2096					328.027	19.8708					322.997	144.397					330.231	5.67816					305.292	22.5574					328.419	18.1382
310.111	13.0472					298.224	6.65124					328.653	3.22988					324.916	224.856					339.003	9.4784					306.042	3.42622					329.069	13.4788
311.271	11.2506					299.17	17.2743					329.254	5.00925					326.446	143.427					341.257	51.1852					308.35	22.9495					336.974	1.11484
312.145	16.3289					302.265	71.4962					330.141	2.53077					327.248	704.354					342.157	27.2424					310.416	25.9349					341.233	29.9693
314.093	11.9503					305.557	27.4356					332.218	4.04931					328.152	690.113					343.205	5.69331					311.025	31.1763					342.141	63.8208
320.317	4.79288					307.249	11.1505					341.128	81.4535					331.958	49.4588					345.206	230.51					312.256	27.7385					343.131	32.6097
322.164	7.02698					315.325	22.0012					341.949	8.13455					335.095	42.161					346.343	12.7744					314.157	13.5735					344.115	15.3934
323.199	16.3779					316.214	16.8314					345.203	180.415					338.3	46.8027					347.156	16.8041					316.369	16.6162					345.138	109.732
324.212	8.17423					317.428	35.5303					346.372	5.76281					341.153	3142.39					350.373	16.5899					317.413	13.5573					346.095	167.061
327.108	19.1431					321.143	16.3847					350.985	6.85802					342.237	582.535					353.916	4.49383					323.191	160.297					347.149	45.584
328.269	23.668					323.484	17.4316					356.471	6.80821					343.149	65.5543					355.163	3.04451					324.003	9.66702					348.156	33.2263
333.233	6.31407					324.421	5.68714					368.372	9.72749					345.174	6355.88					356.143	4.41814					327.356	98.8522					350.379	12.915
337.985	4.75849					327.169	73.6352					373.306	8.82452					346.246	1086.79					356.871	1.72337					328.295	65.9515					351.945	3.44837
339.405	4.35863					328.249	80.351					376.217	7.75494					355.328	38.259					360.256	20.416					329.282	29.5426					355.229	9.46481
341.188	107.219					331.286	18.7218					377.131	8.78687					356.162	208.265					362.988	8.70532					332.254	9.80456					356.189	8.65946
342.286	39.9338					338.099	2.89993					381.259	1.92868					366.151	88.0812					363.93	3.0591					336.204	8.42865					357.411	5.68159
345.258	281.557					341.108	524.28					394.065	3.30131					367.095	80.0298					370.256	14.0402					337.258	1.79297					361.277	7.82877
346.359	20.9362					342.235	87.0785					395.213	4.16584					368.424	39.2882					374.225	12.7899					340.972	200.024					367.065	2.47932
348.274	2.786					345.247	1341.23					397.122	21.4135					370.072	57.558					380.085	5.97751					342.124	178.512					370.297	7.45228
356.165	10.3211					347.954	10.0572					398.108	63.7784					373.108	42.9052					386.982	17.5723					343.075	35.7427					372.176	24.9659
358.125	12.7364					350.331	6.50243					398.956	10.4393					377.033	48.7796					388.204	2.6123					345.192	604.073					373.209	5.03126
359.152	5.62905					351.047	7.73835					401.148	4.78191					378.114	137.255					391.298	6.78187					346.211	310.36					374.204	13.2965
366.011	1.57475					353.112	7.71762					405.261	5.82279					380.012	106.91					392.067	5.03942					347.277	38.7897					377.256	4.93663
368.355	3.73098					356.305	44.1017					407.288	60.7718					381.193	180.502					393.397	20.6767					348.375	11.5068					384.041	10.4728
371.427	10.2799					358.329	6.08915					410.176	2.10001					382.655	88.597					395.262	14.1448					350.923	5.75114					385.168	5.30309
373.534	22.503					359.098	24.3455					411.268	7.64372					383.348	28.6596					395.969	7.86802					354.259	2.88949					386.281	7.20449
374.211	7.82431					363.05	27.8188					412.443	3.36097					384.152	61.6767					398.08	73.0234					355.731	31.3154					387.095	9.16772
376.957	8.27665					367.097	13.3379					415.095	77.8385					385.299	199.401					401.174	7.99613					357.192	2.69122					390.448	5.73259
379.24	3.81525					376.846	119.341					416.305	182.012					393.111	13.1805					409.638	49.4086					368.002	9.39269					393.242	6.70509
380.018	11.3185					377.957	8.20237					417.215	21.8943					395.26	229.188					411.975	3.37795					370.299	9.42266					396.14	7.60761
387.095	2.06518					380.184	5.98061					421.091	9.56507					397.611	1668.97					412.821	3.66467					371.489	2.19559					397.121	8.39896
391.207	3.4187					381.219	13.296					425.314	4.23848					398.238	3421.44					414.463	26.9375					372.11	10.9073					398.494	58.3719
394.095	10.3603					385.611	9.20955					430.34	20.8712					399.096	317.73					415.152	50.6671					374.136	2.38927					399.224	53.9774
395.386	2.19383					393.167	17.7235					432.229	7.2934					410.101	39.9429					416.239	87.7773					378.47	5.94961					400.255	34.4317
397.05	38.8716					395.466	14.7711					434.253	3.22318					413.559	213.7					417.035	14.0074					380.366	5.30097					400.914	9.75234
398.014	115.021					397.449	307.523					435.113	3.29976					414.613	303.286					419.327	8.34713					381.355	1.90884					403.276	11.2925
398.978	5.63097					398.207	639.855					437.359	11.0548					415.22	1876.44					423.263	9.8194					382.224	4.64097					409.193	6.64299
407.009	5.3953					402.975	10.2704					438.993	5.67631					416.31	3810.21					426.213	4.55919					382.93	3.64264					412.311	29.6458
413.472	21.7747					404.095	32.2047					442.51	23.9528					417.229	109.591					427.796	26.2595					385.388	13.3047					415.099	40.1772
415.024	90.0007					406.092	18.3024					446.198	4.22203					419.324	42.7425					430.101	3.90126					386.228	6.45113					416.118	81.621
416.238	182.646					407.1	10.9106					450.289	13.9176					422.306	30.9159					432.345	10.2253					387.081	21.517					417.203	134.519
417.472	1.90126					410.165	6.65771					451.719	14.5381					424.144	186.187					437.216	4.18659					392.147	25.3473					418.414	65.6016
418.121	5.08154					411.564	29.847					455.183	39.6122					427.389	264.702					438.388	6.8605					394.34	2.74054					419.328	3.67067
423.916	7.72957					412.225	11.099					456.315	5.67333					433.338	12.7249					440.018	10.0157					395.373	2.52601					424.129	10.5122
426.25	3.39257					413.284	30.42					463.051	4.78752					438.23	203.259					441.619	1.92911					396.305	18.301					426.201	20.9657
426.921	8.55618					415.095	564.446					465.179	14.8414					447.574	75.973					446.653	3.89743					397.446	95.4306					427.378	4.44199
427.593	2.34027					416.221	706.732					470.061	4.18935					452.429	36.894					449.132	5.38106					398.161	210.674					429.087	4.92282
429.308	17.7558					417.105	2.7528					473.256	286.322					455.243	1120.16					451.336	18.0916					398.989	48.2113					429.988	4.74485
433.224	4.18034					420.093	6.39949					474.424	1.44674					456.24	288.864					452.961	2.61229					400.008	46.0682					431.286	4.24622
438.385	16.7214					423.133	42.1439					476.999	7.6348					464.891	45.6294					455.241	22.8652					401.387	8.73534					434.422	2.54731
438.999	6.10399					426.095	11.4663					478.26	29.018					469.969	20.6681					456.23	4.87727					402.91	5.96722					436.153	8.48727
439.737	3.27876					427.218	108.364					481.696	23.7104					473.225	7834.3					459.17	3.74329					406.989	6.12641					439.078	10.0037
450.032	44.3342					430.306	13.9008					484.108	6.51976					474.349	1261.23					460.273	2.2742					412.31	44.8511					440.241	3.4719
453.3	3.79955					431.136	22.7824					486.183	6.86273					478.263	23.803					464.119	8.97997					413.38	46.4583					448.259	1.82665
455.246	74.223					437.108	12.8394					487.109	11.1808					479.102	160.475					466.702	12.6517					415.199	164.123					452.094	7.37713
456.445	26.9907					438.215	27.3896					488.27	23.7245					481.127	94.4445					470.373	5.44023					416.169	381.307					455.177	10.8604
463.2	11.5914					447.107	15.5415					490.767	20.2703					486.301	37.3116					472.253	3.64202					417.351	171.881					456.212	21.2069
471.861	12.9392					451.052	10.9085					491.717	11.1742					492.448	41.2592					473.29	162.159					418.361	1.3803					457.239	5.45445
473.256	426.237					452.134	10.0203					494.22	6.89568					494.388	38.3488					474.348	48.1265					420.354	5.83042					458.158	4.94824
474.341	57.8759					452.962	14.9354					495.436	4.97896					499.367	33.6497					475.249	2.40722					423.138	5.10219					463.306	9.16104
477.405	4.06257					455.108	382.499					496.772	10.8701					500.29	28.8212					479.048	2.59933					426.28	28.2675					465.54	6.10742
478.266	5.16405					456.243	66.229					508.003	20.9003					506.435	31.9505					480.389	25.1806					427.088	25.4919					473.216	123.592
480.04	2.60454					458.294	18.0663					509.559	5.42162					510.407	54.4495					482.453	8.99582					428.099	11.9306					474.303	198.579
482.257	2.57432					463.164	19.1415					510.372	4.91967					512.204	2120.53					488.187	6.28881					430.76	14.465					475.354	114.8
484.093	16.5848					469.099	6.01305					511.649	15.3986					513.302	916.247					489.302	5.02122					434.145	20.205					476.285	45.6022
485.39	5.89322					469.874	18.2585					512.339	56.3704					514.458	64.551					492.195	31.47					438.242	3.90144					477.196	7.57765
488.478	21.4138					473.211	1683.92					513.441	39.5145					520.325	26.9378					493.275	26.3853					439.141	9.82248					478.096	9.42192
489.556	29.5634					474.139	11.9825					516.516	5.2554					521.475	46.3043					494.174	7.0129					440.028	11.9779					478.835	1.69802
500.164	10.1176					478.217	14.2959					520.292	4.13505					523.863	22.3498					495.376	6.343					442.297	8.04511					481.356	6.7724
501.065	17.0328					480.865	21.5958					522.487	6.97085					526.445	160.68					496.529	4.3433					448.25	6.95714					486.403	8.11657
505.846	10.6252					482.159	5.49953					523.353	3.12951					530.286	42670					498.24	2.38709					450.616	10.38					488.134	16.6607
507.354	2.94294					484.265	7.45279					524.031	19.3943					531.274	5457.59					499.347	2.11387					454.142	9.82832					495.127	13.9463
508.876	13.3522					485.356	9.9873					526.21	12.1495					536.437	78.6731					500.798	14.4927					455.206	52.7223					498.825	4.9628
512.369	126.442					487.267	46.5671					530.252	1368.74					537.23	91.5649					501.946	3.15213					456.18	55.4662					500.135	18.7428
513.334	36.76					488.272	5.94607					531.251	122.92					540.877	212.665					504.411	23.0045					456.84	3.90939					504.278	5.26319
518.223	3.07154					489.462	15.9841					536.174	1.73331					548.408	67.1287					506.388	4.45249					457.447	6.21519					510.511	4.47567
519.125	4.58971					490.486	6.65381					540.041	6.71245					549.433	924.246					507.635	7.72146					459.458	2.66533					512.175	54.9741
519.824	11.3119					495.616	19.8488					544.182	23.7507					550.256	1459.32					509.355	2.07186					461.37	30.2754					513.403	59.9416
521.02	13.7252					496.283	6.71469					545.37	4.04381					551.352	391.925					510.689	6.24343					462.128	7.13375					514.142	23.5738
523.493	14.9153					508.293	4.15578					546.505	13.3414					552.344	25.9981					511.373	5.545					463.574	47.1081					515.273	22.3331
526.191	25.2391					510.115	5.89957					549.488	28.7268					553.188	29.2053					512.383	9.73866					466.458	1.22867					516.205	8.92947
530.258	2135.6					512.234	413.064					550.189	41.1192					562.451	153.654					513.244	15.8838					470.32	32.6838					522.26	14.2396
531.118	249.598					513.445	136.749					551.453	11.3583					565.457	171.717					514.335	12.456					471.58	38.3055					525.316	22.915
531.738	19.6629					523.357	3.82375					552.227	26.0027					566.299	30.1276					516.22	3.17264					472.477	31.0406					526.498	1.99458
533.865	3.86818					524.552	13.7808					552.892	22.701					568.134	14229.7					517.26	6.56443					473.272	682.173					527.108	12.6983
534.493	4.55072					526.424	47.7729					555.049	14.6218					569.221	2192.35					519.298	4.51603					474.316	395.516					527.769	12.5338
538.257	18.4026					528.413	24.4811					560.947	19.64					571.101	28.6979					523.427	7.73311					475.381	78.6457					530.191	521.336
542.351	5.27716					530.268	9151.76					562.027	3.41964					572.357	63.6499					530.295	1107.42					476.505	5.10509					531.322	1056.29
543.331	1.77451					531.3	21.9131					565.327	15.6672					577.778	1846.85					531.258	221.555					478.311	38.6542					532.227	444.321
544.393	6.61365					534.305	18.2894					568.087	479.556					578.422	991.384					532.77	28.229					479.313	26.2296					533.358	186.347
545.219	20.9843					535.224	24.0076					569.186	125.864					581.171	38.1493					535.798	7.81161					485.256	4.7612					534.438	75.1677
547.328	9.49825					538.456	20.9462					570.397	2.00527					582.921	434.521					539.227	24.2794					486.98	9.84528					535.155	3.46331
549.235	86.9173					540.531	59.3223					571.904	12.6577					584.089	113.892					545.206	5.41572					488.311	94.5779					540.143	3.09949
550.247	34.3393					544.173	30.8046					576.089	23.2226					587.277	98.0114					546.382	5.01709					489.292	33.7642					541.901	11.6463
551.324	12.6983					545.013	21.2697					577.451	8.06771					597.443	1548.05					548.116	5.36755					491.49	6.81461					550.119	11.0483
554.276	8.52432					548.298	15.8876					578.077	85.4832					598.353	141.747					550.22	70.0696					494.328	14.0302					550.719	6.13862
555.116	6.01481					549.343	155.492					581.016	6.32982					601.355	87.2726					551.624	11.5028					495.309	8.29286					551.857	14.167
556.339	12.2736					550.413	302.548					582.326	27.0735					606.323	9173.03					554.347	12.4631					496.845	4.62596					553.374	13.7282
557.455	2.7689					553.479	16.3065					583.095	8.38162					607.086	2898.03					555.283	47.8941					497.459	5.7816					555.235	8.45699
558.499	14.1425					555.1	14.2875					585.21	5.7378					608.355	107.849					556.135	48.4723					498.534	3.21951					557.481	14.8033
560.848	3.50257					558.91	46.841					586.251	24.5269					609.386	138.178					557.473	10.7699					502.394	5.41273					561.23	29.4074
563.845	26.6724					564.055	25.6525					589.015	30.8656					613.086	66.084					558.521	28.3028					504.23	27.0342					561.97	1.42689
565.446	5.29506					565.402	48.7138					590.167	17.2839					615.786	53.8297					560.471	20.7324					505.006	8.08408					563.68	2.97334
566.552	17.3073					568.108	2912.66					594.197	19.0381					618.335	112.202					561.12	28.1484					508.37	10.6535					566.492	2.76062
568.112	726.74					569.134	24.1952					595.048	24.8806					619.389	42.0647					563.265	8.04457					509.185	8.52787					568.133	190.204
569.178	53.5847					570.392	39.5836					597.575	108.629					622.468	105.578					565.97	25.662					510.338	7.20308					569.06	224.785
570.407	2.64765					572.515	13.6323					599.339	15.6317					625.167	27574.3					568.218	315.737					512.403	75.1057					570.086	202.076
573.31	16.131					576.293	28.5907					601.248	31.3076					626.181	4747.86					569.175	83.4819					513.426	142.204					571.22	72.1079
575.129	43.656					577.862	723.093					602.029	4.29506					631.416	51.986					570.27	2.15716					514.37	46.5223					573.354	2.37392
577.755	93.6119					583.13	50.9266					604.101	16.7209					642.274	27.4097					572.405	25.8919					515.937	18.5381					577.773	22.5725
578.44	21.4549					585.075	46.358					606.288	477.146					644.36	58.0513					573.648	17.17					517.384	10.1983					578.764	85.714
579.192	6.07313					589.741	11.9489					607.414	50.7333					645.269	26.1201					575.323	14.9389					522.09	19.7106					579.706	97.5265
582.181	31.7772					596.169	12.6585					608.255	2.29479					649.185	24.2552					577.731	64.0394					523.429	7.20251					581.586	2.26873
584.854	3.06445					597.355	562.445					609.059	3.97306					661.512	80.5975					578.378	3.29882					525.985	39.2133					584.251	15.3631
586.639	10.1006					599.297	15.6132					612.341	25.9044					664.471	326.764					579.979	4.84213					527.478	4.4848					585.608	4.83749
591.057	2.26972					602.209	21.3728					615.77	13.8645					665.265	162.393					582.211	14.7453					530.249	3649.34					587.12	1.66716
592.461	10.4941					606.306	2177.36					616.392	5.48695					668.397	93.9563					583.366	24.4773					531.266	2400.92					587.725	20.3674
593.791	12.5583					607.33	239.341					617.697	13.5395					673.526	58.8049					584.005	2.50594					532.343	367.139					589.886	38.3885
594.903	5.11102					608.32	28.5571					619.922	45.1763					677.413	35.5774					588.122	9.44768					533.475	22.1633					591.582	21.2641
595.862	35.1123					611.183	11.9171					621.95	9.80913					678.251	57.3751					592.197	9.79641					536.092	40.1446					592.213	20.0033
597.234	60.4606					613.359	12.8474					623.194	23.0134					680.403	120.197					593.026	5.25071					538.299	43.1435					597.964	24.06
599.038	8.34519					615.1	14.1064					625.179	939.144					682.38	1892.49					596.606	28.0827					539.914	17.592					599.14	38.5666
600.32	3.58183					616.287	55.1675					626.226	102.297					683.526	264.31					597.71	54.2476					541.047	15.239					599.863	1.85026
601.123	11.2082					625.16	5322.81					627.176	12.6378					691.572	15440.2					598.553	26.0707					542.059	5.76458					602.24	27.9319
602.264	4.13269					625.831	25.8357					628.933	4.79697					692.517	572.01					599.353	15.0317					544.977	6.05496					604.195	6.33601
603.099	23.4936					628.864	47.3232					630.123	22.8236					693.524	127.565					600.041	35.6188					548.332	9.34464					605.364	6.55272
605.897	124.913					630.318	9.63395					631.849	10.1104					697.265	94.4192					601.188	39.6373					549.616	99.4167					606.698	68.6399
606.752	485.581					632.431	62.2839					637.323	13.5819					698.569	27.7415					602.526	21.3403					550.461	136.738					607.321	174.222
608.796	2.43492					636.625	11.1874					639.595	16.4503					700.37	6862.36					603.257	4.11165					551.295	45.2673					607.983	344.749
610.675	3.1748					637.823	50.4742					642.565	25.2528					701.483	1740.14					604.182	22.311					552.17	22.3339					609.123	24.9116
612.317	12.0682					644	8.93665					644.569	66.9444					702.329	457.259					606.201	178.029					553.517	6.03155					610.134	11.939
613.276	9.69049					645.032	21.0293					645.256	6.10477					704.514	20.4254					606.873	38.7901					554.283	7.47013					613.17	6.55327
615.88	4.91364					651.79	14.1036					645.867	59.5189					705.678	88.5226					608.043	22.2501					555.113	19.1994					613.892	26.8859
617.432	4.62507					654.225	52.0663					647.631	6.97665					710.105	10143.7					608.743	11.2296					556.107	15.2413					614.721	12.9979
618.86	23.6874					656.498	105.397					649.476	10.6356					711.2	2586.73					609.835	4.01805					562.455	9.04068					620.459	2.57436
619.476	45.13					657.452	18.5152					652.309	7.42328					712.277	86.2685					611.891	19.2297					564.665	2.34119					625.212	240.531
620.196	7.07203					662.407	7.57275					653.52	86.6559					714.772	87.7449					612.757	11.658					565.419	6.23352					626.156	563.893
621.048	16.4838					663.254	91.8113					654.236	21.5322					715.455	134.138					614.021	1.21115					566.2	21.6454					627.153	290.543
622.03	34.8852					664.484	100.889					655.96	28.6252					717.774	81.133					619.419	6.90766					568.089	1091.17					628.196	204.89
623.554	33.1974					666.305	4.94102					657.117	14.5491					720.224	1884.42					620.33	9.40344					569.156	717.025					629.575	20.86
625.181	1200.06					667.568	42.6011					658.506	42.585					721.267	1162.81					621.233	13.7876					570.238	167.537					630.44	30.516
626.276	166.292					670.52	7.44106					659.303	2.61201					722.378	1015.36					622.65	4.89008					571.181	16.1436					634.039	10.3294
627.128	5.49447					672.576	15.9948					660.677	31.2866					723.433	384.466					625.189	465.153					573.185	5.59297					636.252	2.9434
628.63	23.5195					673.726	105.885					661.633	35.0434					724.951	265.587					626.156	165.479					574.347	24.3569					637.946	5.77307
629.257	34.3321					674.405	37.6043					662.612	18.7504					730.016	4819.83					627.135	24.0932					575.261	3.73142					640.249	2.17013
630.768	18.7174					675.041	25.7566					664.382	25.8471					730.884	94.3885					628.46	30.6136					578.255	435.247					642.26	8.40873
631.611	10.7765					676.389	22.0426					667.104	15.7833					732.281	84.4291					629.074	40.709					579.46	15.8596					643.335	4.69177
632.244	5.63532					677.284	18.635					668.937	8.18074					735.126	22.2038					630.45	19.2514					580.211	39.4165					644.14	16.2877
634.535	26.8605					679.692	39.0629					671.252	11.0696					736.981	17.7659					631.297	23.0183					582.313	12.1833					647.068	32.5797
636.336	7.8122					682.297	347.88					672.619	63.3713					739.041	21606.7					632.429	11.7353					583.239	15.3466					647.757	3.44015
636.938	20.3323					683.161	15.9129					673.277	87.9336					740.373	1342.66					633.416	15.1574					584.522	36.3053					649.45	7.40669
637.69	23.1789					684.301	75.8771					674.252	70.2804					741.361	221.53					634.237	13.3137					585.275	9.55175					653.282	12.0695
638.321	10.7232					687.292	43.481					675.1	7.10074					753.421	173.382					635.928	14.9742					587.321	8.91037					655.882	15.8859
639.264	28.8606					689.017	27.9386					676.266	53.7084					757.496	795.748					638.476	27.121					588.094	15.4122					657.143	2.25289
640.499	15.1715					691.321	2576.36					677.519	44.059					758.31	499.417					639.118	22.5528					592.469	22.3506					658.085	33.6011
641.867	27.9147					692.397	132.368					678.664	14.5352					767.353	196.796					640.287	23.9013					595.854	15.4143					658.896	3.74213
644.344	14.8188					693.121	36.5856					680.27	10.9839					772.995	157.9					641.991	27.1267					596.616	12.8538					662.722	19.5765
646.028	23.4214					695.596	18.5566					681.697	35.2789					777.175	290.126					645.08	16.5796					597.908	154.139					665.237	18.1805
648.776	6.17485					698.311	12.86					682.419	84.8874					777.932	40.9452					645.718	7.3715					598.585	16.9346					666.053	13.0345
649.858	9.55533					699.208	123.504					683.194	45.9972					778.66	122.486					647.255	9.895					600.19	9.34836					669.596	5.31169
652.426	24.7385					700.361	1462.74					684.556	18.6051					783.036	104.038					648.387	12.382					601.071	29.793					670.213	9.61478
653.243	8.17682					701.019	31.1997					685.255	52.8942					794.578	396.709					650.327	9.43273					602.095	11.9288					672.472	33.3814
654.015	24.447					702.38	74.6491					686.115	53.1258					795.18	4710.58					651.302	19.6386					603.086	14.0694					673.112	9.97215
655.54	50.8358					703.741	41.5482					687.317	6.15225					796.199	995.242					652.306	4.44902					604.368	29.6916					673.727	3.19056
656.432	21.747					705.299	15.0108					688.15	5.94026					812.218	3589.68					655.595	47.2156					606.745	1308.17					676.486	33.7425
657.094	25.0261					706.689	42.3252					689.096	3.18063					813.29	1179.83					656.383	18.2707					607.402	351.781					677.209	14.4615
659.928	8.77562					707.84	41.5614					691.251	395.414					824.679	171.22					657.08	5.12704					608.345	112.481					678.182	4.99839
661.199	86.9964					709.507	136.52					692.165	103.452					834.662	175.101					659.185	3.44491					609.114	14.0571					682.792	21.8978
662.245	31.5574					710.12	1790.97					693.402	3.12708					847.916	58.708					660.656	19.0422					609.72	10.4045					683.902	21.9455
665.199	4.04176					710.883	59.8532					695.497	39.5662					852.492	731.048					661.482	1.42246					612.216	8.56731					685.577	33.3625
666.334	24.0135					712.704	13.8837					696.378	40.6057					853.282	149.933					662.106	14.8073					613.657	6.03839					686.215	18.038
667.461	5.07463					713.522	53.2856					697.715	21.8173					867.23	92.7894					663.949	25.8145					615.465	32.2832					687.932	12.2579
668.552	27.9557					715.042	10.0556					698.53	20.772					870.463	4785.24					665.351	5.838					616.186	5.53268					689.206	6.43827
670.596	10.9714					715.694	42.1362					699.164	14.862					871.488	1350.7					667.005	6.32113					617.081	10.8767					691.576	51.754
672.789	44.3428					716.815	34.4767					700.424	291.662					879.588	93.1059					672.433	30.8385					619.216	17.4995					692.686	380.928
673.869	69.9968					718.021	74.2297					701.496	73.5712					891.209	35.7299					673.335	7.63666					620.267	33.3547					693.45	228.437
674.833	47.5381					718.773	21.3457					702.449	47.8747					892.562	508.225					674.059	157.096					622.205	37.6243					694.279	1.35329
677.784	11.3937					720.308	432.783					703.205	55.6087					906.386	256.909					675.192	66.0759					625.147	1881.21					695.479	21.6573
680.816	24.9893					721.451	59.3507					704.235	37.0678					907.424	68.3212					676.233	31.1015					626.168	1558.8					696.506	23.3923
682.168	79.8433					722.423	357.268					707.474	27.7417					909.332	1020.91					677.034	2.34807					627.218	211.323					697.332	17.2214
682.839	27.7567					723.978	13.8158					709.378	23.1468					910.631	253.16					680.125	7.61227					628.152	44.7176					698.282	17.2588
684.039	2.85706					724.859	129.556					710.146	226.655					919.525	48.7394					681.876	10.0542					629.236	13.9796					699.409	33.5967
686.992	43.9531					726.726	124.967					710.987	84.2583					923.081	79.1531					682.701	23.8709					631.326	6.84189					700.469	80.1234
688.076	18.3199					727.783	22.1659					712.026	24.8487					924.315	70.7201					683.672	37.2432					632.573	14.7897					701.464	153.539
689.831	37.6132					728.885	85.5017					713.12	39.6154					927.479	22295.8					684.29	29.4109					633.735	11.5449					702.418	215.884
691.619	882.238					730.011	1002.26					714.595	5.94965					928.562	5774.08					685.974	104.156					634.355	23.5269					703.493	82.8868
692.747	35.9063					731.025	21.0534					715.466	44.4745					947.457	1952.66					687.921	13.2554					635.958	3.75198					704.165	22.3238
693.649	24.3902					732.001	100.555					716.27	30.9538					948.523	462.198					689.346	45.5396					637.551	42.4237					705.065	8.39586
694.699	10.6254					736.328	8.4812					716.991	147.96					963.707	90.2378					690.714	32.2783					640.028	6.60851					706.612	76.0892
696.515	6.42764					738.799	2922.97					718.366	23.666					965.231	24363.4					691.527	341.628					641.415	10.8182					707.3	9.14997
697.347	21.1334					739.508	247.3					719.054	19.7094					966.329	6561.46					692.575	27.5984					643.097	1.92026					708.247	33.0075
698.189	10.7622					740.508	102.447					720.211	95.0858					977.524	54.3717					694.205	7.63872					644.039	46.0309					708.904	10.4585
700.325	391.627					754.761	23.8049					721.217	53.8019					980.201	137.328					694.944	4.07958					645.313	1.68682					709.816	26.743
701.668	101.884					756.778	123.242					722.369	69.2069					991.369	33.1481					696.753	18.4413					646.491	4.44131					711.036	263.761
703.07	25.0397					757.665	238.107					723.723	16.3467					1004.38	1118.77					697.483	24.3249					648.444	35.4184					712.179	176.258
704.427	38.2611					767.098	16.8278					724.92	111.244					1005.57	411.871					700.256	138.681					650.251	3.33799					713.275	120.821
705.241	17.0301					768.479	16.7495					726.913	177.704					1020.83	38.8964					701.551	81.7023					651.984	18.8503					714.312	10.6911
707.829	9.38337					775.191	32.4943					728.49	36.1321					1022.17	4263.19					702.847	90.2334					654.262	12.8099					716.091	8.9934
709.047	78.8868					777.277	175.197					729.309	318.604					1023.41	1348.18					703.521	30.7489					655.217	8.0634					718.961	58.4922
710.063	421.484					790.812	51.1071					730.175	288.867					1028.25	55.3348					704.515	43.0541					656.399	47.4969					720.222	103.397
711.173	160.12					794.668	474.417					731.064	65.1011					1037.24	389.654					705.387	20.117					657.201	47.6825					721.292	36.8133
712.717	4.81512					795.391	876.379					732.515	32.4821					1038.35	433.733					707.56	61.7756					658.721	8.40845					722.283	82.8872
714.363	26.0037					796.148	17.6889					733.38	88.4115					1039.2	79.4819					708.563	140.269					660.134	13.2959					723.183	80.9773
715.54	29.7653					806.207	17.0535					734.706	19.2822					1061.53	113.427					709.626	209.515					662.322	35.3892					724.167	52.0546
716.601	31.0255					810.38	28.7999					735.735	37.9668					1079.19	3694.2					710.421	134.687					664.312	56.7352					724.882	67.0679
717.541	75.1212					812.152	920.279					738.013	47.8245					1080.29	958.902					711.543	122.057					666.336	18.833					725.62	50.4032
718.938	59.929					812.944	5.69269					738.861	486.216					1090.43	64.0756					712.482	24.5143					668.042	56.8988					726.268	31.202
719.921	39.2899					816.333	6.00926					739.946	74.1344					1097.33	1126.17					713.257	92.5551					668.901	35.006					727.071	15.441
720.528	170.737					829.371	26.7232					753.932	2.74364					1098.25	1157.87					714.137	3.79314					669.767	11.3263					728.821	42.708
721.505	23.5071					832.325	7.16575					757.432	33.2268					1098.86	99.0401					715.391	11.3865					671.024	7.24505					729.594	21.5346
722.687	182.121					842.192	15.5134					758.432	40.8308					1104.46	114.037					717.095	421.85					672.361	67.4982					731.153	97.0573
723.575	49.9458					852.379	110.761					766.464	10.0901					1122.12	101.354					718.311	100.989					673.303	76.9833					731.987	296.623
724.78	92.2324					866.129	28.2752					772.494	15.235					1132.36	820					719.573	34.3856					674.429	65.9237					732.796	90.8643
726.219	78.3181					867.69	16.6802					773.31	2.64516					1133.33	156.209					720.317	98.2255					675.402	94.2912					733.475	62.3084
727.998	28.8476					870.622	1043.18					774.526	9.85587					1136.04	102.676					721.325	43.8521					677.231	21.8597					734.342	51.9526
728.987	205.263					872.476	43.065					777.178	80.3504					1137.27	38.1364					722.591	94.4592					679.207	14.4106					734.968	35.4989
729.947	394.494					892.441	139.129					778.369	31.0655					1150.2	6680.53					723.571	31.2873					680.264	68.0613					735.978	12.9541
731.154	39.6426					905.321	12.0315					781.132	10.1911					1151.37	1468.49					724.62	16.1573					682.202	51.0805					738.026	204.682
731.97	141.158					906.997	19.7526					782.575	8.40055					1154.48	1523.05					725.635	28.6381					683.253	108.499					738.982	48.8332
734.303	59.0261					909.548	277.594					783.753	25.5395					1155.32	568.125					726.671	51.6728					684.317	48.6303					739.904	95.5717
735.267	97.9426					910.324	19.2916					785.555	16.0724					1156.23	165.225					727.526	7.72243					686.407	49.5963					740.579	2120.2
736.162	166.911					916.905	15.6989					792.882	14.345					1167.28	164.288					729.422	89.6988					687.546	12.5994					742.223	71.0143
737.561	97.6004					918.272	8.99014					794.152	21.286					1168.26	115.37					730.157	292.323					689.001	4.97592					742.966	4.32908
738.805	685.899					927.477	5112.5					794.771	11.2548					1175.42	97.2391					731.164	235.76					690.353	17.5611					743.652	2.94417
739.492	224.193					936.396	6.76988					795.377	149.975					1193.47	176.487					732.058	34.3099					691.829	1208.31					757.526	1.50333
740.16	10.7171					947.39	356.202					796.429	32.2121					1194.73	341.239					734.253	29.9864					692.439	504.593					758.449	2.93475
742.522	12.2353					962.207	22.0058					811.752	35.1852					1207.44	16.2964					735.2	11.6357					693.109	88.0419					759.407	17.6514
757.457	40.4162					965.276	4955.18					812.428	56.6892					1211.49	4971.2					736.477	76.4744					694.217	98.2926					760.39	14.6707
758.346	30.9753					970.556	21.5477					813.337	3.29684					1212.65	1406.14					738.923	870.088					695.85	18.1179					761.21	3.85729
759.283	10.0581					973.245	19.5393					815.343	3.0183					1287.07	54.3085					740.21	105.381					697.095	44.3215					767.305	13.8957
762.262	18.2375					976.566	5.37808					816.359	13.3716					1302.36	1131.14					741.612	10.0144					697.721	29.6661					768.313	11.16
765.777	15.5711					980.523	2.77136					823.018	9.17521					1303.59	727.168					757.459	15.4289					699.387	37.4328					769.039	19.6803
769.465	9.16583					983.388	21.0827					827.061	5.00243					1318.8	24.2223					769.671	3.82066					700.383	468.175					772.576	34.5842
777.224	69.393					991.802	37.2077					832.948	20.5862					1320.33	10408.2					776.186	6.18246					701.32	482.488					775.647	7.54349
778.227	46.9592					997.447	26.8539					836.381	7.78969					1321.44	3623					777.463	5.0577					702.469	288.631					778.095	34.9076
785.97	6.9257					1000.7	31.3586					838.519	4.05139					1526.26	13.6033					778.315	9.72476					703.369	73.3336					779.359	8.52971
789.535	7.8305					1003.88	72.8487					841.979	21.8525											779.006	2.25175					704.072	37.036					780.76	5.82996
790.997	3.36764					1004.56	122.318					846.096	12.7062											783.302	11.449					705.398	53.519					781.399	4.42162
792.295	3.57738					1015.41	55.5494					847.489	24.9908											790.059	12.5031					706.609	20.6221					784.53	3.9683
794.577	63.2415					1018.37	13.3925					848.09	8.94792											793.115	16.4573					709.762	294.902					794.407	39.7896
795.251	258.896					1021.77	143.095					849.297	2.30493											794.408	53.3469					710.375	552.317					795.346	64.364
796.229	85.0929					1022.39	971.388					850.105	16.7883											795.35	65.4373					711.313	954.781					796.213	61.7687
797.295	30.3323					1026.24	20.7978					852.862	18.0628											796.338	41.7449					712.255	267.033					797.333	116.623
802.515	44.1141					1029.35	21.2673					854.109	11.2518											797.497	5.39521					713.047	127.703					798.369	95.4427
806.371	26.6984					1030.65	18.9382					861.708	3.36698											799.363	3.88422					713.833	61.5268					801.543	12.0888
809.192	6.74408					1037.58	63.0025					863.117	5.79442											800.413	9.69401					715.617	18.9665					805.172	12.618
812.336	231.339					1050.23	39.8724					864.238	64.0921											801.239	3.55911					716.566	160.472					806.243	3.37239
813.254	11.0531					1061.57	85.3872					866.218	3.13593											802.278	2.97308					717.728	163.838					808.33	6.29507
818.436	33.4167					1077.24	15.6503					867.214	8.19611											805.226	9.41792					718.885	43.8608					811.679	1.30638
820.211	10.2618					1079.33	771.689					868.395	4.70496											812.136	135.08					720.174	116.46					812.396	27.8204
821.873	3.77898					1079.96	35.4335					870.514	145.81											813.173	39.574					721.307	166.413					813.351	70.2701
824.929	14.2146					1089.62	8.22683					871.625	19.1432											814.488	17.2269					722.367	217.637					813.957	38.2448
826.064	3.0911					1097.62	354.063					874.069	11.9782											819.247	3.7099					723.579	76.8516					814.602	39.2415
835.46	15.985					1115.63	6.3455					877.902	10.1803											842.208	10.647					725.146	193.825					815.703	45.6118
837.768	7.82829					1119.87	54.1311					882.611	15.5572											842.912	3.35076					725.864	68.9836					816.373	2.39831
844.303	7.24867					1121.43	9.74728					887.286	9.80436											847.845	2.86825					727.012	75.9419					826.205	5.27322
848.423	16.1197					1122.49	63.563					888.178	8.53545											848.547	8.20119					727.845	26.4226					827.59	13.5505
852.549	9.12181					1132.52	266.96					892.547	26.2762											852.894	28.3487					728.894	34.2724					837.484	7.12368
853.751	24.9607					1136.74	41.0209					894.468	10.7347											854.578	1.89701					730.4	488.685					844.567	9.66036
865.466	3.80277					1150.22	1492.12					895.674	17.419											861.835	20.8713					731.055	819.528					846.271	18.7593
867.237	12.7297					1150.91	7.30784					909.503	61.8634											863.441	12.4479					731.807	216.096					847.998	13.4332
870.291	128.152					1154.51	566.332					910.559	64.7862											865.332	14.3743					732.496	28.0808					849.596	18.6991
871.288	88.9666					1155.13	38.5718					911.402	10.502											866.312	20.2769					733.62	5.19928					851.34	19.8173
872.224	31.4061					1164.73	11.8664					912.477	9.02069											870.567	139.817					734.237	38.6378					853.306	9.25374
874.974	4.48094					1167.4	47.49					918.585	34.1915											871.619	9.58713					735.845	17.2802					853.95	10.8329
881.164	27.7512					1178.5	3.06349					922.3	30.9653											872.937	19.5566					737.118	73.1516					855.253	19.5114
887.074	28.3685					1181.88	12.7479					922.987	30.3418											875.07	15.0873					738.203	162.149					856.451	4.18354
888.382	29.895					1193.65	128.742					924.266	5.47983											876.872	37.8075					739.353	3234.74					857.219	6.42011
890.325	21.4955					1205.26	13.9801					925.492	8.5662											877.607	10.7593					740.114	1586.05					866.446	13.2204
891.499	27.0023					1207.79	8.51863					927.431	856.626											879.202	32.2337					741.128	86.521					870.487	14.9612
892.245	4.7496					1211.58	1064.46					928.469	89.2056											880.536	11.2171					741.901	22.8823					871.359	78.6996
893.347	38.7465					1212.49	46.1395					935.541	61.1991											886.292	14.8918					746.539	2.21663					872.425	73.8136
894.356	24.057					1221.08	19.1319					940.282	5.99647											892.249	6.9715					750.581	12.8062					873.442	48.6843
896.062	1.97587					1243.52	5.65284					941.326	7.15057											898.038	22.5993					757.077	23.9277					874.496	22.6537
896.967	22.3917					1249.31	8.99762					947.36	72.0349											909.371	21.1975					757.71	29.8325					876.599	3.99076
897.828	31.5478					1261.63	10.9366					948.348	58.5691											910.345	34.743					758.515	53.1373					877.622	4.9453
900.462	10.5214					1264.68	22.7861					963.493	10.7636											911.69	3.06834					759.526	8.02019					879.457	7.74326
902.068	6.68282					1277.3	11.902					965.264	916.847											915.658	15.5561					767.073	3.0287					884.385	7.99814
903.333	29.3409					1280.6	27.5211					966.306	80.9857											918.939	13.1448					767.979	2.1543					886.942	29.1333
904.686	14.3033					1302.57	265.118					970.01	37.3274											920.144	2.73586					769.251	7.13956					889.452	30.817
905.466	26.3885					1320.46	2159.96					976.594	5.10225											922.628	2.42518					770.375	18.0942					890.235	13.8867
906.547	4.04317					1509.3	9.34757					989.216	1.55842											925.541	5.88011					777.3	36.5498					893.222	55.8668
909.337	90.6973					1617	5.31425					990.536	21.189											927.423	404.973					778.412	75.5066					894.39	19.0128
910.089	31.5471					1989.42	7.49969					994.36	12.908											928.527	230.495					783.611	25.3847					895.333	10.9105
910.832	52.5634											997.271	16.3201											929.242	57.0631					785.191	2.31164					898.447	25.1307
913.781	22.808											999.544	13.7549											930.132	23.1275					787.605	7.50802					906.402	15.6272
914.463	25.5643											1004.44	63.1468											930.948	23.6049					792.054	15.992					907.49	5.35118
923.656	80.1178											1005.36	15.5484											934.437	39.5991					795.134	362.52					910.359	15.3528
924.54	27.6774											1007.21	37.7342											935.633	39.1142					796.23	486.121					911.232	16.6458
925.214	15.7953											1008.62	8.21058											936.938	14.8814					797.198	117.414					912.241	38.6712
927.375	908.368											1009.49	13.1324											941.351	20.0482					798.406	18.1919					912.859	20.2469
928.484	108.592											1010.51	16.877											942.29	6.30076					801.498	74.0598					913.588	4.06514
929.53	94.0133											1014.61	3.83466											947.43	17.1799					802.692	13.5551					920.946	40.3437
930.212	11.7327											1018.99	21.8656											948.369	10.9582					803.403	7.49739					923.521	19.4416
932.163	5.07093											1020.25	20.9928											949.315	6.39412					807.205	5.90634					924.329	5.95434
933.4	7.59522											1021.02	16.4541											950.759	5.98812					808.476	4.74385					926.223	23.558
935.505	22.5317											1022.25	164.6											952.242	5.10655					809.449	13.2247					927.231	26.7444
938.078	9.38809											1023.07	46.111											957.024	17.0249					810.58	17.8907					928.419	231.191
940.109	2.86788											1023.8	2.57705											962.55	7.27017					812.216	213.565					929.497	456.842
945.557	6.6555											1025.4	22.6176											964.561	72.856					813.307	307.785					930.401	338.506
947.374	137.351											1030.41	2.42664											965.282	604.192					814.458	42.5326					931.531	72.7255
948.56	41.1892											1034.17	7.22062											966.401	263.033					816.29	1.03586					932.51	16.4453
949.425	60.6102											1037.48	19.9676											967.364	29.03					817.358	5.05755					933.508	28.1992
952.786	23.1554											1042.31	7.2921											972.014	7.68239					818.253	23.0596					935.291	6.95202
954.645	18.6858											1047.09	15.7356											972.979	8.63213					819.208	19.4995					937.719	9.77607
959.134	8.48609											1048.28	32.0171											977.134	10.8924					825.265	30.7032					939.208	14.4324
959.889	18.1478											1051.4	9.19946											984.55	17.4413					825.918	26.3514					940.709	12.1794
962.767	9.43974											1055.22	4.41688											988.531	28.5933					826.563	18.3689					943.216	10.7827
963.383	1.79049											1061.49	10.9503											989.227	5.34113					834.82	7.57259					947.06	12.6566
965.224	1141.62											1065.44	17.6174											990.218	8.56598					835.886	27.3396					947.682	2.65375
966.341	315.598											1066.46	8.48506											992.547	8.6213					842.641	8.22759					948.368	19.0291
967.565	18.4726											1079.17	110.534											996.327	8.7765					847.268	6.6859					949.379	17.02
970.093	6.3825											1080.22	39.9305											999.356	7.04239					852.155	44.4801					950.659	45.2604
978.494	40.284											1097.56	22.958											1004.11	22.044					853.466	56.0228					957.565	5.78267
992.19	17.9285											1098.87	1.96304											1005.27	71.9781					854.63	8.15607					959.192	5.53154
993.457	4.18527											1104.88	7.20579											1006.19	44.1591					856.931	8.64112					965.094	127.512
994.627	8.08284											1108.63	17.0033											1009.22	4.2756					865.626	16.0567					966.21	347.648
1002.61	19.4416											1118.47	2.16176											1016.26	14.1103					866.798	4.31248					967.348	734.241
1004.17	23.6739											1119.83	5.52335											1017.53	7.72552					868.303	6.92035					968.287	479.109
1005.04	35.4944											1120.46	8.30453											1018.55	11.1447					869.053	2.57308					969.365	147.237
1007.37	23.0538											1121.53	2.30534											1020.7	15.5179					870.295	198.683					973.627	5.71327
1008.08	11.6893											1125.16	8.21806											1022.12	90.7607					871.351	385.465					983.193	14.1524
1009.54	15.606											1132.53	18.3488											1023.09	38.0472					872.54	114.568					984.035	14.5955
1012.51	8.16408											1133.39	10.7486											1024.53	20.0291					873.871	7.63249					985.651	5.5262
1014.34	14.8373											1150.26	181.649											1025.13	4.02096					876.986	12.8912					995.943	10.1982
1022.2	300.308											1151.33	29.978											1026.01	5.61684					881.512	2.55686					1001.26	9.51187
1023.35	66.3615											1153.9	30.0865											1027.61	14.9977					882.858	7.47619					1004.06	26.4975
1023.96	6.54121											1154.56	88.7343											1029.17	19.7483					888.5	61.3422					1006.06	11.5209
1037.01	59.2016											1155.82	13.1087											1029.78	23.0889					889.564	23.5636					1006.73	10.6017
1037.77	9.01169											1163.69	12.5405											1031.69	15.9008					891.436	2.87024					1007.91	15.525
1038.48	5.68355											1167.84	32.8479											1035.41	2.75902					893.629	14.2502					1009.59	11.33
1039.69	1.58389											1174.31	11.1122											1037.41	16.4102					894.433	3.13064					1010.23	33.573
1046.05	53.3199											1181.43	8.32904											1038.4	1.64315					898.477	3.74285					1011.52	15.1487
1047.05	29.7703											1184.6	10.3886											1039.15	18.6428					904.196	16.8751					1014.31	2.82315
1057.47	6.28238											1193.56	39.5786											1043.92	6.43588					906.372	3.22409					1016.45	2.11056
1058.38	10.473											1195.61	6.60841											1048.44	14.0824					909.308	33.4776					1017.23	11.1504
1061.06	9.18547											1208.68	9.65315											1053.05	3.14825					910.407	65.647					1022.51	40.8991
1062.59	7.1051											1211.69	93.004											1054.63	5.39558					911.199	51.2122					1023.4	125.655
1064.74	9.94797											1212.56	35.0549											1056.71	12.3967					917.578	3.02327					1024.34	129.966
1066.34	15.4862											1221.05	11.0858											1061.51	4.31051					920.15	2.72582					1025.31	162.184
1069.28	9.36285											1223.42	2.70749											1065.95	6.34477					920.862	15.2019					1026.25	36.3491
1075.72	8.00052											1247.31	8.14942											1068.83	16.6888					922.309	2.45593					1028	20.2769
1079.49	96.2285											1252.4	15.1886											1070.34	4.17631					924.114	22.1438					1031.68	31.4765
1080.56	37.2575											1253.06	2.57149											1074.19	9.53414					925.312	21.2445					1032.63	4.45527
1082.46	12.7435											1256.5	21.898											1079.15	55.6426					927.641	1412.73					1037.53	15.8568
1086.49	18.2656											1263.61	4.30583											1080.13	58.8819					928.519	1260.1					1040.26	5.4069
1087.2	13.4243											1270.27	2.15159											1080.78	9.15161					929.471	504.365					1049.8	21.7901
1097.45	75.8338											1276.53	7.88182											1090.43	28.9289					930.588	60.5417					1053.21	26.2587
1098.67	23.9129											1279.52	10.1343											1095.47	3.24094					938.477	14.1332					1061.3	4.62189
1108.21	15.2114											1293.59	11.9307											1096.62	5.10846					939.825	5.24517					1062.32	3.46966
1112.59	24.03											1302.37	44.167											1097.68	55.9119					944.489	91.9933					1068.36	9.59547
1113.35	4.94677											1303.46	15.5973											1098.61	23.346					945.488	5.41426					1069.82	23.6405
1117.59	8.33205											1306.91	2.131											1101.41	3.73284					947.175	73.6943					1070.63	12.9376
1119.37	6.31505											1320.27	442.768											1105.15	11.4889					948.214	190.493					1079.82	11.1217
1123.27	15.5095											1321.44	106.473											1109.98	16.6895					949.318	54.8937					1081.29	116.501
1124.38	4.2158											1322.5	4.44205											1111.3	14.0862					952.313	15.6531					1082.25	138.171
1132.44	76.3851											1328.35	5.33911											1132.44	38.0363					953.438	7.09082					1083.45	25.9738
1133.64	11.9994											1349.53	5.62056											1133.07	18.6327					957.235	26.5621					1084.17	16.4126
1135.18	12.1346											1355.45	19.0647											1142.1	3.36832					958.088	14.7493					1089.31	7.18117
1135.91	4.44148											1417.98	6.29532											1143.41	8.50395					961.977	18.9081					1091.53	22.7854
1136.84	16.4132											1424.38	5.28974											1150.29	127.402					962.777	7.76502					1094.65	5.16818
1149.21	8.83567											1512.63	5.23452											1151.15	75.3857					965.296	1517.3					1097.78	6.11177
1150.26	335.864																							1152.44	8.6246					966.248	2688.06					1098.52	14.5919
1151.34	51.6083																							1154.6	33.8563					967.259	737.842					1099.79	31.7343
1152.35	19.9601																							1155.51	20.3133					968.24	66.0505					1100.79	14.0845
1154.35	58.2095																							1156.21	11.1119					970.613	3.7771					1103.53	12.2985
1155.39	15.3139																							1163.09	6.78859					984.385	6.46648					1107.63	9.48768
1167.47	19.8892																							1174.53	10.5132					985.522	8.60608					1108.53	15.7313
1168.4	7.91682																							1175.45	25.8228					987.258	12.5216					1111.25	5.70402
1171.65	1.62261																							1176.57	8.1822					988.838	53.9358					1112.76	1.74469
1173.64	7.45891																							1193.71	24.4144					990.939	1.96978					1124.42	4.36657
1174.56	5.2193																							1209.58	16.701					992.547	34.2312					1125.31	18.9561
1175.72	17.1449																							1211.66	31.8275					993.249	6.12176					1129.04	13.4848
1178.52	12.9001																							1212.63	28.4192					995.353	16.4605					1134.31	2.92931
1179.59	15.9671																							1213.26	3.80219					999.67	23.5667					1135.56	12.2375
1181.4	3.44434																							1238.6	4.70747					1002.96	33.827					1150.42	21.0498
1182.4	15.014																							1239.27	4.69139					1004.19	66.2068					1151.41	88.0415
1183.46	2.34323																							1249.92	13.4581					1005.31	63.7158					1152.46	168.874
1193.58	3.63348																							1253.32	7.64448					1006.45	28.9629					1153.3	209.237
1194.68	4.39575																							1256.86	16.5913					1008.01	15.8152					1154.39	59.4705
1197.17	13.5821																							1260.58	8.91848					1009.25	70.296					1155.57	10.6343
1205.09	8.76742																							1262.47	5.7152					1010.3	54.5318					1156.54	38.2061
1206	4.40681																							1264.35	12.3956					1011.17	11.2577					1157.8	82.7389
1208.77	6.49319																							1267.43	7.61848					1014.12	9.88467					1158.68	37.7863
1210.9	16.721																							1285.83	13.8779					1015.69	5.03775					1164.45	17.4992
1211.64	230.855																							1288.61	1.76276					1020.17	2.62319					1169.1	6.39751
1212.7	22.7051																							1294.35	2.12505					1020.81	10.7461					1170.57	16.1369
1222.67	5.71007																							1302.54	41.1426					1022.27	192.276					1171.64	13.3719
1234.23	10.8128																							1303.64	88.4299					1023.37	436.606					1174.54	3.02049
1234.95	8.8693																							1304.62	66.7641					1024.41	125.411					1175.49	58.0907
1243.43	12.2584																							1305.31	2.39478					1025.32	11.3116					1176.49	32.5107
1245.32	13.1836																							1320.37	217.089					1027.32	15.8065					1177.39	3.01126
1255.16	8.00278																							1321.22	43.7835					1028.37	5.16542					1182.27	7.59426
1262.9	16.3178																							1322.25	38.0273					1030.03	37.6271					1187.47	2.56842
1279.39	5.2772																							1322.95	10.7878					1031.47	61.2299					1194.57	18.0083
1285.42	8.34098																							1323.61	15.8951					1032.4	39.6942					1196.54	6.59888
1293.36	8.01416																							1349.36	5.96302					1033.5	2.51769					1201.67	13.8656
1300.29	6.40594																							1355.08	10.1399					1036.53	16.7089					1203.33	7.3787
1301.44	15.0615																							1376.06	6.87099					1037.34	20.2369					1210.51	10.7826
1302.27	43.9497																							1534.46	11.36					1038.24	4.73706					1212.8	20.8147
1303.4	54.9675																							1567.93	2.62362					1039.14	4.78445					1213.44	40.0802
1316.64	1.99572																							1707.43	2.47071					1041.29	3.22084					1214.57	189.735
1318.27	1.98623																							1935.04	5.03097					1045.36	4.2626					1215.57	25.7284
1320.37	500.187																													1046.35	4.84216					1248.57	12.0167
1321.37	222.909																													1051.37	3.38806					1253.05	26.1173
1345.44	6.3359																													1052.27	3.39111					1268.56	17.2715
1347.82	8.25389																													1053.45	11.3392					1271.47	7.98379
1349.58	8.3414																													1055.31	5.2108					1283.63	5.03144
1358.5	28.4953																													1056.56	21.4905					1285.77	10.678
1379.49	1.75076																													1057.81	12.5899					1286.73	13.6013
1492.08	5.46018																													1061.77	21.1115					1288.74	6.78523
1795.83	7.55555																													1062.67	15.4332					1303.5	16.3847
																														1064.19	4.26539					1304.34	106.288
																														1065.87	7.6652					1305.32	96.713
																														1068.4	14.77					1306.54	24.3004
																														1071.51	14.5928					1307.61	32.7246
																														1072.69	6.03282					1308.91	15.6613
																														1079.13	81.9073					1321.81	66.3661
																														1080.3	357.534					1322.62	131.588
																														1081.01	79.8313					1323.41	454.404
																														1081.71	57.7722					1324.35	174.091
																														1082.65	10.3402					1325.36	55.4275
																														1083.39	10.4555					1916.5	3.41853
																														1087.41	9.13106
																														1090.23	7.17729
																														1091.59	4.76642
																														1093.89	16.2853
																														1097.64	94.1901
																														1098.57	121.488
																														1099.56	49.5471
																														1100.42	40.7583
																														1104.82	9.6715
																														1108.66	13.9521
																														1109.78	11.8268
																														1118.34	18.456
																														1120.75	14.7762
																														1121.6	18.2842
																														1123.34	6.76492
																														1127.11	2.40254
																														1128.57	2.48708
																														1132.59	47.8283
																														1133.42	50.1239
																														1134.65	13.2376
																														1136.84	5.85946
																														1138.92	6.26937
																														1145.79	11.065
																														1148.48	17.7054
																														1150.21	248.418
																														1151.26	781.22
																														1152.22	122.163
																														1153.18	25.0374
																														1154.55	37.8903
																														1155.46	173.071
																														1156.3	56.033
																														1157.15	21.9337
																														1158.33	7.28118
																														1160.42	10.4484
																														1167.79	38.3848
																														1168.46	28.8896
																														1170.11	12.1379
																														1171.65	4.10482
																														1173.4	23.7619
																														1174.52	255.158
																														1175.43	162.182
																														1176.27	72.9504
																														1177.37	24.7786
																														1185.22	3.9851
																														1187.06	16.1265
																														1191.37	7.89763
																														1192.82	24.2401
																														1193.51	79.4895
																														1194.5	82.1545
																														1195.35	21.8955
																														1208.17	16.4523
																														1209.69	25.8786
																														1211.52	140.757
																														1212.55	447.737
																														1213.58	167.316
																														1214.34	12.8834
																														1223.69	11.1177
																														1224.67	4.9733
																														1225.47	6.66
																														1229.61	15.0023
																														1230.51	41.4361
																														1234.61	16.3131
																														1239.66	2.37551
																														1247.45	2.9457
																														1249.6	1.76405
																														1250.58	18.3293
																														1251.22	14.5659
																														1256.62	8.064
																														1258.52	11.2413
																														1265.55	7.11915
																														1268.72	9.53973
																														1269.56	3.22689
																														1274.66	11.5558
																														1278.13	9.52881
																														1284.72	2.51278
																														1285.45	59.8194
																														1287.49	6.93409
																														1296.33	19.8333
																														1303.44	686.768
																														1304.42	397.79
																														1305.75	99.6028
																														1307.94	4.30663
																														1310.69	2.51056
																														1311.55	10.0349
																														1320.47	252.629
																														1321.39	1223.7
																														1322.33	606.073
																														1323.27	74.7884
																														1324.26	49.6961
																														1340.67	4.31516
																														1349.38	13.284
																														1365.45	2.3818

## Sheet: suH4 0ac
SPECTRUM - MS
Leonen-H4K12su-Chromatin-MSMS.RAW
ITMS + c NSI d Full ms2 776.24@cid35.00 [200.00-2000.00]
Scan #: 4285
RT: 30.63
Data points: 314
Mass	Intensity
228.136	6.92732
236.728	3.87966
261.933	17.4245
269.323	4.69091
278.072	7.10296
282.257	16.0584
285.191	1.31984
288.231	5.67591
297.697	5.1779
298.981	9.81125
306.156	5.90428
314.175	11.9005
325.973	3.16362
337.091	3.20913
341.072	20.8143
342.322	13.3538
347.233	4.67559
355.141	28.3003
356.447	3.03193
358.267	8.04612
359.341	79.9823
366.267	10.0523
370.12	17.8204
376.601	5.93962
377.661	3.20476
378.819	1.87591
386.74	6.63131
388.535	5.56122
390.041	15.0006
390.871	1.14399
392.069	12.8618
394.197	179.869
411.089	31.1005
412.492	2.07761
414.192	12.3286
417.494	7.94561
418.31	4.20721
423.235	2.84735
423.86	15.2877
428.681	24.2433
430.311	7.22445
431.867	2.46344
432.985	4.35267
440.907	8.28689
442.553	13.6751
443.41	10.1876
446.915	3.75837
449.046	5.5427
450.058	3.53924
451.049	7.49059
457.2	2.93186
464.175	6.94333
469.288	5.34139
473.123	6.83396
474.256	2.35919
484.107	10.0872
485.007	4.95556
486.216	10.3908
487.262	33.7852
494.587	43.8275
501.741	11.0289
508.187	3.52111
509.528	22.4191
511.189	9.03744
513.188	16.978
515.243	16.1042
518.176	16.8331
519.383	6.144
520.306	10.501
522.994	4.47037
524.919	8.46845
526.77	23.4038
527.412	12.7512
528.288	4.83917
530.487	20.5137
532.15	8.81965
532.937	6.43894
535.943	22.7127
538.416	11.3183
544.329	317.744
545.182	6.99386
546.167	11.6243
548.265	5.62279
549.832	27.6602
551.186	19.7102
551.928	4.49242
556.142	1.627
556.93	6.5111
558.228	4.4881
567.662	53.142
571.043	1.72387
571.662	2.76049
572.914	11.6315
574.037	131.382
574.977	27.2018
578.208	17.276
579.105	3.35734
582.037	3.48339
582.821	4.26014
583.585	35.7003
586.265	10.1617
588.265	9.10327
589.414	45.7632
593.092	5.1063
596.316	117.81
597.097	4.57642
598.384	41.3787
599.294	78.5334
600.638	20.43
602.48	19.688
603.958	4.43806
604.903	13.2413
606.533	11.3121
607.206	51.3244
608.123	3.30342
608.791	14.2327
609.906	16.6085
610.914	6.08608
612.049	13.2306
615.893	6.29222
616.529	9.65725
618.532	19.3817
621.415	4.64376
626.798	21.7865
627.756	64.5717
628.943	2.6134
630.242	2.37155
631.316	10.9628
636.091	2.94269
637.259	9.39396
638.729	17.5715
640.2	15.5132
641.573	2.38128
644.082	9.69488
644.727	11.2492
647.428	21.7376
650.435	7.92803
653.344	157.572
656.085	8.80695
660.285	48.1901
668.268	13.3643
671.565	17.0699
673.135	41.1745
675.372	15.0624
678.082	2.44322
679.503	18.1782
681.431	22.6062
683.12	19.0938
684.261	2.58999
685.172	15.6232
688.17	7.87626
690.237	17.5912
692.696	8.27105
694.007	10.2527
695.251	35.8289
697.252	33.798
698.899	13.6551
699.748	16.2383
701.011	63.9018
702.243	182.237
703.204	22.3561
704.769	19.0213
707.592	8.15424
708.224	33.5298
710.372	38.3166
711.422	27.9284
712.515	11.2048
714.064	15.019
717.826	3.83528
719.466	18.5108
720.195	29.7506
721.364	24.1956
724.455	24.2222
725.329	10.3456
726.312	24.8523
728.373	64.3461
729.317	38.382
731.181	15.5918
732.572	26.2328
733.652	3.67607
734.319	16.1216
738.133	180.702
739.133	144.729
740.121	34.914
741.409	2.18774
742.941	25.1079
744.249	41.1646
744.925	33.3982
745.733	14.2815
746.354	5.69732
747.562	19.7095
748.187	89.4742
750.623	70.5743
752.052	28.9263
752.796	36.763
755.143	14.7418
757.1	180.135
758.132	129.041
759.294	25.2966
760.867	7.15174
761.652	2.05539
763.252	43.3328
764.288	35.0353
765.632	78.7124
766.564	146.911
767.257	46.6482
785.366	27.2483
788.167	10.4793
805.616	18.5193
811.62	19.4804
814.083	4.83164
823.26	52.2597
823.981	21.3112
825.127	12.1767
827.747	2.03003
828.832	4.76629
830.363	9.51786
840.078	37.6643
841.438	6.10183
849.449	26.8606
855.781	30.9732
862.535	31.1325
871.41	6.67237
878.623	3.66538
882.214	11.8614
884.904	41.276
885.599	8.89599
888.391	19.0473
889.422	17.1866
894.323	1.86791
895.032	13.0566
898.181	18.458
904.682	27.5533
908.449	15.5932
916.231	2.29754
918.512	10.5519
927.466	9.22768
928.13	20.1663
954.879	27.047
955.597	150.978
956.49	11.0618
957.354	6.08884
960.855	33.6606
966.069	20.719
973.651	15.2813
974.53	3.04815
977.57	15.2658
982.316	3.13607
983.882	14.9082
986.423	3.42988
987.026	15.911
988.203	2.64948
989.624	10.5508
995.443	10.7408
996.363	6.49793
1001.39	3.32976
1006.39	16.1557
1007.3	142.051
1008.11	32.8009
1014.46	7.35989
1019.45	38.5245
1024.07	22.8109
1026.95	10.2739
1035.24	5.19054
1046.31	9.27383
1052.22	16.2097
1054.46	13.0975
1056.65	6.34765
1059.9	11.7924
1064.47	22.8435
1065.63	20.5418
1066.7	25.6191
1070.48	9.45349
1082.82	11.4302
1084.74	5.7795
1086.01	13.9547
1094.21	4.96123
1106.63	8.83203
1107.51	19.0187
1115.49	3.06748
1119.38	14.577
1121.61	14.4673
1125.21	8.17447
1128.9	17.8198
1133.76	5.53267
1139.51	10.5378
1144.29	8.9789
1148.12	18.1874
1164.34	3.33149
1178.5	2.57883
1191.41	2.9173
1192.35	38.4593
1193.46	14.2521
1196.86	5.01835
1197.69	10.1929
1235.69	6.97634
1236.94	10.6836
1246.17	6.43251
1248.22	1.30462
1253.61	21.0726
1254.72	3.35381
1289.08	10.4418
1306.24	7.88577
1309.68	28.0511
1313.68	3.93257
1335.93	6.85525
1358.81	8.41603
1359.46	10.1034
1375.4	12.4035
1376.56	77.6511
1395.11	7.91537
1402.25	19.6035
1824.51	9.07369
1917.94	2.7986

## Sheet: suH4 2ac list
SPECTRUM - MS						SPECTRUM - MS						SPECTRUM - MS							215.363	0.0194115	fragment ion		fragment ion		K5ac	K5pr			Species	Ion	% total intensity			Avg. ratio
Leonen-H4K12su-Chromatin-MSMS.RAW						Leonen-H4K12su-Chromatin-MSMS.RAW						Leonen-H4K12su-Chromatin-MSMS.RAW							218.043	0.0262401			b2		0.316005	nd			K5ac,K8ac	b5	2.096	2.308	1.77	71.6
ITMS + c NSI d Full ms2 762.19@cid35.00 [195.00-2000.00]						ITMS + c NSI d Full ms2 762.52@cid35.00 [195.00-2000.00]						ITMS + c NSI d Full ms2 762.64@cid35.00 [195.00-2000.00]							225.143	0.00426996			b2		0.235564	nd			K5pr,K8pr		nd	0.071	0.016
Scan #: 3975		SUM				Scan #: 4037		SUM				Scan #: 4106		SUM					226.953	0.030096			b2		0.263994	nd			K5ac,K8ac	b6	2.603	2.835	2.9	33.1
RT: 28.92		35935				RT: 29.27		251900				RT: 29.65		72807.9					227.126	0.0368844			b3		0.319451	nd			K5pr,K8pr		0.053	nd	0.17
Data points: 579						Data points: 315						Data points: 487							227.358	0.00510736			b3		0.251397	nd			K12pr,K16ac	y6	0.038	0.08	nd	0.0444724
Mass	Intensity	Normalized intensity				Mass	Intensity	Normalized intensity				Mass	Intensity	Normalized intensity					228.281	0.00744727			b3		0.629792	nd			K12pr,K16pr		1.227	1.378	1.375
215.363	6.97552	0.0194115				227.358	12.8654	0.00510736				226.953	21.9122	0.030096					229.373	0.00696446			b4		0.639188	0.0207581			K12pr,K16ac	y8	0.027	0.013	0.138	0.080036
218.043	9.42938	0.0262401				228.281	18.7597	0.00744727				229.373	5.07067	0.00696446					230.054	0.0178066			b4		0.485103	0.0506514			K12pr,K16pr		0.815	0.732	0.677
225.143	1.53441	0.00426996				252.022	15.1434	0.00601168				230.22	3.6834	0.00505907					230.22	0.00505907			b4		0.328447	0.0883468
227.126	13.2544	0.0368844				252.838	23.8604	0.00947215				234.204	12.5168	0.0171916					234.204	0.0171916
230.054	6.39879	0.0178066				267.386	43.1928	0.0171468				245.048	26.2043	0.0359911					240.183	0.0243964			fragment ion		K5ac,K8ac	K5,8 ac/pr	K5pr,K8pr
240.183	8.76683	0.0243964				282.106	17.85	0.00708614				250.133	19.652	0.0269916					244.34	0.00660848			b5		2.09638	0.0562747	0.0156457
244.34	2.37476	0.00660848				283.936	796.018	0.316005				256.165	14.9738	0.0205662					245.048	0.0359911			b5		2.30789	0.0227515	0.0713217
247.319	9.97532	0.0277593				285.172	407.886	0.161923				260.482	8.82053	0.0121148					247.319	0.0277593			b5		1.77016	0.0395158	-
248.368	2.912	0.0081035				285.993	27.2515	0.0108184				262.03	12.029	0.0165215					248.368	0.0081035			b6		2.60285	0.0500889	0.0532654
249.861	4.75378	0.0132288				289.143	36.7109	0.0145736				264.007	2.92378	0.00401574					249.861	0.0132288			b6		2.90038	0.312293	0.17032
250.912	3.7086	0.0103203				302.168	421.983	0.16752				267.164	3.97479	0.00545929					250.133	0.0269916			b6		2.83467	0.0329695	nd
253.891	8.60137	0.0239359				303.242	30.9255	0.0122769				278.206	7.72143	0.0106052					250.912	0.0103203			b7		5.46474	1.11447	nd
260.253	12.3199	0.0342839				307.022	56.3415	0.0223666				279.128	11.9316	0.0163877					252.022	0.00601168			b7		6.03338	3.89023	nd
261.209	5.76369	0.0160392				323.284	146.212	0.0580434				284.036	171.509	0.235564					252.838	0.00947215			b7		5.90348	4.70875	nd
262.186	5.19889	0.0144675				326.876	62.475	0.0248015				285.136	82.5213	0.113341					253.891	0.0239359			b8		1.22197	nd	nd
262.958	11.2436	0.0312887				328.055	31.6218	0.0125533				286.445	4.31473	0.00592619					256.165	0.0205662			b8		0.670381	nd	nd
273.103	2.59286	0.00721541				331.071	48.1511	0.0191151				288.117	11.8543	0.0162816					260.253	0.0342839			b8		0.988403	nd	nd
274.744	1.44128	0.0040108				338.192	19.4339	0.00771491				293.081	14.1648	0.019455					260.482	0.0121148
275.917	9.5646	0.0266164				341.066	804.699	0.319451				301.973	60.7009	0.0833713					261.209	0.0160392			fragment ion		K5,8,12 ac/ac/pr	K5,8,12 ac/pr/pr
277.213	5.20785	0.0144924				342.018	288.975	0.114718				302.666	34.4285	0.0472868					262.03	0.0165215			b9		5.36492	0.192965
281.249	5.36203	0.0149215				343.141	113.938	0.0452315				307.893	5.85859	0.00804665					262.186	0.0144675			b9		5.69515	0.112142
282.171	4.77588	0.0132903				346.521	147.126	0.0584066				312.819	7.56496	0.0103903					262.958	0.0312887			b9		4.87264	-
283.342	11.1393	0.0309986				351.968	23.8737	0.00947744				314.208	14.8186	0.020353					264.007	0.00401574			b10		1.07912	0.107
284.127	94.8665	0.263994				353.23	35.7827	0.0142051				315.225	11.96	0.0164268					267.164	0.00545929			b10		1.01407	0.0256708
285.197	59.3435	0.165141				359.215	3999.78	1.58784				318.447	3.51909	0.00483339					267.386	0.0171468			b10		1.07969	0.0812666
296.969	1.6149	0.00449395				360.288	571.323	0.226805				319.093	8.38826	0.0115211					273.103	0.00721541			b11		0.716403	0.0144319
297.891	4.96477	0.013816				360.919	16.796	0.00666771				320.271	10.068	0.0138282					274.744	0.0040108			b11		0.633993	0.0374556
302.266	8.83549	0.0245874				366.217	109.988	0.0436631				322.307	11.5238	0.0158277					275.917	0.0266164			b11		0.535794	0.0424871
303.903	13.9425	0.0387992				370.431	60.7364	0.0241113				323.312	12.6488	0.0173729					277.213	0.0144924			b12		1.33452	0.0381264
304.865	3.4213	0.00952079				379.257	63.9706	0.0253952				324.435	3.63287	0.00498967					278.206	0.0106052			b12		1.09981	0.0954547
310.148	7.02143	0.0195393				379.898	57.1693	0.0226952				325.139	7.29042	0.0100132					279.128	0.0163877			b12		1.33711	-
312.959	2.39235	0.00665744				381.413	17.2194	0.00683582				329.399	10.845	0.0148954					281.249	0.0149215
314.276	21.0666	0.0586242				386.565	30.196	0.0119873				335.23	3.46459	0.00475853					282.106	0.00708614			fragment ion		K16pr	K16ac
314.951	8.26557	0.0230014				394.293	78.0163	0.0309711				338.332	13.3332	0.0183128					282.171	0.0132903			y2		1.41747	0.0595638
319.179	5.58528	0.0155427				396.326	60.7673	0.0241236				341.16	458.538	0.629792					283.342	0.0309986			y2		1.58784	0.0350961
323.235	49.5064	0.137766				397.918	1610.12	0.639188				342.224	83.9469	0.115299					283.936	0.316005	b2		y2		1.60051	nd
325.366	9.84711	0.0274025				398.933	157.322	0.062454				343.201	7.66465	0.0105272					284.036	0.235564	b2		y3		0.936818	0.0512714
325.996	6.01633	0.0167422				400.394	41.8163	0.0166003				345.234	43.3671	0.0595638					284.127	0.263994	b2		y3		0.546406	0.00738766
326.853	4.64144	0.0129162				405.257	25.6726	0.0101916				352.189	4.41063	0.0060579					285.136	0.113341			y3		0.815175	0.0655554
330.297	1.08622	0.00302274				412.176	222.546	0.0883468				359.271	1165.3	1.60051					285.172	0.161923			y4		1.457	0.0488684
331.401	14.9961	0.0417311				415.172	1251.87	0.496969				360.265	163.038	0.223929					285.197	0.165141			y4		1.87893	0.0460098
334.859	6.48853	0.0180563				416.214	129.153	0.0512714				370.138	27.3535	0.0375694					285.993	0.0108184			y4		1.77522	0.062463
340.449	20.7776	0.0578198				425.01	25.5703	0.010151				377.477	6.44341	0.00884989					286.445	0.00592619			y5		8.82457	0.118662
341.085	90.3395	0.251397				427.034	63.5581	0.0252315				380.821	6.55848	0.00900793					288.117	0.0162816			y5		10.5109	0.17287
341.962	49.0882	0.136603				430.249	2359.85	0.936818				382.176	10.6877	0.0146793					289.143	0.0145736			y5		8.304	0.029019
342.593	4.57356	0.0127273				431.1	204.679	0.0812541				383.306	4.12672	0.00566796					293.081	0.019455
345.438	12.6118	0.0350961				448.323	68.3663	0.0271402				384.071	14.6946	0.0201827					296.969	0.00449395	297.4		fragment ion		K12pr,K16pr	K12,16 ac/pr	K12ac,K16ac
346.29	13.7173	0.0381724				453.571	69.747	0.0276883				397.165	74.6635	0.102549					297.891	0.013816	299		y6		1.37481	0.0381318	0.114577
354.186	10.9896	0.0305818				455.252	302.602	0.120128				398.119	353.193	0.485103					301.973	0.0833713			y6		1.37843	0.0803412	0.018877
356.026	1.87869	0.00522801				456.324	255.877	0.101579				399.086	37.637	0.0516936					302.168	0.16752			y6		1.2271	nd	0.0195762
358.042	3.3232	0.00924781				469.317	341.994	0.135765				401.052	14.0912	0.0193539					302.266	0.0245874			y7		6.68985	nd	nd
359.193	509.368	1.41747				470.418	64.0105	0.025411				403.044	6.13221	0.00842246					302.666	0.0472868			y7		6.52171	nd	nd
360.224	19.2008	0.053432				473.201	115.899	0.0460098				409.277	13.1049	0.0179993					303.242	0.0122769			y7		7.79317	nd	nd
362.036	18.7488	0.0521741				474.429	20.1225	0.00798828				411.581	15.1135	0.0207581					303.903	0.0387992			y8		0.677195	0.13788	nd
366.956	6.45145	0.0179531				476.199	24.6583	0.00978891				412.209	22.4234	0.030798					304.865	0.00952079			y8		0.814741	0.0269255	nd
375.498	39.7259	0.110549				477.295	19.5261	0.00775153				415.042	448.2	0.615592					307.022	0.0223666			y8		0.731816	0.0132166	nd
376.287	38.6287	0.107496				481.362	59.9719	0.0238078				415.765	48.9404	0.0672186					307.893	0.00804665			y9		4.04262	0.0177654	0.032928
379.227	6.61879	0.0184188				483.846	18.1387	0.00720074				416.439	47.7295	0.0655554					310.148	0.0195393			y9		3.59489	0.0397561	0.0736445
381.285	10.535	0.0293167				487.224	4733.04	1.87893				417.525	17.7507	0.0243802					312.819	0.0103903			y9		4.77189	0.0605111	nd
384.11	9.01755	0.025094				488.23	1044.08	0.414481				418.629	21.2872	0.0292375					312.959	0.00665744
385.002	9.59635	0.0267047				488.859	40.9372	0.0162513				424.107	11.3427	0.0155789					314.208	0.020353			fragment ion		K8,12,16 ac/pr/pr	K8,12,16 ac/ac/pr
386.176	8.13864	0.0226482				494.214	127.638	0.0506699				425.276	16.1398	0.0221677					314.276	0.0586242			y10		0.217921	0.0241888
387.359	12.0879	0.0336382				498.062	31.5002	0.012505				428.195	4.8204	0.00662071					314.951	0.0230014			y10		0.149666	0.0314502
388.994	7.98935	0.0222328				500.396	31.3351	0.0124395				429.166	29.9995	0.0412036					315.225	0.0164268			y10		0.241167	nd
390.238	8.78754	0.024454				503.272	42.4991	0.0168714				430.307	593.511	0.815175					318.447	0.00483339			y11		0.456698	0.0373457
392.434	4.88074	0.0135821				504.328	39.3825	0.0156341				431.374	30.1583	0.0414217					319.093	0.0115211			y11		0.399712	0.00572004
395.282	12.1875	0.0339153				508.379	39.0039	0.0154838				432.234	11.9657	0.0164347					319.179	0.0155427			y11		0.395414	0.00947529
397.395	56.4786	0.157169				512.191	87.9805	0.0349267				435.815	9.3995	0.01291					320.271	0.0138282			y12		0.793718	nd
398.197	118.028	0.328447				514.484	9.98783	0.00396499				441.134	22.199	0.0304899					322.307	0.0158277			y12		0.882546	nd
399.389	17.4871	0.0486631				517.477	18.509	0.00734773				445.869	3.85039	0.00528842					323.235	0.137766			y12		0.764291	nd
401.977	8.38213	0.0233258				526.295	867.956	0.344563				452.27	6.12203	0.00840848					323.284	0.0580434
403.051	4.40426	0.0122562				527.357	117.497	0.0466441				453.72	8.57388	0.011776					323.312	0.0173729
407.19	11.3425	0.0315639				530.266	435.46	0.17287				454.41	8.71552	0.0119706					324.435	0.00498967
410.221	12.9032	0.0359072				534.365	80.423	0.0319265				455.338	51.3735	0.0705604					325.139	0.0100132
412.059	18.2016	0.0506514				544.281	26477	10.5109				456.034	17.3545	0.023836					325.366	0.0274025
413.209	21.9916	0.0611983				545.37	3783.45	1.50196				459.668	5.5884	0.00767554					325.996	0.0167422
413.987	9.96138	0.0277205				547.617	12.9133	0.00512634				460.807	25.4411	0.0349428					326.853	0.0129162
415.104	162.634	0.452577				549.77	182.828	0.0725796				469.177	62.988	0.0865127					326.876	0.0248015
416.313	2.65476	0.00738766				550.436	646.686	0.256723				470.102	64.4012	0.0884536					328.055	0.0125533
417.404	7.4866	0.0208337				551.47	47.7771	0.0189667				470.851	5.41136	0.00743238					329.399	0.0148954
418.365	13.432	0.0373784				552.239	36.2672	0.0143974				473.372	45.478	0.062463					330.297	0.00302274
420.204	6.90642	0.0192192				554.775	171.473	0.0680717				474.407	21.6848	0.0297835					331.071	0.0191151
430.292	196.351	0.546406				563.213	129.272	0.0513186				480.171	37.9112	0.0520703					331.401	0.0417311
432.921	9.03695	0.025148				563.849	406.59	0.161409				483.043	13.713	0.0188346					334.859	0.0180563
434.207	11.5319	0.0320909				568.131	5813.58	2.30789				484.468	7.90617	0.010859					335.23	0.00475853
435.2	6.03047	0.0167816				569.108	1006.42	0.399531				485.525	8.50681	0.0116839					338.192	0.00771491
437.392	14.7835	0.0411396				570.1	115.168	0.0457195				487.267	1292.5	1.77522					338.332	0.0183128
438.143	1.92038	0.00534403				573.473	52.2219	0.0207312				488.363	211.98	0.29115					340.449	0.0578198
440.729	29.2108	0.0812878				574.383	123.892	0.0491831				489.221	21.6282	0.0297058					341.066	0.319451	b3
441.526	8.42735	0.0234516				575.498	165.285	0.0656151				493.464	13.6804	0.0187897					341.085	0.251397	b3
442.628	11.387	0.0316876				579.465	35.582	0.0141254				494.479	56.3185	0.0773522					341.16	0.629792	b3
446.078	7.56465	0.0210509				581.142	45.2005	0.0179438				497.822	22.8936	0.0314439					341.962	0.136603
447.131	7.63207	0.0212385				582.067	57.3111	0.0227515				498.434	8.29185	0.0113887					342.018	0.114718
451.508	6.74669	0.0187747				583.23	498.523	0.197905				500.351	14.8364	0.0203774					342.224	0.115299
452.216	29.2192	0.0813111				584.156	33.0782	0.0131315				501.114	29.211	0.0401206					342.593	0.0127273
453.047	8.62106	0.0239907				590.195	46.8546	0.0186005				503.463	11.0659	0.0151988					343.141	0.0452315
455.093	71.8567	0.199963				591.999	1827.04	0.725302				504.31	32.3388	0.0444167					343.201	0.0105272
460.138	10.6178	0.0295471				593.052	88.1063	0.0349766				507.695	37.8304	0.0519592					345.234	0.0595638	y2
461.696	2.29529	0.00638733				593.846	53.1228	0.0210888				509.226	46.0069	0.0631895					345.438	0.0350961	y2
462.865	13.3783	0.0372291				596.116	179.66	0.0713217				512.237	53.1497	0.073					346.29	0.0381724
468.248	4.47453	0.0124517				596.91	227.922	0.0904809				513.212	7.91929	0.010877					346.521	0.0584066
469.115	4.4357	0.0123437				600.154	83.5264	0.0331585				514.974	62.9315	0.086435					351.968	0.00947744
470.143	2.78157	0.00774056				600.8	34.7324	0.0137882				518.237	4.64501	0.00637982					352.189	0.0060579
473.045	17.5609	0.0488684				601.438	32.9157	0.0130669				523.526	9.56009	0.0131306					353.23	0.0142051
474.251	15.6283	0.0434904				602.326	68.106	0.0270369				526.132	217.324	0.29849					354.186	0.0305818
478.726	14.82	0.041241				603.164	30.1455	0.0119672				526.768	26.4081	0.036271					356.026	0.00522801
485.981	21.6057	0.0601244				607.274	278.045	0.110379				527.532	7.07298	0.00971459					358.042	0.00924781
487.215	523.573	1.457				608.213	47.0362	0.0186726				528.822	16.9928	0.0233393					359.193	1.41747	y2
488.29	10.121	0.0281646				611.3	456.283	0.181136				530.257	86.3955	0.118662					359.215	1.58784	y2
489.174	19.9	0.0553778				613.779	38.9423	0.0154594				531.357	25.6599	0.0352434					359.271	1.60051	y2
490.797	15.5182	0.0431841				620.338	5764.22	2.28829				538.05	52.7849	0.0724989					360.224	0.053432
494.439	18.8798	0.0525386				620.969	2022.28	0.802811				544.268	6424.98	8.82457					360.265	0.223929
497.939	2.68097	0.00746061				621.832	207.208	0.0822579				545.355	1203.91	1.65355					360.288	0.226805
500.192	3.82728	0.0106506				623.84	13.9257	0.00552824				546.458	16.0071	0.0219854					360.919	0.00666771
501.361	2.66561	0.00741785				625.229	7140.54	2.83467				550.278	167.155	0.229584					362.036	0.0521741
502.373	18.8158	0.0523606				626.294	1932.08	0.767002				551.142	40.709	0.055913					366.217	0.0436631
503.229	8.44238	0.0234934				628.69	28.5633	0.0113391				553.879	11.2785	0.0154908					366.956	0.0179531
508.248	8.40722	0.0233956				631.403	79.9953	0.0317567				554.927	27.2642	0.0374468					370.138	0.0375694
509.328	5.26367	0.0146477				637.087	9.68909	0.0038464				561.585	6.55527	0.00900352					370.431	0.0241113
510.217	7.78981	0.0216775				639.242	126.174	0.0500889				562.229	12.0192	0.0165081					375.498	0.110549
511.307	18.1348	0.0504657				640.6	53.9817	0.0214298				563.27	60.4555	0.0830344					376.287	0.107496
512.467	27.649	0.0769418				650.906	13.4817	0.00535201				563.997	125.93	0.172962					377.477	0.00884989
515.093	7.54821	0.0210052				651.939	52.1458	0.020701				566.569	11.7004	0.0160702					379.227	0.0184188
516.421	17.0029	0.0473156				654.944	10.6652	0.00423389				568.123	1526.33	2.09638					379.257	0.0253952
518.297	14.1487	0.039373				655.597	17.1602	0.0068123				569.309	226.052	0.310478					379.898	0.0226952
519.433	16.7014	0.0464768				657.379	129.102	0.0512514				571.145	13.6852	0.0187963					380.821	0.00900793
520.863	8.84103	0.0246028				658.386	10.7083	0.00425099				573.25	5.07749	0.00697382					381.285	0.0293167
522.269	9.41651	0.0262043				660.617	86.628	0.0343898				576.392	20.4853	0.028136					381.413	0.00683582
524.577	5.67418	0.0157901				662.093	99.1866	0.0393753				578.231	14.344	0.0197012					382.176	0.0146793
526.312	59.5402	0.165689				668.112	87.4082	0.0346995				579.596	45.8722	0.0630045					383.306	0.00566796
526.983	4.31677	0.0120127				669.118	38.7209	0.0153715				580.278	23.3697	0.0320977					384.071	0.0201827
527.694	13.9778	0.0388976				671.984	8.70746	0.00345671				581.96	40.9724	0.0562747					384.11	0.025094
528.486	21.6517	0.0602524				675.33	204.056	0.0810068				583.184	54.9393	0.0754579					385.002	0.0267047
529.703	4.55888	0.0126865				676.552	24.6801	0.00979758				584.215	46.655	0.0640796					386.176	0.0226482
530.368	10.428	0.029019				678.647	25.0367	0.00993914				584.911	13.4821	0.0185174					386.565	0.0119873
531.468	11.5671	0.0321889				679.466	61.802	0.0245343				586.819	8.35482	0.0114752					387.359	0.0336382
532.119	2.10888	0.00586861				680.529	60.879	0.0241679				590.258	18.9075	0.025969					388.994	0.0222328
537.119	6.56406	0.0182665				686.233	76.754	0.03047				591.885	397.203	0.54555					390.238	0.024454
537.922	11.3611	0.0316158				687.425	59.1734	0.0234908				592.75	53.7162	0.073778					392.434	0.0135821
539.204	12.4675	0.0346947				688.303	103.441	0.0410644				593.424	9.26919	0.012731					394.293	0.0309711
541.508	17.5344	0.0487947				689.201	52.4123	0.0208068				594.367	17.1758	0.0235905					395.282	0.0339153
542.265	3.14696	0.00875736				692.44	154.924	0.0615021				597.363	95.5005	0.131168					396.326	0.0241236
544.287	2984.05	8.304				696.475	516.993	0.205237				600.974	23.1971	0.0318608					397.165	0.102549
545.303	144.339	0.401667				699.35	268.074	0.10642				602.172	26.7245	0.0367055					397.395	0.157169
546.397	31.8193	0.0885467				700.132	47.5512	0.018877				603.288	47.1752	0.0647941					397.918	0.639188	b4
548.03	14.6863	0.040869				702.952	33.1425	0.013157				604.474	13.155	0.0180682					398.119	0.485103	b4
550.223	81.2888	0.226211				705.589	8504.66	3.3762				607.575	47.3501	0.0650343					398.197	0.328447	b4
551.774	7.45712	0.0207517				706.505	306.464	0.121661				608.643	9.326	0.0128091					398.933	0.062454
554.521	19.7061	0.0548381				707.424	274.477	0.108963				610.507	43.3444	0.0595325					399.086	0.0516936
558.051	30.3254	0.0843895				709.471	139.413	0.0553446				611.351	232.166	0.318875					399.389	0.0486631
559.937	20.8437	0.0580039				710.174	1479.16	0.587201				612.66	68.7551	0.0944336					400.394	0.0166003
563.365	88.7978	0.247106				711.158	460.492	0.182807				613.543	12.9553	0.0177938					401.052	0.0193539
564.423	10.1898	0.0283561				712.273	73.7649	0.0292834				617.341	9.42176	0.0129406					401.977	0.0233258
567.517	16.663	0.0463699				715.023	202.38	0.0803412				620.453	1805.67	2.48005					403.044	0.00842246
568.174	636.107	1.77016				715.843	128.529	0.0510236				621.418	53.6968	0.0737514					403.051	0.0122562
569.08	36.384	0.101249				717.28	39.4559	0.0156633				622.968	29.7882	0.0409135					405.257	0.0101916
569.872	40.3871	0.112389				718.263	9.52778	0.00378236				625.153	1895.08	2.60285					407.19	0.0315639
571.234	5.26354	0.0146474				719.423	143.75	0.0570662				626.259	583.359	0.801231					409.277	0.0179993
573.329	20.6794	0.0575467				720.326	813.737	0.323039				627.32	74.3391	0.102103					410.221	0.0359072
574.568	19.8636	0.0552764				721.549	55.0781	0.021865				628.284	13.1191	0.0180188					411.581	0.0207581	b4
579.33	22.8406	0.0635609				722.413	309.827	0.122996				632.147	50.0412	0.0687305					412.059	0.0506514	b4
580.196	9.33243	0.0259703				724.792	457.581	0.181651				634.355	54.1259	0.0743408					412.176	0.0883468	b4
580.809	8.23867	0.0229266				725.66	448.327	0.177978				636.061	9.16918	0.0125937					412.209	0.030798
582.169	14.2	0.0395158				726.756	122.912	0.0487938				637.302	24.5069	0.0336597					413.209	0.0611983
583.005	55.7927	0.15526				728.409	3472.28	1.37843				637.922	21.5357	0.0295788					413.987	0.0277205
584.169	5.65312	0.0157315				729.449	811.258	0.322055				639.261	227.374	0.312293					415.042	0.615592
586.201	13.5922	0.0378244				730.725	148.953	0.0591317				640.357	125.436	0.172283					415.104	0.452577
590.233	18.4963	0.0514715				731.83	285.288	0.113254				642.269	32.0522	0.044023					415.172	0.496969
591.205	18.8681	0.0525061				735.361	47.3376	0.0187922				644.282	6.01397	0.00826006					415.765	0.0672186
591.84	164.467	0.457679				736.472	141.991	0.0563679				645.295	42.5977	0.058507					416.214	0.0512714	y3
593.085	50.4145	0.140293				738.166	15198.1	6.03338				645.999	13.2542	0.0182044					416.313	0.00738766	y3
594.282	4.79536	0.0133445				739.119	5179.41	2.05613				649.527	25.4588	0.0349671					416.439	0.0655554	y3
595.343	31.4349	0.087477				740	181.92	0.0722188				651.053	9.14404	0.0125591					417.404	0.0208337
596.01	5.62229	0.0156457				741.617	56.073	0.02226				652.99	38.7814	0.0532654					417.525	0.0243802
597.156	21.066	0.0586223				742.649	293.19	0.116391				655.183	107.645	0.147849					418.365	0.0373784
597.794	6.8253	0.0189934				744.024	2584.58	1.02603				656.064	38.3402	0.0526594					418.629	0.0292375
598.887	27.3732	0.0761742				744.755	113.893	0.0452134				656.687	6.89683	0.00947265					420.204	0.0192192
600.19	6.85119	0.0190655				745.467	119.75	0.0475386				658.115	16.4106	0.0225395					424.107	0.0155789
601.443	11.5484	0.032137				748.851	29.7093	0.0117941				659.027	40.263	0.0553004					425.01	0.010151
602.309	10.5983	0.0294929				750.378	888.513	0.352724				660.088	71.1372	0.0977054					425.276	0.0221677
604.325	23.3661	0.0650232				751.43	37.7948	0.0150039				661.467	34.199	0.0469716					427.034	0.0252315
607.113	55.8177	0.15533				752.895	11861.4	4.70875				663.146	29.8506	0.0409992					428.195	0.00662071
608.031	31.0783	0.0864848				753.509	3138.51	1.24593				664.313	24.9417	0.0342568					429.166	0.0412036
609.367	19.5221	0.0543262				754.382	231.742	0.0919973				665.659	86.5991	0.118942					430.249	0.936818	y3
611.274	222.545	0.619297				755.98	138.897	0.0551396				666.351	22.739	0.0312315					430.292	0.546406	y3
611.935	4.85138	0.0135004				772.036	22.03	0.00874551				667.223	24.8266	0.0340988					430.307	0.815175	y3
613.579	24.585	0.068415				776.597	77.7632	0.0308706				668.182	20.7274	0.0284687					431.1	0.0812541
615.133	29.0681	0.0808908				777.44	292.219	0.116006				669.108	17.1422	0.0235445					431.374	0.0414217
616.593	41.1639	0.114551				778.663	77.9918	0.0309614				671.209	63.4167	0.0871014					432.234	0.0164347
618.334	5.73422	0.0159572				780.04	172.193	0.0683577				672.286	52.0994	0.0715574					432.921	0.025148
620.285	669.103	1.86198				781.084	216.138	0.0858028				673.724	32.9944	0.0453171					434.207	0.0320909
621.109	141.14	0.392764				785.404	19631	7.79317				674.51	38.9162	0.0534505					435.2	0.0167816
622.312	71.9851	0.20032				786.496	6204.47	2.46306				675.317	10.3122	0.0141636					435.815	0.01291
623.145	30.544	0.0849979				787.682	100.79	0.040012				676.278	28.2451	0.0387941					437.392	0.0411396
625.172	1042.25	2.90038				793.152	61.8997	0.0245731				679.905	63.1437	0.0867264					438.143	0.00534403
626.156	117.253	0.32629				795.136	3078.15	1.22197				680.665	47.935	0.0658377					440.729	0.0812878
627.055	17.1058	0.0476021				796.127	713.739	0.283342				681.723	34.3616	0.0471949					441.134	0.0304899
628.318	9.84569	0.0273986				802.477	20.0786	0.00797084				683.276	8.45507	0.0116129					441.526	0.0234516
629.226	4.16545	0.0115916				808.223	39.2028	0.0155628				685.826	195.105	0.267972					442.628	0.0316876
631.785	55.4046	0.15418				812.198	1869.8	0.742276				687.351	86.4862	0.118787					445.869	0.00528842
632.913	7.50759	0.0208921				813.125	222.35	0.088269				688.248	58.489	0.0803334					446.078	0.0210509
634.225	14.6984	0.0409027				813.735	172.467	0.0684665				689.397	17.2659	0.0237144					447.131	0.0212385
635.361	12.5927	0.0350429				814.739	85.7692	0.0340489				690.36	85.4028	0.117299					448.323	0.0271402
636.038	15.8516	0.0441118				824.618	41.3705	0.0164234				691.294	9.29416	0.0127653					451.508	0.0187747
637.088	23.1517	0.0644267				826.149	20.2267	0.00802964				692.272	59.7585	0.082077					452.216	0.0813111
638.377	7.61603	0.0211939				828.53	85.4808	0.0339344				693.253	38.6674	0.0531088					452.27	0.00840848
639.335	11.8476	0.0329695				830.965	59.7183	0.0237071				694.761	50.3258	0.0691214					453.047	0.0239907
641.766	19.7943	0.0550837				833.555	59.2801	0.0235331				696.221	155.812	0.214005					453.571	0.0276883
644.598	47.9167	0.133343				845.803	76.2662	0.0302763				697.186	165.831	0.227765					453.72	0.011776
645.539	11.7147	0.0325997				846.578	83.3459	0.0330868				698.114	55.0193	0.0755678					454.41	0.0119706
649.399	13.2957	0.0369992				848.337	46.0497	0.0182809				699.182	75.3967	0.103556					455.093	0.199963
650.401	20.7023	0.0576102				849.738	32.3857	0.0128566				700.062	83.4208	0.114577					455.252	0.120128
651.014	2.11909	0.00589699				863.56	68.4077	0.0271566				701.48	17.6987	0.0243088					455.338	0.0705604
652.803	38.6783	0.107634				864.262	45.7327	0.0181551				702.55	40.1933	0.0552047					456.034	0.023836
653.979	61.2044	0.17032				866.185	134.412	0.053359				703.438	68.615	0.0942411					456.324	0.101579
655.175	69.2396	0.19268				867.262	118.323	0.0469723				705.535	2468.55	3.3905					459.668	0.00767554
656.385	74.7815	0.208102				869.287	149.217	0.0592365				706.369	51.7995	0.0711455					460.138	0.0295471
658.296	27.3447	0.0760948				877.592	88.6926	0.0352094				707.254	33.5805	0.046122					460.807	0.0349428
659.162	2.10639	0.00586167				878.548	14.5993	0.00579568				709.589	102.329	0.140547					461.696	0.00638733
660.05	16.5175	0.0459648				880.831	149.432	0.059322				710.328	198.81	0.273061					462.865	0.0372291
661.701	30.8663	0.0858947				881.598	31.242	0.0124025				711.324	54.4675	0.0748099					468.248	0.0124517
663.245	9.43823	0.0262647				882.297	13.0369	0.00517542				712.904	29.6235	0.0406872					469.115	0.0123437
665.928	11.9832	0.0333469				885.302	33.2927	0.0132166				713.839	16.7297	0.0229779					469.177	0.0865127
667.754	19.8828	0.0553299				888.618	56.0846	0.0222646				714.452	27.763	0.0381318					469.317	0.135765
669.228	148.213	0.412448				894.489	61.82	0.0245415				715.588	84.9066	0.116617					470.102	0.0884536
670.062	48.4453	0.134814				896.717	41.2216	0.0163643				716.564	140.581	0.193086					470.143	0.00774056
672.514	28.7932	0.0801258				898.493	1843.45	0.731816				717.488	24.911	0.0342148					470.418	0.025411
674.152	57.574	0.160217				899.549	613.109	0.243393				718.957	101.573	0.139509					470.851	0.00743238
674.925	25.4385	0.0707902				903.568	53.4635	0.0212241				720.31	251.363	0.345242					473.045	0.0488684	y4
675.912	41.5893	0.115735				905.484	24.255	0.00962879				721.199	41.5743	0.0571014					473.201	0.0460098	y4
676.564	42.3411	0.117827				908.01	60.8067	0.0241392				722.885	57.1353	0.0784741					473.372	0.062463	y4
677.511	28.4135	0.0790692				920.504	184.062	0.0730694				724.437	206.441	0.283542					474.251	0.0434904
678.478	25.7448	0.0716425				921.513	147.275	0.0584657				725.372	230.398	0.316446					474.407	0.0297835
679.561	4.07083	0.0113283				922.932	148.283	0.0588658				726.46	122.272	0.167938					474.429	0.00798828
680.316	7.94904	0.0221206				923.729	233.737	0.0927895				728.436	893.426	1.2271					476.199	0.00978891
681.215	12.5863	0.0350251				924.515	95.7558	0.0380134				729.475	329.189	0.452133					477.295	0.00775153
682.258	44.9243	0.125015				928.608	23.7494	0.00942808				730.739	98.5552	0.135363					478.726	0.041241
683.823	34.0511	0.0947575				931.566	124.73	0.0495155				731.486	51.0206	0.0700757					480.171	0.0520703
684.549	29.2868	0.0814993				937.431	576.792	0.228976				732.41	55.3269	0.0759902					481.362	0.0238078
686.582	26.39	0.0734381				938.459	342.119	0.135815				733.342	68.5378	0.0941352					483.043	0.0188346
687.247	71.9295	0.200165				941.523	44.7511	0.0177654				735.079	120.646	0.165705					483.846	0.00720074
688.234	88.1098	0.245192				943.684	12.8833	0.00511446				736.527	159.889	0.219604					484.468	0.010859
689.483	33.1835	0.0923432				949.004	166.772	0.0662056				738.208	4298.2	5.90348					485.525	0.0116839
690.157	13.7338	0.0382183				951.405	42.4613	0.0168564				739.155	891.307	1.22419					485.981	0.0601244
690.889	8.87936	0.0247095				955.484	12020.4	4.77189				740.108	54.0999	0.074305					487.215	1.457	y4
691.606	34.0302	0.0946992				956.474	4038.18	1.60309				740.878	60.3919	0.0829469					487.224	1.87893	y4
692.596	24.4054	0.0679152				957.29	45.1782	0.0179349				741.496	5.87378	0.0080675					487.267	1.77522	y4
693.605	85.007	0.236557				961.454	1147.23	0.455431				743.476	573.316	0.787436					488.23	0.414481
694.579	4.21673	0.0117343				962.368	211.388	0.0839175				744.285	472.47	0.648927					488.29	0.0281646
695.376	12.3297	0.034311				967.491	132.868	0.0527461				745.174	143.323	0.196851					488.363	0.29115
696.386	135.1	0.375956				979.204	14346.1	5.69515				746.16	66.9924	0.0920125					488.859	0.0162513
697.698	24.6481	0.0685906				980.341	4468.59	1.77395				747.135	120.631	0.165684					489.174	0.0553778
698.573	8.97607	0.0249786				981.458	40.6669	0.0161441				747.859	10.6411	0.0146154					489.221	0.0297058
699.246	8.44987	0.0235143				985.835	130.079	0.0516392				748.673	107.96	0.148281					490.797	0.0431841
700.161	7.03472	0.0195762				993.3	282.485	0.112142				749.699	150.184	0.206275					493.464	0.0187897
700.763	47.408	0.131927				993.984	78.6751	0.0312326				750.34	192.063	0.263794					494.214	0.0506699
702.431	63.0213	0.175376				1002.64	48.3877	0.0192091				751.015	18.9187	0.0259845					494.439	0.0525386
703.435	24.4392	0.0680094				1009.4	70.4633	0.0279727				752.285	271.698	0.373172					494.479	0.0773522
704.667	45.2805	0.126007				1018.46	622.972	0.247309				752.894	2832.39	3.89023					497.822	0.0314439
705.398	805.575	2.24175				1019.57	308.285	0.122384				753.557	890.875	1.2236					497.939	0.00746061
706.699	60.7054	0.168931				1025.32	81.4938	0.0323516				754.645	35.7384	0.0490859					498.062	0.012505
707.596	15.7024	0.0436967				1031.36	21.2585	0.00843924				755.487	7.42104	0.0101926					498.434	0.0113887
708.42	18.6529	0.0519072				1036.3	2719.74	1.07969				756.445	16.9346	0.0232594					500.192	0.0106506
709.596	71.1035	0.197867				1037.3	1112.21	0.44153				759.993	7.72932	0.010616					500.351	0.0203774
710.293	186.504	0.519003				1038.33	47.9132	0.0190207				762.984	17.0546	0.0234241					500.396	0.0124395
711.458	52.3915	0.145795				1042.06	74.8311	0.0297066				773.964	12.2159	0.0167783					501.114	0.0401206
712.498	45.7797	0.127396				1047.51	94.257	0.0374184				775.512	20.7882	0.0285521					501.361	0.00741785
713.541	31.7377	0.0883197				1048.93	91.9895	0.0365182				777.343	26.5536	0.0364708					502.373	0.0523606
715.428	134.434	0.374102				1050.33	64.6648	0.0256708				778.276	31.2307	0.0428947					503.229	0.0234934
716.656	97.1286	0.270289				1065.26	226.355	0.0898591				778.918	6.1062	0.00838674					503.272	0.0168714
717.839	130.1	0.362042				1066.43	46.7921	0.0185756				780.59	16.2662	0.0223412					503.463	0.0151988
718.896	74.4738	0.207246				1071.28	100.404	0.0398586				785.38	4870.74	6.68985					504.31	0.0444167
719.999	96.9502	0.269793				1075.25	205.234	0.0814743				786.488	1463.93	2.01067					504.328	0.0156341
720.889	21.6798	0.0603305				1076.64	120.152	0.0476982				787.332	16.9325	0.0232565					507.695	0.0519592
722.453	31.4442	0.0875029				1093.28	1597.03	0.633993				791.979	10.4555	0.0143605					508.248	0.0233956
723.358	67.6344	0.188213				1094.29	597.538	0.237212				794.638	125.19	0.171945					508.379	0.0154838
724.152	122.728	0.341529				1106.45	22.5804	0.008964				795.314	488.09	0.670381					509.226	0.0631895
724.902	371.26	1.03314				1107.21	36.3539	0.0144319				796.262	183.721	0.252336					509.328	0.0146477
725.652	129.966	0.36167				1108.72	30.537	0.0121226				797.28	5.67427	0.00779349					510.217	0.0216775
726.272	35.739	0.0994545				1111.33	79.2231	0.0314502				798.144	49.7223	0.0682924					511.307	0.0504657
726.982	27.4505	0.0763891				1118.67	10.2561	0.0040715				799.753	10.7761	0.0148008					512.191	0.0349267
728.32	494.04	1.37481				1124.28	63.7423	0.0253046				800.464	12.0475	0.016547					512.237	0.073
729.273	48.1995	0.13413				1125.56	548.944	0.217921				801.383	15.4468	0.0212159					512.467	0.0769418
730.07	86.9525	0.241971				1126.49	284.831	0.113073				802.206	15.2939	0.0210059					513.212	0.010877
731.348	90.2331	0.251101				1127.36	32.7345	0.012995				803.351	7.09745	0.00974819					514.484	0.00396499
732.409	78.676	0.21894				1129.56	40.8914	0.0162332				804.336	25.6953	0.035292					514.974	0.086435
733.712	143.884	0.4004				1136.44	118.18	0.0469155				809.044	39.4001	0.0541152					515.093	0.0210052
734.433	82.8733	0.23062				1146.63	315.203	0.12513				810.114	15.5187	0.0213146					516.421	0.0473156
735.278	74.9336	0.208525				1147.46	174.459	0.0692573				811.541	64.1247	0.0880738					517.477	0.00734773
736.801	173.207	0.482001				1159.83	35.011	0.0138988				812.303	392.807	0.539512					518.237	0.00637982
738.163	1963.75	5.46474				1164.23	2770.42	1.09981				813.205	120.637	0.165692					518.297	0.039373
739.236	235.888	0.656428				1165.23	2494	0.990074				817.812	30.4308	0.041796					519.433	0.0464768
740.663	89.3396	0.248614				1168.32	94.074	0.0373457				820.536	6.49582	0.00892186					520.863	0.0246028
741.474	80.6278	0.224371				1178.43	96.0405	0.0381264				823.536	4.80661	0.00660177					522.269	0.0262043
743.089	349.434	0.972404				1181.18	323.467	0.128411				826.282	22.4904	0.0308901					523.526	0.0131306
744.142	423.497	1.17851				1182.54	1150.42	0.456698				827.013	11.3969	0.0156534					524.577	0.0157901
745.423	22.8403	0.0635601				1183.68	636.06	0.252505				828.603	35.2226	0.0483775					526.132	0.29849
746.541	100.918	0.280834				1184.61	74.8783	0.0297253				833.978	42.0616	0.0577706					526.295	0.344563
747.798	49.7422	0.138423				1221.5	241.135	0.0957262				839.659	12.1782	0.0167265					526.312	0.165689
748.72	57.6925	0.160547				1222.29	163.536	0.064921				842.004	10.4903	0.0144083					526.768	0.036271
749.393	123.582	0.343903				1223.07	158.404	0.0628838				845.659	16.7379	0.0229891					526.983	0.0120127
750.22	187.001	0.520388				1239.63	1999.38	0.793718				846.59	23.5056	0.0322844					527.357	0.0466441
752.054	400.485	1.11447				1240.45	770.455	0.305857				849.093	79.9178	0.109765					527.532	0.00971459
752.935	980.74	2.7292				1253.13	32.07	0.0127312				850.45	13.3938	0.0183961					527.694	0.0388976
753.767	116.534	0.32429				1255.24	59.2774	0.0235321				852.554	12.0266	0.0165182					528.486	0.0602524
754.694	7.75043	0.0215679				1273.55	45.7747	0.0181718				854.114	85.746	0.11777					528.822	0.0233393
755.418	2.88569	0.0080303				1276.52	69.7822	0.0277023				855.318	91.5762	0.125778					529.703	0.0126865
760.462	4.6374	0.012905				1327.42	54.6409	0.0216915				856.431	17.9938	0.0247141					530.257	0.118662	y5
767.052	9.72359	0.0270588				1328.59	333.542	0.13241				857.073	25.0253	0.0343717					530.266	0.17287	y5
768.69	6.96212	0.0193742				1330.12	518.63	0.205887				858.242	9.51865	0.0130737					530.368	0.029019	y5
774.187	5.56405	0.0154836				1331.45	308.762	0.122573				863.027	57.4745	0.0789399					531.357	0.0352434
776.841	38.5504	0.107278				1332.41	28.2922	0.0112315				864.083	35.4789	0.0487295					531.468	0.0321889
778.04	72.9069	0.202885				1348.36	5218.46	2.07163				866.786	29.4431	0.0404395					532.119	0.00586861
779.202	20.601	0.0573286				1349.49	2127.2	0.844461				867.518	15.736	0.0216131					534.365	0.0319265
781.536	14.9975	0.0417349				1367.46	56.8792	0.0225801				868.459	64.8033	0.0890059					537.119	0.0182665
784.165	5.29751	0.0147419										874.754	96.4716	0.132502					537.922	0.0316158
785.39	2343.58	6.52171										876.576	16.3982	0.0225226					538.05	0.0724989
786.654	146.811	0.408545										877.654	13.6429	0.0187383					539.204	0.0346947
789.186	3.39338	0.0094431										881.964	36.3823	0.0499703					541.508	0.0487947
790.004	60.8099	0.169222										884.48	19.6039	0.0269255					542.265	0.00875736
792.246	25.9617	0.0722462										885.218	54.9255	0.0754389					544.268	8.82457	y5
794.486	112.665	0.313524										893.802	57.7752	0.079353					544.281	10.5109	y5
795.388	355.183	0.988403										897.323	14.967	0.0205569					544.287	8.304	y5
796.255	12.9043	0.0359102										898.488	593.196	0.814741					545.303	0.401667
797.32	26.0347	0.0724493										899.679	191.626	0.263195					545.355	1.65355
798.22	25.495	0.0709476										902.332	32.1619	0.0441736					545.37	1.50196
802.728	14.3402	0.039906										903.919	36.7769	0.0505123					546.397	0.0885467
808.397	2.22483	0.00619124										905.507	29.0081	0.039842					546.458	0.0219854
810.487	24.1815	0.0672922										909.147	4.38759	0.00602626					547.617	0.00512634
811.99	219.87	0.611854										912.446	38.4547	0.0528167					548.03	0.040869
812.927	42.2882	0.11768										915.037	9.15202	0.0125701					549.77	0.0725796
813.734	14.2918	0.0397713										920.037	90.7078	0.124585					550.223	0.226211
814.882	5.10218	0.0141983										921.401	137.12	0.188331					550.278	0.229584
815.736	5.48581	0.0152659										922.071	20.0544	0.0275443					550.436	0.256723
816.675	69.3476	0.192981										924.474	12.8295	0.017621					551.142	0.055913
817.419	27.686	0.0770445										928.057	53.619	0.0736445					551.47	0.0189667
819.296	5.77618	0.016074										932.021	55.2611	0.0758999					551.774	0.0207517
821.715	4.73912	0.013188										933.422	68.0093	0.0934093					552.239	0.0143974
825.111	27.0191	0.0751888										934.445	41.5388	0.0570527					553.879	0.0154908
826.43	31.097	0.0865367										937.54	172.922	0.237505					554.521	0.0548381
827.191	24.1447	0.0671899										938.354	10.5612	0.0145056					554.775	0.0680717
828.548	22.1399	0.0616108										939.486	29.6678	0.040748					554.927	0.0374468
830.734	20.0017	0.0556609										940.976	56.7776	0.0779827					558.051	0.0843895
835.76	24.2289	0.0674243										942.063	44.0568	0.0605111					559.937	0.0580039
837.073	10.0045	0.0278404										942.696	19.5045	0.026789					561.585	0.00900352
838.467	5.95012	0.016558										947.367	4.28084	0.00587964					562.229	0.0165081
839.773	70.1509	0.195216										947.988	8.77953	0.0120585					563.213	0.0513186
840.475	24.1857	0.067304										948.604	14.14	0.019421					563.27	0.0830344
841.349	16.925	0.0470989										955.475	2943.34	4.04262					563.365	0.247106
842.278	34.7684	0.0967535										956.5	880.465	1.2093					563.849	0.161409
842.955	66.0903	0.183916										957.416	43.722	0.0600511					563.997	0.172962
844.446	54.5252	0.151733										958.469	7.19525	0.00988251					564.423	0.0283561
847.239	66.4543	0.184929										961.472	353.657	0.485741					566.569	0.0160702
848.305	18.4318	0.0512921										962.374	57.0783	0.0783958					567.517	0.0463699
850.063	22.7101	0.0631977										968.106	15.9689	0.0219329					568.123	2.09638	b5
851.042	9.82541	0.0273422										969.248	16.3942	0.0225171					568.131	2.30789	b5
851.714	20.4244	0.056837										976.39	34.3681	0.0472039					568.174	1.77016	b5
852.559	14.616	0.0406733										979.221	3547.66	4.87264					569.08	0.101249
855.509	49.437	0.137573										980.296	1269.69	1.74389					569.108	0.399531
856.428	6.54	0.0181995										981.467	38.2882	0.052588					569.309	0.310478
857.27	12.8489	0.035756										982.288	3.51122	0.00482259					569.872	0.112389
858.368	15.727	0.043765										983.631	6.34912	0.00872038					570.1	0.0457195
862.218	9.44923	0.0262953										984.762	4.16058	0.00571447					571.145	0.0187963
863.518	23.644	0.0657964										985.954	5.81332	0.00798447					571.234	0.0146474
864.576	15.4608	0.0430244										989.36	14.1393	0.0194201					573.25	0.00697382
865.728	31.0183	0.0863177										990.773	11.3481	0.0155864					573.329	0.0575467
866.488	36.6228	0.101914										993.258	140.494	0.192965					573.473	0.0207312
867.303	4.75661	0.0132367										994.227	36.4126	0.0500119					574.383	0.0491831
869.005	23.0086	0.0640284										995.375	14.4477	0.0198436					574.568	0.0552764
870.83	4.52338	0.0125877										999.196	17.1638	0.0235741					575.498	0.0656151
873.541	11.4453	0.0318499										1005.33	12.1454	0.0166814					576.392	0.028136
874.631	3.28547	0.0091428										1006.69	25.4928	0.0350138					578.231	0.0197012
876.21	5.37934	0.0149696										1008.56	31.3603	0.0430726					579.33	0.0635609
880.345	9.47965	0.02638										1009.34	8.86859	0.0121808					579.465	0.0141254
881.186	7.19667	0.0200269										1012.38	27.6804	0.0380184					579.596	0.0630045
882.481	36.0802	0.100404										1013.2	20.2287	0.0277836					580.196	0.0259703
883.789	49.5472	0.13788										1014.38	10.55	0.0144902					580.278	0.0320977
886.342	27.4987	0.0765234										1018.4	90.3116	0.124041					580.809	0.0229266
888.872	10.7351	0.0298737										1019.52	45.8798	0.0630149					581.142	0.0179438
890.587	22.5471	0.0627442										1020.53	9.04825	0.0124276					581.96	0.0562747	b5
891.31	8.3772	0.0233121										1027.39	37.9458	0.0521177					582.067	0.0227515	b5
895.326	9.42638	0.0262317										1030.31	45.4708	0.0624532					582.169	0.0395158	b5
896.327	2.73071	0.00759902										1031.9	2.87666	0.00395104					583.005	0.15526
897.3	12.0949	0.0336577										1032.76	14.298	0.019638					583.184	0.0754579
898.45	243.35	0.677195										1036.24	738.325	1.01407					583.23	0.197905
899.237	8.46083	0.0235448										1037.21	251.81	0.345856					584.156	0.0131315
899.873	12.2576	0.0341104										1038.63	12.8442	0.0176413					584.169	0.0157315
903.108	4.8316	0.0134454										1039.27	7.21183	0.00990529					584.215	0.0640796
905.064	18.9465	0.0527244										1040.33	8.22698	0.0112996					584.911	0.0185174
906.529	7.55852	0.0210339										1040.96	19.9632	0.0274191					586.201	0.0378244
908.429	8.97389	0.0249725										1041.65	88.5814	0.121665					586.819	0.0114752
909.736	28.2535	0.0786239										1050.13	77.9043	0.107					590.195	0.0186005
913.191	2.31739	0.00644885										1051.72	7.12861	0.00979099					590.233	0.0514715
914.371	3.44778	0.00959449										1052.46	46.8601	0.0643613					590.258	0.025969
918.008	2.17233	0.00604516										1053.35	42.7617	0.0587323					591.205	0.0525061
920.568	40.6417	0.113098										1054.51	31.0999	0.042715					591.84	0.457679
922.115	2.38003	0.00662315										1065.48	58.3568	0.0801518					591.885	0.54555
922.739	7.26231	0.0202095										1066.35	21.983	0.0301932					591.999	0.725302
927.377	11.8327	0.032928										1067.37	24.2527	0.0333105					592.75	0.073778
928.297	19.5092	0.0542903										1068.4	19.736	0.0271069					593.052	0.0349766
929.277	25.1865	0.0700891										1069.33	14.2804	0.0196138					593.085	0.140293
933.399	31.5114	0.0876899										1070.64	14.0257	0.019264					593.424	0.012731
935.148	8.71136	0.024242										1071.24	13.7876	0.0189369					593.846	0.0210888
936.263	8.21336	0.0228561										1072.71	24.4385	0.0335658					594.282	0.0133445
937.425	118.721	0.330376										1075.36	33.4248	0.0459083					594.367	0.0235905
938.599	11.7881	0.0328039										1076.35	5.66228	0.00777701					595.343	0.087477
939.246	6.29666	0.0175223										1077	9.85991	0.0135424					596.01	0.0156457	b5
941.742	14.2864	0.0397561										1085.58	17.0565	0.0234267					596.116	0.0713217	b5
943.923	23.1458	0.0644101										1087.3	18.6476	0.0256121					596.91	0.0904809
945.438	3.29681	0.00917438										1093.26	521.598	0.716403					597.156	0.0586223
946.39	20.0736	0.0558608										1094.26	124.07	0.170408					597.363	0.131168
948.529	87.6533	0.243922										1095.38	9.61529	0.0132064					597.794	0.0189934
950.311	19.5575	0.0544247										1096.2	23.2554	0.0319408					598.887	0.0761742
952.43	19.9171	0.0554253										1097.41	22.6189	0.0310665					600.154	0.0331585
953.577	15.058	0.0419033										1106.47	19.483	0.0267595					600.19	0.0190655
955.479	1291.82	3.59489										1107.37	27.2706	0.0374556					600.8	0.0137882
956.44	132.841	0.369671										1108.64	5.31176	0.00729559					600.974	0.0318608
957.426	22.2221	0.0618396										1111.31	17.6114	0.0241888					601.438	0.0130669
958.467	23.4273	0.0651936										1111.98	7.76548	0.0106657					601.443	0.032137
961.433	107.289	0.298565										1113.48	11.6202	0.0159601					602.172	0.0367055
963.386	22.2959	0.0620451										1118.08	10.9638	0.0150586					602.309	0.0294929
965.794	22.1052	0.0615143										1125.59	108.969	0.149666					602.326	0.0270369
970.73	25.4781	0.0709005										1126.6	46.3612	0.063676					603.164	0.0119672
971.411	10.1152	0.0281485										1128.05	23.3707	0.0320991					603.288	0.0647941
972.748	5.99029	0.0166698										1128.71	7.01861	0.00963991					604.325	0.0650232
975.439	8.19618	0.0228083										1129.92	12.6337	0.0173521					604.474	0.0180682
976.626	7.3655	0.0204967										1131.37	7.89713	0.0108465					607.113	0.15533
977.701	11.5852	0.0322392										1136.4	43.4057	0.0596168					607.274	0.110379
979.193	1927.88	5.36492										1145.29	9.16801	0.0125921					607.575	0.0650343
980.23	134.107	0.373192										1146.48	166.791	0.229084					608.031	0.0864848
981.308	18.7226	0.0521012										1147.4	88.4107	0.12143					608.213	0.0186726
982.159	11.3235	0.031511										1148.68	7.17608	0.00985619					608.643	0.0128091
984.169	19.2041	0.0534411										1153.08	11.2777	0.0154897					609.367	0.0543262
985.714	6.93435	0.0192969										1153.72	11.7102	0.0160838					610.507	0.0595325
986.883	51.9414	0.144542										1164.3	973.519	1.33711					611.274	0.619297
987.658	2.62525	0.00730554										1165.23	426.079	0.58521					611.3	0.181136
990.169	23.0767	0.0642178										1166.12	17.8164	0.0244704					611.351	0.318875
996.9	8.54436	0.0237773										1169.07	6.89876	0.00947529					611.935	0.0135004
997.672	20.7325	0.0576944										1173.2	15.7835	0.0216783					612.66	0.0944336
998.561	9.88144	0.0274981										1177.77	26.2179	0.0360098					613.543	0.0177938
999.197	25.6154	0.0712825										1181.18	118.57	0.162854					613.579	0.068415
1001.24	9.36595	0.0260636										1182.61	291.022	0.399712					613.779	0.0154594
1003.11	26.8902	0.0748301										1183.36	42.4768	0.0583409					615.133	0.0808908
1006.44	16.9901	0.0472802										1184.03	62.9533	0.086465					616.593	0.114551
1007.9	15.2771	0.0425132										1185.91	4.20468	0.00577504					617.341	0.0129406
1010.68	12.9462	0.0360268										1201.94	10.9323	0.0150152					618.334	0.0159572
1014.26	10.2954	0.0286502										1202.87	4.19994	0.00576853					620.285	1.86198
1015.28	20.0974	0.055927										1203.61	5.11458	0.00702477					620.338	2.28829
1016.66	17.6503	0.0491173										1204.75	13.7786	0.0189247					620.453	2.48005
1017.73	37.6001	0.104633										1216.85	18.0345	0.0247699					620.969	0.802811
1018.62	54.5269	0.151737										1221.55	83.4101	0.114562					621.109	0.392764
1019.34	20.451	0.056911										1234.95	43.6687	0.0599779					621.418	0.0737514
1027.51	4.75291	0.0132264										1236.72	11.3769	0.015626					621.832	0.0822579
1032.53	12.7184	0.0353928										1237.47	7.99276	0.0109779					622.312	0.20032
1036.13	387.782	1.07912										1239.04	63.974	0.0878669					622.968	0.0409135
1036.91	27.5466	0.0766567										1239.68	642.563	0.882546					623.145	0.0849979
1037.55	29.8061	0.0829443										1240.74	153.958	0.211458					623.84	0.00552824
1038.78	7.80881	0.0217304										1244.78	20.3241	0.0279147					625.153	2.60285	b6
1039.44	14.9278	0.0415412										1256.9	11.141	0.015302					625.172	2.90038	b6
1041.13	10.0937	0.0280888										1258.23	23.3612	0.0320861					625.229	2.83467	b6
1044.46	87.8945	0.244593										1261.34	3.57204	0.00490612					626.156	0.32629
1046.2	18.6316	0.0518479										1263.23	10.4277	0.0143222					626.259	0.801231
1047.77	33.1447	0.0922352										1271.56	19.7063	0.0270661					626.294	0.767002
1051.16	29.2032	0.0812666										1273.24	10.0598	0.0138169					627.055	0.0476021
1052.87	40.1947	0.111854										1274.45	15.5035	0.0212937					627.32	0.102103
1054.72	9.17732	0.0255386										1310.76	27.9703	0.0384167					628.284	0.0180188
1057.14	5.86993	0.0163349										1312.43	5.01273	0.00688487					628.318	0.0273986
1058.3	12.8828	0.0358504										1314.6	34.0261	0.0467341					628.69	0.0113391
1060.34	14.5267	0.040425										1318.4	17.9688	0.0246797					629.226	0.0115916
1062.9	20.3846	0.0567263										1319.89	12.3438	0.0169539					631.403	0.0317567
1064.22	40.6698	0.113176										1326.61	11.6082	0.0159437					631.785	0.15418
1065.42	38.0847	0.105982										1327.75	65.9491	0.0905796					632.147	0.0687305
1068.4	11.9941	0.0333771										1328.55	54.4041	0.0747228					632.913	0.0208921
1069.55	5.47766	0.0152432										1329.3	30.3985	0.0417516					634.225	0.0409027
1072.51	21.55	0.0599693										1330.39	154.014	0.211535					634.355	0.0743408
1075.42	23.3219	0.0649002										1331.52	185.734	0.255102					635.361	0.0350429
1080.69	8.53824	0.0237602										1332.33	38.3847	0.0527205					636.038	0.0441118
1084.25	10.261	0.0285543										1344.28	15.1372	0.0207906					636.061	0.0125937
1088.39	3.866	0.0107583										1345.13	6.46285	0.00887658					637.087	0.0038464
1089.42	5.05062	0.0140549										1348.32	1326.78	1.8223					637.088	0.0644267
1091.5	16.0719	0.0447248										1349.47	770.584	1.05838					637.302	0.0336597
1093.37	192.538	0.535794										1350.34	17.6941	0.0243025					637.922	0.0295788
1094.61	6.26443	0.0174327										1365	11.3837	0.0156353					638.377	0.0211939
1104.89	26.5353	0.0738425										1366.62	11.8941	0.0163363					639.242	0.0500889	b6
1105.84	18.6173	0.0518083										1383.04	17.8772	0.024554					639.261	0.312293	b6
1107.64	15.2677	0.0424871										1523.67	19.8775	0.0273013					639.335	0.0329695	b6
1109.69	40.0439	0.111434										1617.65	5.45017	0.00748569					640.357	0.172283
1119.43	9.43558	0.0262573																	640.6	0.0214298
1121.66	12.3123	0.0342627																	641.766	0.0550837
1125.73	86.6633	0.241167																	642.269	0.044023
1126.89	5.44481	0.0151518																	644.282	0.00826006
1128.65	5.30449	0.0147613																	644.598	0.133343
1131.54	18.1398	0.0504796																	645.295	0.058507
1134.08	7.17149	0.0199568																	645.539	0.0325997
1136.24	9.54541	0.026563																	645.999	0.0182044
1137.25	5.97755	0.0166343																	649.399	0.0369992
1138.5	2.82301	0.00785587																	649.527	0.0349671
1141.5	6.60303	0.0183749																	650.401	0.0576102
1146.44	66.0304	0.183749																	650.906	0.00535201
1147.26	10.3932	0.0289223																	651.014	0.00589699
1148.95	5.43691	0.0151298																	651.053	0.0125591
1153.64	22.3735	0.0622609																	651.939	0.020701
1160.45	36.4047	0.101307																	652.803	0.107634
1161.49	9.37534	0.0260897																	652.99	0.0532654	b6
1162.56	4.72004	0.0131349																	653.979	0.17032	b6
1163.45	27.2354	0.0757906																	654.944	0.00423389
1164.16	479.559	1.33452																	655.175	0.19268
1165.38	33.4207	0.0930032																	655.183	0.147849
1166.26	6.90195	0.0192068																	655.597	0.0068123
1168.52	2.0555	0.00572004																	656.064	0.0526594
1172.24	14.6995	0.0409058																	656.385	0.208102
1174.38	5.09765	0.0141857																	656.687	0.00947265
1178.84	34.3017	0.0954547																	657.379	0.0512514
1181.45	55.6757	0.154934																	658.115	0.0225395
1182.66	142.092	0.395414																	658.296	0.0760948
1183.69	8.88623	0.0247286																	658.386	0.00425099
1184.52	22.9911	0.0639796																	659.027	0.0553004
1193.33	8.78626	0.0244504																	659.162	0.00586167
1195.65	20.0315	0.0557436																	660.05	0.0459648
1206.58	22.2454	0.0619046																	660.088	0.0977054
1209.1	20.3764	0.0567035																	660.617	0.0343898
1210.56	11.0196	0.0306654																	661.467	0.0469716
1215.45	1.41903	0.00394888																	661.701	0.0858947
1217.48	2.18517	0.0060809																	662.093	0.0393753
1218.41	3.71989	0.0103517																	663.146	0.0409992
1221.4	39.6744	0.110406																	663.245	0.0262647
1222.66	18.4023	0.0512099																	664.313	0.0342568
1235.68	14.0739	0.0391648																	665.659	0.118942
1236.6	11.7427	0.0326777																	665.928	0.0333469
1239.69	274.648	0.764291																	666.351	0.0312315
1240.68	46.1626	0.128461																	667.223	0.0340988
1245.55	3.99281	0.0111112																	667.754	0.0553299
1253.65	7.39635	0.0205826																	668.112	0.0346995
1255.24	7.77093	0.0216249																	668.182	0.0284687
1257.43	7.38172	0.0205419																	669.108	0.0235445
1262.23	13.4733	0.0374936																	669.118	0.0153715
1263.43	11.1079	0.0309111																	669.228	0.412448
1270.57	5.65523	0.0157374																	670.062	0.134814
1271.86	7.52382	0.0209373																	671.209	0.0871014
1274.57	3.37683	0.00939704																	671.984	0.00345671
1275.28	5.98688	0.0166603																	672.286	0.0715574
1281.31	6.3258	0.0176034																	672.514	0.0801258
1282.2	3.66488	0.0101986																	673.724	0.0453171
1282.94	10.6645	0.0296773																	674.152	0.160217
1290.49	12.6361	0.0351636																	674.51	0.0534505
1291.41	2.48529	0.00691608																	674.925	0.0707902
1292.11	9.55011	0.026576																	675.317	0.0141636
1305.97	34.5037	0.0960169																	675.33	0.0810068
1306.84	4.77201	0.0132796																	675.912	0.115735
1311.8	11.6438	0.0324023																	676.278	0.0387941
1314.43	4.22205	0.0117491																	676.552	0.00979758
1317.59	9.52919	0.0265178																	676.564	0.117827
1319.81	7.38573	0.020553																	677.511	0.0790692
1327.47	55.1058	0.153348																	678.478	0.0716425
1328.53	47.4557	0.13206																	678.647	0.00993914
1329.44	16.7128	0.0465084																	679.466	0.0245343
1330.52	146.43	0.407485																	679.561	0.0113283
1331.62	26.0497	0.0724912																	679.905	0.0867264
1337.58	21.9805	0.0611673																	680.316	0.0221206
1338.72	12.6579	0.0352244																	680.529	0.0241679
1346.05	16.3029	0.0453678																	680.665	0.0658377
1348.3	825.129	2.29617																	681.215	0.0350251
1349.35	85.2076	0.237116																	681.723	0.0471949
1350.03	6.1104	0.017004																	682.258	0.125015
1356.14	3.26144	0.00907594																	683.276	0.0116129
1362.89	13.6832	0.0380776																	683.823	0.0947575
1366.58	1.49692	0.00416562																	684.549	0.0814993
1374.91	7.29411	0.020298																	685.826	0.267972
1376.97	12.4697	0.0347008																	686.233	0.03047
1385.76	5.2423	0.0145883																	686.582	0.0734381
1387.08	10.1821	0.0283348																	687.247	0.200165
1467.72	13.4674	0.0374772																	687.351	0.118787
1574.71	5.5429	0.0154248																	687.425	0.0234908
1594.63	2.92445	0.00813816																	688.234	0.245192
1712.34	1.56083	0.00434348																	688.248	0.0803334
1734.47	6.93909	0.0193101																	688.303	0.0410644
1877.11	1.32368	0.00368353																	689.201	0.0208068
1937.9	2.87265	0.00799401																	689.397	0.0237144
1972.26	2.54115	0.00707151																	689.483	0.0923432
																			690.157	0.0382183
																			690.36	0.117299
																			690.889	0.0247095
																			691.294	0.0127653
																			691.606	0.0946992
																			692.272	0.082077
																			692.44	0.0615021
																			692.596	0.0679152
																			693.253	0.0531088
																			693.605	0.236557
																			694.579	0.0117343
																			694.761	0.0691214
																			695.376	0.034311
																			696.221	0.214005
																			696.386	0.375956
																			696.475	0.205237
																			697.186	0.227765
																			697.698	0.0685906
																			698.114	0.0755678
																			698.573	0.0249786
																			699.182	0.103556
																			699.246	0.0235143
																			699.35	0.10642
																			700.062	0.114577	y6
																			700.132	0.018877	y6
																			700.161	0.0195762	y6
																			700.763	0.131927
																			701.48	0.0243088
																			702.431	0.175376
																			702.55	0.0552047
																			702.952	0.013157
																			703.435	0.0680094
																			703.438	0.0942411
																			704.667	0.126007
																			705.398	2.24175
																			705.535	3.3905
																			705.589	3.3762
																			706.369	0.0711455
																			706.505	0.121661
																			706.699	0.168931
																			707.254	0.046122
																			707.424	0.108963
																			707.596	0.0436967
																			708.42	0.0519072
																			709.471	0.0553446
																			709.589	0.140547
																			709.596	0.197867
																			710.174	0.587201
																			710.293	0.519003
																			710.328	0.273061
																			711.158	0.182807
																			711.324	0.0748099
																			711.458	0.145795
																			712.273	0.0292834
																			712.498	0.127396
																			712.904	0.0406872
																			713.541	0.0883197
																			713.839	0.0229779
																			714.452	0.0381318	y6
																			715.023	0.0803412	y6
																			715.428	0.374102	-
																			715.588	0.116617
																			715.843	0.0510236
																			716.564	0.193086
																			716.656	0.270289
																			717.28	0.0156633
																			717.488	0.0342148
																			717.839	0.362042
																			718.263	0.00378236
																			718.896	0.207246
																			718.957	0.139509
																			719.423	0.0570662
																			719.999	0.269793
																			720.31	0.345242
																			720.326	0.323039
																			720.889	0.0603305
																			721.199	0.0571014
																			721.549	0.021865
																			722.413	0.122996
																			722.453	0.0875029
																			722.885	0.0784741
																			723.358	0.188213
																			724.152	0.341529
																			724.437	0.283542
																			724.792	0.181651
																			724.902	1.03314
																			725.372	0.316446
																			725.652	0.36167
																			725.66	0.177978
																			726.272	0.0994545
																			726.46	0.167938
																			726.756	0.0487938
																			726.982	0.0763891
																			728.32	1.37481	y6
																			728.409	1.37843	y6
																			728.436	1.2271	y6
																			729.273	0.13413
																			729.449	0.322055
																			729.475	0.452133
																			730.07	0.241971
																			730.725	0.0591317
																			730.739	0.135363
																			731.348	0.251101
																			731.486	0.0700757
																			731.83	0.113254
																			732.409	0.21894
																			732.41	0.0759902
																			733.342	0.0941352
																			733.712	0.4004
																			734.433	0.23062
																			735.079	0.165705
																			735.278	0.208525
																			735.361	0.0187922
																			736.472	0.0563679
																			736.527	0.219604
																			736.801	0.482001
																			738.163	5.46474	b7
																			738.166	6.03338	b7
																			738.208	5.90348	b7
																			739.119	2.05613
																			739.155	1.22419
																			739.236	0.656428
																			740	0.0722188
																			740.108	0.074305
																			740.663	0.248614
																			740.878	0.0829469
																			741.474	0.224371
																			741.496	0.0080675
																			741.617	0.02226
																			742.649	0.116391
																			743.089	0.972404
																			743.476	0.787436
																			744.024	1.02603
																			744.142	1.17851
																			744.285	0.648927
																			744.755	0.0452134
																			745.174	0.196851
																			745.423	0.0635601
																			745.467	0.0475386
																			746.16	0.0920125
																			746.541	0.280834
																			747.135	0.165684
																			747.798	0.138423
																			747.859	0.0146154
																			748.673	0.148281
																			748.72	0.160547
																			748.851	0.0117941
																			749.393	0.343903
																			749.699	0.206275
																			750.22	0.520388
																			750.34	0.263794
																			750.378	0.352724
																			751.015	0.0259845
																			751.43	0.0150039
																			752.054	1.11447	b7
																			752.285	0.373172
																			752.894	3.89023	b7
																			752.895	4.70875	b7
																			752.935	2.7292
																			753.509	1.24593
																			753.557	1.2236
																			753.767	0.32429
																			754.382	0.0919973
																			754.645	0.0490859
																			754.694	0.0215679
																			755.418	0.0080303
																			755.487	0.0101926
																			755.98	0.0551396
																			756.445	0.0232594
																			759.993	0.010616
																			760.462	0.012905
																			762.984	0.0234241
																			767.052	0.0270588
																			768.69	0.0193742
																			772.036	0.00874551
																			773.964	0.0167783
																			774.187	0.0154836
																			775.512	0.0285521
																			776.597	0.0308706
																			776.841	0.107278
																			777.343	0.0364708
																			777.44	0.116006
																			778.04	0.202885
																			778.276	0.0428947
																			778.663	0.0309614
																			778.918	0.00838674
																			779.202	0.0573286
																			780.04	0.0683577
																			780.59	0.0223412
																			781.084	0.0858028
																			781.536	0.0417349
																			784.165	0.0147419
																			785.38	6.68985	y7
																			785.39	6.52171	y7
																			785.404	7.79317	y7
																			786.488	2.01067
																			786.496	2.46306
																			786.654	0.408545
																			787.332	0.0232565
																			787.682	0.040012
																			789.186	0.0094431
																			790.004	0.169222
																			791.979	0.0143605
																			792.246	0.0722462
																			793.152	0.0245731
																			794.486	0.313524
																			794.638	0.171945
																			795.136	1.22197	b8
																			795.314	0.670381	b8
																			795.388	0.988403	b8
																			796.127	0.283342
																			796.255	0.0359102
																			796.262	0.252336
																			797.28	0.00779349
																			797.32	0.0724493
																			798.144	0.0682924
																			798.22	0.0709476
																			799.753	0.0148008
																			800.464	0.016547
																			801.383	0.0212159
																			802.206	0.0210059
																			802.477	0.00797084
																			802.728	0.039906
																			803.351	0.00974819
																			804.336	0.035292
																			808.223	0.0155628
																			808.397	0.00619124
																			809.044	0.0541152
																			810.114	0.0213146
																			810.487	0.0672922
																			811.541	0.0880738
																			811.99	0.611854
																			812.198	0.742276
																			812.303	0.539512
																			812.927	0.11768
																			813.125	0.088269
																			813.205	0.165692
																			813.734	0.0397713
																			813.735	0.0684665
																			814.739	0.0340489
																			814.882	0.0141983
																			815.736	0.0152659
																			816.675	0.192981
																			817.419	0.0770445
																			817.812	0.041796
																			819.296	0.016074
																			820.536	0.00892186
																			821.715	0.013188
																			823.536	0.00660177
																			824.618	0.0164234
																			825.111	0.0751888
																			826.149	0.00802964
																			826.282	0.0308901
																			826.43	0.0865367
																			827.013	0.0156534
																			827.191	0.0671899
																			828.53	0.0339344
																			828.548	0.0616108
																			828.603	0.0483775
																			830.734	0.0556609
																			830.965	0.0237071
																			833.555	0.0235331
																			833.978	0.0577706
																			835.76	0.0674243
																			837.073	0.0278404
																			838.467	0.016558
																			839.659	0.0167265
																			839.773	0.195216
																			840.475	0.067304
																			841.349	0.0470989
																			842.004	0.0144083
																			842.278	0.0967535
																			842.955	0.183916
																			844.446	0.151733
																			845.659	0.0229891
																			845.803	0.0302763
																			846.578	0.0330868
																			846.59	0.0322844
																			847.239	0.184929
																			848.305	0.0512921
																			848.337	0.0182809
																			849.093	0.109765
																			849.738	0.0128566
																			850.063	0.0631977
																			850.45	0.0183961
																			851.042	0.0273422
																			851.714	0.056837
																			852.554	0.0165182
																			852.559	0.0406733
																			854.114	0.11777
																			855.318	0.125778
																			855.509	0.137573
																			856.428	0.0181995
																			856.431	0.0247141
																			857.073	0.0343717
																			857.27	0.035756
																			858.242	0.0130737
																			858.368	0.043765
																			862.218	0.0262953
																			863.027	0.0789399
																			863.518	0.0657964
																			863.56	0.0271566
																			864.083	0.0487295
																			864.262	0.0181551
																			864.576	0.0430244
																			865.728	0.0863177
																			866.185	0.053359
																			866.488	0.101914
																			866.786	0.0404395
																			867.262	0.0469723
																			867.303	0.0132367
																			867.518	0.0216131
																			868.459	0.0890059
																			869.005	0.0640284
																			869.287	0.0592365
																			870.83	0.0125877
																			873.541	0.0318499
																			874.631	0.0091428
																			874.754	0.132502
																			876.21	0.0149696
																			876.576	0.0225226
																			877.592	0.0352094
																			877.654	0.0187383
																			878.548	0.00579568
																			880.345	0.02638
																			880.831	0.059322
																			881.186	0.0200269
																			881.598	0.0124025
																			881.964	0.0499703
																			882.297	0.00517542
																			882.481	0.100404
																			883.789	0.13788	y8
																			884.48	0.0269255	y8
																			885.218	0.0754389
																			885.302	0.0132166	y8
																			886.342	0.0765234
																			888.618	0.0222646
																			888.872	0.0298737
																			890.587	0.0627442
																			891.31	0.0233121
																			893.802	0.079353
																			894.489	0.0245415
																			895.326	0.0262317
																			896.327	0.00759902
																			896.717	0.0163643
																			897.3	0.0336577
																			897.323	0.0205569
																			898.45	0.677195	y8
																			898.488	0.814741	y8
																			898.493	0.731816	y8
																			899.237	0.0235448
																			899.549	0.243393
																			899.679	0.263195
																			899.873	0.0341104
																			902.332	0.0441736
																			903.108	0.0134454
																			903.568	0.0212241
																			903.919	0.0505123
																			905.064	0.0527244
																			905.484	0.00962879
																			905.507	0.039842
																			906.529	0.0210339
																			908.01	0.0241392
																			908.429	0.0249725
																			909.147	0.00602626
																			909.736	0.0786239
																			912.446	0.0528167
																			913.191	0.00644885
																			914.371	0.00959449
																			915.037	0.0125701
																			918.008	0.00604516
																			920.037	0.124585
																			920.504	0.0730694
																			920.568	0.113098
																			921.401	0.188331
																			921.513	0.0584657
																			922.071	0.0275443
																			922.115	0.00662315
																			922.739	0.0202095
																			922.932	0.0588658
																			923.729	0.0927895
																			924.474	0.017621
																			924.515	0.0380134
																			927.377	0.032928	y9
																			928.057	0.0736445	y9
																			928.297	0.0542903
																			928.608	0.00942808
																			929.277	0.0700891
																			931.566	0.0495155
																			932.021	0.0758999
																			933.399	0.0876899
																			933.422	0.0934093
																			934.445	0.0570527
																			935.148	0.024242
																			936.263	0.0228561
																			937.425	0.330376
																			937.431	0.228976
																			937.54	0.237505
																			938.354	0.0145056
																			938.459	0.135815
																			938.599	0.0328039
																			939.246	0.0175223
																			939.486	0.040748
																			940.976	0.0779827
																			941.523	0.0177654	y9
																			941.742	0.0397561	y9
																			942.063	0.0605111	y9
																			942.696	0.026789
																			943.684	0.00511446
																			943.923	0.0644101
																			945.438	0.00917438
																			946.39	0.0558608
																			947.367	0.00587964
																			947.988	0.0120585
																			948.529	0.243922
																			948.604	0.019421
																			949.004	0.0662056
																			950.311	0.0544247
																			951.405	0.0168564
																			952.43	0.0554253
																			953.577	0.0419033
																			955.475	4.04262	y9
																			955.479	3.59489	y9
																			955.484	4.77189	y9
																			956.44	0.369671
																			956.474	1.60309
																			956.5	1.2093
																			957.29	0.0179349
																			957.416	0.0600511
																			957.426	0.0618396
																			958.467	0.0651936
																			958.469	0.00988251
																			961.433	0.298565
																			961.454	0.455431
																			961.472	0.485741
																			962.368	0.0839175
																			962.374	0.0783958
																			963.386	0.0620451
																			965.794	0.0615143
																			967.491	0.0527461
																			968.106	0.0219329
																			969.248	0.0225171
																			970.73	0.0709005
																			971.411	0.0281485
																			972.748	0.0166698
																			975.439	0.0228083
																			976.39	0.0472039
																			976.626	0.0204967
																			977.701	0.0322392
																			979.193	5.36492	b9
																			979.204	5.69515	b9
																			979.221	4.87264	b9
																			980.23	0.373192
																			980.296	1.74389
																			980.341	1.77395
																			981.308	0.0521012
																			981.458	0.0161441
																			981.467	0.052588
																			982.159	0.031511
																			982.288	0.00482259
																			983.631	0.00872038
																			984.169	0.0534411
																			984.762	0.00571447
																			985.714	0.0192969
																			985.835	0.0516392
																			985.954	0.00798447
																			986.883	0.144542
																			987.658	0.00730554
																			989.36	0.0194201
																			990.169	0.0642178
																			990.773	0.0155864
																			993.258	0.192965	b9
																			993.3	0.112142	b9
																			993.984	0.0312326
																			994.227	0.0500119
																			995.375	0.0198436
																			996.9	0.0237773
																			997.672	0.0576944
																			998.561	0.0274981
																			999.196	0.0235741
																			999.197	0.0712825
																			1001.24	0.0260636
																			1002.64	0.0192091
																			1003.11	0.0748301
																			1005.33	0.0166814
																			1006.44	0.0472802
																			1006.69	0.0350138
																			1007.9	0.0425132
																			1008.56	0.0430726
																			1009.34	0.0121808
																			1009.4	0.0279727
																			1010.68	0.0360268
																			1012.38	0.0380184
																			1013.2	0.0277836
																			1014.26	0.0286502
																			1014.38	0.0144902
																			1015.28	0.055927
																			1016.66	0.0491173
																			1017.73	0.104633
																			1018.4	0.124041
																			1018.46	0.247309
																			1018.62	0.151737
																			1019.34	0.056911
																			1019.52	0.0630149
																			1019.57	0.122384
																			1020.53	0.0124276
																			1025.32	0.0323516
																			1027.39	0.0521177
																			1027.51	0.0132264
																			1030.31	0.0624532
																			1031.36	0.00843924
																			1031.9	0.00395104
																			1032.53	0.0353928
																			1032.76	0.019638
																			1036.13	1.07912	b10
																			1036.24	1.01407	b10
																			1036.3	1.07969	b10
																			1036.91	0.0766567
																			1037.21	0.345856
																			1037.3	0.44153
																			1037.55	0.0829443
																			1038.33	0.0190207
																			1038.63	0.0176413
																			1038.78	0.0217304
																			1039.27	0.00990529
																			1039.44	0.0415412
																			1040.33	0.0112996
																			1040.96	0.0274191
																			1041.13	0.0280888
																			1041.65	0.121665
																			1042.06	0.0297066
																			1044.46	0.244593
																			1046.2	0.0518479
																			1047.51	0.0374184
																			1047.77	0.0922352
																			1048.93	0.0365182
																			1050.13	0.107	b10
																			1050.33	0.0256708	b10
																			1051.16	0.0812666	b10
																			1051.72	0.00979099
																			1052.46	0.0643613
																			1052.87	0.111854
																			1053.35	0.0587323
																			1054.51	0.042715
																			1054.72	0.0255386
																			1057.14	0.0163349
																			1058.3	0.0358504
																			1060.34	0.040425
																			1062.9	0.0567263
																			1064.22	0.113176
																			1065.26	0.0898591
																			1065.42	0.105982
																			1065.48	0.0801518
																			1066.35	0.0301932
																			1066.43	0.0185756
																			1067.37	0.0333105
																			1068.4	0.0271069
																			1068.4	0.0333771
																			1069.33	0.0196138
																			1069.55	0.0152432
																			1070.64	0.019264
																			1071.24	0.0189369
																			1071.28	0.0398586
																			1072.51	0.0599693
																			1072.71	0.0335658
																			1075.25	0.0814743
																			1075.36	0.0459083
																			1075.42	0.0649002
																			1076.35	0.00777701
																			1076.64	0.0476982
																			1077	0.0135424
																			1080.69	0.0237602
																			1084.25	0.0285543
																			1085.58	0.0234267
																			1087.3	0.0256121
																			1088.39	0.0107583
																			1089.42	0.0140549
																			1091.5	0.0447248
																			1093.26	0.716403	b11
																			1093.28	0.633993	b11
																			1093.37	0.535794	b11
																			1094.26	0.170408
																			1094.29	0.237212
																			1094.61	0.0174327
																			1095.38	0.0132064
																			1096.2	0.0319408
																			1097.41	0.0310665
																			1104.89	0.0738425
																			1105.84	0.0518083
																			1106.45	0.008964
																			1106.47	0.0267595
																			1107.21	0.0144319	b11
																			1107.37	0.0374556	b11
																			1107.64	0.0424871	b11
																			1108.64	0.00729559
																			1108.72	0.0121226
																			1109.69	0.111434
																			1111.31	0.0241888	y10
																			1111.33	0.0314502	y10
																			1111.98	0.0106657
																			1113.48	0.0159601
																			1118.08	0.0150586
																			1118.67	0.0040715
																			1119.43	0.0262573
																			1121.66	0.0342627
																			1124.28	0.0253046
																			1125.56	0.217921	y10
																			1125.59	0.149666	y10
																			1125.73	0.241167	y10
																			1126.49	0.113073
																			1126.6	0.063676
																			1126.89	0.0151518
																			1127.36	0.012995
																			1128.05	0.0320991
																			1128.65	0.0147613
																			1128.71	0.00963991
																			1129.56	0.0162332
																			1129.92	0.0173521
																			1131.37	0.0108465
																			1131.54	0.0504796
																			1134.08	0.0199568
																			1136.24	0.026563
																			1136.4	0.0596168
																			1136.44	0.0469155
																			1137.25	0.0166343
																			1138.5	0.00785587
																			1141.5	0.0183749
																			1145.29	0.0125921
																			1146.44	0.183749
																			1146.48	0.229084
																			1146.63	0.12513
																			1147.26	0.0289223
																			1147.4	0.12143
																			1147.46	0.0692573
																			1148.68	0.00985619
																			1148.95	0.0151298
																			1153.08	0.0154897
																			1153.64	0.0622609
																			1153.72	0.0160838
																			1159.83	0.0138988
																			1160.45	0.101307
																			1161.49	0.0260897
																			1162.56	0.0131349
																			1163.45	0.0757906
																			1164.16	1.33452	b12
																			1164.23	1.09981	b12
																			1164.3	1.33711	b12
																			1165.23	0.58521
																			1165.23	0.990074
																			1165.38	0.0930032
																			1166.12	0.0244704
																			1166.26	0.0192068
																			1168.32	0.0373457	y11
																			1168.52	0.00572004	y11
																			1169.07	0.00947529	y11
																			1172.24	0.0409058
																			1173.2	0.0216783
																			1174.38	0.0141857
																			1177.77	0.0360098
																			1178.43	0.0381264	b12
																			1178.84	0.0954547	b12
																			1181.18	0.128411
																			1181.18	0.162854
																			1181.45	0.154934
																			1182.54	0.456698	y11
																			1182.61	0.399712	y11
																			1182.66	0.395414	y11
																			1183.36	0.0583409
																			1183.68	0.252505
																			1183.69	0.0247286
																			1184.03	0.086465
																			1184.52	0.0639796
																			1184.61	0.0297253
																			1185.91	0.00577504
																			1193.33	0.0244504
																			1195.65	0.0557436
																			1201.94	0.0150152
																			1202.87	0.00576853
																			1203.61	0.00702477
																			1204.75	0.0189247
																			1206.58	0.0619046
																			1209.1	0.0567035
																			1210.56	0.0306654
																			1215.45	0.00394888
																			1216.85	0.0247699
																			1217.48	0.0060809
																			1218.41	0.0103517
																			1221.4	0.110406
																			1221.5	0.0957262
																			1221.55	0.114562
																			1222.29	0.064921
																			1222.66	0.0512099
																			1223.07	0.0628838
																			1234.95	0.0599779
																			1235.68	0.0391648
																			1236.6	0.0326777
																			1236.72	0.015626
																			1237.47	0.0109779
																			1239.04	0.0878669
																			1239.63	0.793718	y12
																			1239.68	0.882546	y12
																			1239.69	0.764291	y12
																			1240.45	0.305857
																			1240.68	0.128461
																			1240.74	0.211458
																			1244.78	0.0279147
																			1245.55	0.0111112
																			1253.13	0.0127312
																			1253.65	0.0205826
																			1255.24	0.0235321
																			1255.24	0.0216249
																			1256.9	0.015302
																			1257.43	0.0205419
																			1258.23	0.0320861
																			1261.34	0.00490612
																			1262.23	0.0374936
																			1263.23	0.0143222
																			1263.43	0.0309111
																			1270.57	0.0157374
																			1271.56	0.0270661
																			1271.86	0.0209373
																			1273.24	0.0138169
																			1273.55	0.0181718
																			1274.45	0.0212937
																			1274.57	0.00939704
																			1275.28	0.0166603
																			1276.52	0.0277023
																			1281.31	0.0176034
																			1282.2	0.0101986
																			1282.94	0.0296773
																			1290.49	0.0351636
																			1291.41	0.00691608
																			1292.11	0.026576
																			1305.97	0.0960169
																			1306.84	0.0132796
																			1310.76	0.0384167
																			1311.8	0.0324023
																			1312.43	0.00688487
																			1314.43	0.0117491
																			1314.6	0.0467341
																			1317.59	0.0265178
																			1318.4	0.0246797
																			1319.81	0.020553
																			1319.89	0.0169539
																			1326.61	0.0159437
																			1327.42	0.0216915
																			1327.47	0.153348
																			1327.75	0.0905796
																			1328.53	0.13206
																			1328.55	0.0747228
																			1328.59	0.13241
																			1329.3	0.0417516
																			1329.44	0.0465084
																			1330.12	0.205887
																			1330.39	0.211535
																			1330.52	0.407485
																			1331.45	0.122573
																			1331.52	0.255102
																			1331.62	0.0724912
																			1332.33	0.0527205
																			1332.41	0.0112315
																			1337.58	0.0611673
																			1338.72	0.0352244
																			1344.28	0.0207906
																			1345.13	0.00887658
																			1346.05	0.0453678
																			1348.3	2.29617	b13
																			1348.32	1.8223	b13
																			1348.36	2.07163	b13
																			1349.35	0.237116
																			1349.47	1.05838
																			1349.49	0.844461
																			1350.03	0.017004
																			1350.34	0.0243025
																			1356.14	0.00907594
																			1362.89	0.0380776
																			1365	0.0156353
																			1366.58	0.00416562
																			1366.62	0.0163363
																			1367.46	0.0225801
																			1374.91	0.020298
																			1376.97	0.0347008
																			1383.04	0.024554
																			1385.76	0.0145883
																			1387.08	0.0283348
																			1467.72	0.0374772
																			1523.67	0.0273013
																			1574.71	0.0154248
																			1594.63	0.00813816
																			1617.65	0.00748569
																			1712.34	0.00434348
																			1734.47	0.0193101
																			1877.11	0.00368353
																			1937.9	0.00799401
																			1972.26	0.00707151

## Sheet: suH4 3ac list
SPECTRUM - MS						SPECTRUM - MS						SPECTRUM - MS							213.34	0.0112706	fragment ion					fragment ion		K5ac	K5pr
Leonen-H4K12su-Chromatin-MSMS.RAW						Leonen-H4K12su-Chromatin-MSMS.RAW						Leonen-H4K12su-Chromatin-MSMS.RAW							224.154	0.00786741						b2		0.438207	nd
ITMS + c NSI d Full ms2 755.09@cid35.00 [195.00-2000.00]						ITMS + c NSI d Full ms2 755.15@cid35.00 [195.00-2000.00]						ITMS + c NSI d Full ms2 755.50@cid35.00 [195.00-2000.00]							228.028	0.0158542						b2		0.454459	nd
Scan #: 3935		SUM				Scan #: 4010		SUM				Scan #: 3870		SUM					228.281	0.0141722						b2		0.319853	nd
RT: 28.70		173289				RT: 29.12		26502.5				RT: 28.32		65962.3					229.19	0.0172545						b3		0.452819	0.0626973
Data points: 290						Data points: 501						Data points: 462							229.809	0.00876826						b3		0.364303	0.0442219
Mass	Intensity	Normalized intensity				Mass	Intensity	Normalized intensity				Mass	Intensity	Normalized intensity					241.038	0.0348564						b3		0.262572	0.0341975
228.281	24.5589	0.0141722				224.154	2.08506	0.00786741				213.34	7.43437	0.0112706					242.058	0.0753784						b4		0.489631	nd
264.413	18.4218	0.0106307				229.19	4.57287	0.0172545				228.028	10.4578	0.0158542					242.096	0.020229						b4		0.518453	nd
267.327	25.2648	0.0145795				229.809	2.32381	0.00876826				242.096	13.3435	0.020229					244.293	0.0282209						b4		0.67685	nd
268.094	8.82538	0.00509286				241.038	9.23783	0.0348564				244.812	5.48247	0.00831151					244.812	0.00831151
284.023	759.365	0.438207				242.058	19.9772	0.0753784				255.286	2.35096	0.0035641					246.475	0.0364274						fragment ion		K5ac,K8ac	K5,8 ac/pr
285.016	293.356	0.169287				244.293	7.47926	0.0282209				256.241	3.19676	0.00484634					249.136	0.0103779						b5		2.45425	0.0134817
286.07	15.7647	0.00909736				246.475	9.65418	0.0364274				258.182	15.0855	0.0228698					255.286	0.0035641						b5		2.08164	0.0657943
294.204	21.1939	0.0122304				249.136	2.75042	0.0103779				265.311	4.61548	0.00699715					255.398	0.0867154						b5		1.57387	nd
296.184	34.2438	0.0197611				255.398	22.9817	0.0867154				266.113	14.1688	0.0214802					256.067	0.00781751						b6		3.21873	0.0716129
299.549	34.5668	0.0199475				256.067	2.07184	0.00781751				268.32	13.9312	0.02112					256.241	0.00484634						b6		2.82799	0.0415771
302.171	11.4359	0.00659932				264.099	13.9505	0.0526385				281.189	14.4367	0.0218863					258.182	0.0228698						b6		2.08507	nd
311.279	65.4029	0.037742				265.208	11.3322	0.0427591				284.048	299.771	0.454459					264.099	0.0526385						b7		6.91352	nd
322.902	111.907	0.0645782				273.335	1.37233	0.00517813				285.143	104.708	0.158739					264.413	0.0106307						b7		5.64884	nd
325.293	51.0039	0.0294328				280.224	10.2644	0.03873				286.181	10.6507	0.0161466					265.208	0.0427591						b7		4.83716	nd
327.059	113.224	0.0653383				280.827	2.41551	0.00911425				291.203	8.079	0.0122479					265.311	0.00699715						b8		1.78671	nd
328.087	221.85	0.128023				281.841	17.4938	0.0660082				293.162	3.11026	0.00471521					266.113	0.0214802						b8		1.03931	nd
329.319	19.7709	0.0114092				284.065	84.769	0.319853				302.075	37.5026	0.0568547					267.327	0.0145795						b8		0.576232	nd
338.347	25.2985	0.014599				285.086	46.3386	0.174846				306.505	6.76135	0.0102503					268.094	0.00509286
339.116	112.061	0.0646668				288.963	10.8062	0.0407743				310.197	24.0781	0.0365028					268.32	0.02112						fragment ion		K5ac,K8ac,K12ac	K5,8,12 ac/ac/pr
341.053	784.686	0.452819				295.34	6.3521	0.0239679				311.142	6.77662	0.0102735					273.335	0.00517813						b9		0.0539767	5.58781
342.086	70.0136	0.0404027				299.087	9.35702	0.0353062				313.458	6.87242	0.0104187					280.224	0.03873						b9		0.0529533	6.62794
343.057	6.20967	0.00358341				302.259	12.5247	0.0472585				319.191	24.2614	0.0367807					280.827	0.00911425						b9		nd	5.28822
345.133	3198.6	1.84582				307.817	8.79632	0.0331905				323.238	11.603	0.0175903					281.189	0.0218863						b10		nd	1.38467
346.166	45.5845	0.0263054				310.896	13.874	0.0523498				324.397	8.9158	0.0135165					281.841	0.0660082						b10		nd	1.08936
349.095	10.9259	0.00630499				316.386	6.12182	0.023099				327.742	68.7009	0.104152					284.023	0.438207	b2					b10		nd	1.36106
355.659	76.6319	0.0442219				323.175	26.5275	0.100094				328.466	26.5335	0.0402252					284.048	0.454459	b2					b11		nd	0.596732
358.206	57.7279	0.033313				327.336	19.3915	0.0731685				336.329	15.2239	0.0230797					284.065	0.319853	b2					b11		nd	0.970498
359.569	20.3742	0.0117573				328.206	36.5296	0.137835				339.165	4.20415	0.00637356					285.016	0.169287						b11		nd	0.561321
363.958	95.3748	0.0550379				338.228	4.0853	0.0154148				341.063	240.303	0.364303					285.086	0.174846						b12		0.00974651	0.995951
366.875	23.9303	0.0138095				340.442	14.5933	0.0550637				342.12	95.3156	0.1445					285.143	0.158739						b12		0.0440223	1.37401
369.825	14.4533	0.00834055				341.203	69.5882	0.262572				342.788	3.79382	0.0057515					286.07	0.00909736						b12		nd	1.78866
380.454	25.1747	0.0145275				342.255	18.7548	0.0707663				345.155	795.47	1.20595					286.181	0.0161466
381.151	74.9116	0.0432292				345.235	228.883	0.863627				346.331	199.651	0.302674					288.963	0.0407743						fragment ion		K16pr	K16ac
386.455	67.1661	0.0387596				346.377	2.14712	0.00810156				353.969	25.0067	0.0379105					291.203	0.0122479						y2		0.00907321	1.84582
397.345	278.846	0.160913				350.166	4.54529	0.0171504				356.003	25.4448	0.0385747					293.162	0.00471521						y2		0.0117573	1.20595
398.233	1172.91	0.67685				354.217	7.72053	0.0291313				357.18	14.906	0.0225978					294.204	0.0122304						y2		nd	0.863627
399.228	95.4166	0.055062				355.065	16.6163	0.0626973				358.124	5.0915	0.0077188					295.34	0.0239679						y3		nd	0.808047
406.247	23.1339	0.0133499				355.925	9.0632	0.0341975				367.798	10.5005	0.015919					296.184	0.0197611						y3		nd	0.880717
415.033	1025.88	0.592004				359.302	2.40463	0.00907321				368.657	21.0499	0.031912					299.087	0.0353062	297.5					y3		nd	0.508664
416.27	1526.19	0.880717				361.453	5.62461	0.0212229				370.958	9.57277	0.0145125					299.549	0.0199475	299.1					y4		nd	1.89039
417.191	136.468	0.0787515				362.712	7.13943	0.0269387				372.148	6.15498	0.00933106					302.075	0.0568547						y4		nd	1.62333
427.381	46.1586	0.0266367				363.454	5.26319	0.0198592				373.032	7.35449	0.0111495					302.171	0.00659932						y4		nd	1.58531
438.332	64.9642	0.0374889				366.114	35.4224	0.133657				374.142	4.55574	0.00690659					302.259	0.0472585						y5		0.0311266	7.96457
447.445	76.0415	0.0438813				369.511	9.90116	0.0373593				377.289	19.9618	0.0302625					306.505	0.0102503						y5		0.0731489	11.1428
454.495	23.484	0.0135519				370.338	13.8148	0.0521264				378.18	17.8729	0.0270956					307.817	0.0331905						y5		0.0756628	9.67787
455.187	227.688	0.131392				371.13	18.9342	0.0714429				380.921	24.5903	0.0372794					310.197	0.0365028
456.33	62.8765	0.0362842				373.36	8.16724	0.0308169				381.884	7.36183	0.0111607					310.896	0.0523498						fragment ion		K12,16 ac/pr	K12ac,K16ac
458.986	32.4625	0.0187332				380.241	2.11375	0.00797568				388.267	19.8745	0.0301301					311.142	0.0102735						y6		1.39066	0.020321
468.089	15.049	0.00868433				381.291	18.445	0.069597				390.24	12.7889	0.0193883					311.279	0.037742						y6		2.02886	0.0430706
471.304	89.4939	0.0516442				383.123	4.82329	0.0181994				397.282	67.3875	0.102161					313.458	0.0104187						y6		1.03887	nd
473.198	3275.85	1.89039				384.119	15.0324	0.0567205				398.188	341.984	0.518453					316.386	0.023099						y7		4.35904	nd
474.308	202.429	0.116815				385.469	4.49019	0.0169425				399.143	71.2695	0.108046					319.191	0.0367807						y7		5.60154	nd
480.361	30.7911	0.0177686				387.184	2.95469	0.0111487				401.098	7.78404	0.0118007					322.902	0.0645782						y7		3.78125	nd
483.261	60.3945	0.0348519				388.85	3.2771	0.0123653				409.524	18.5845	0.0281744					323.175	0.100094						y8		1.36697	nd
484.168	49.3935	0.0285035				389.689	3.34221	0.0126109				415.038	352.737	0.534756					323.238	0.0175903						y8		0.726796	nd
485.294	42.8738	0.0247412				394.417	4.7292	0.0178444				416.207	533.006	0.808047					324.397	0.0135165						y8		0.830468	nd
494.548	32.954	0.0190168				395.404	1.84268	0.00695283				417.364	74.8751	0.113512					325.293	0.0294328						y9		5.2742	nd
500.112	42.8489	0.0247268				397.173	30.0017	0.113203				420.885	10.0696	0.0152657					327.059	0.0653383						y9		4.13771	nd
502.292	44.2509	0.0255359				398.138	129.764	0.489631				423.029	6.73681	0.0102131					327.336	0.0731685						y9		3.95083	nd
503.346	33.8989	0.019562				399.368	10.9444	0.0412959				426.001	9.76847	0.0148092					327.742	0.104152
506.395	26.7271	0.0154234				403.08	5.72387	0.0215975				427.301	14.4241	0.0218672					328.087	0.128023						fragment ion		K8,12,16 ac/ac/pr	K8ac,K12ac,16ac
507.504	22.695	0.0130966				406.031	16.0746	0.060653				430.228	25.5679	0.0387613					328.206	0.137835						y10		0.243587	nd
511.145	13.2615	0.00765282				410.647	1.8138	0.00684387				432.081	9.57815	0.0145206					328.466	0.0402252						y10		0.2414	nd
512.349	670.711	0.387047				414.677	33.5289	0.126512				434.499	5.76504	0.0087399					329.319	0.0114092						y10		0.27676	nd
513.318	108.263	0.0624754				415.358	66.6524	0.251495				437.137	4.26771	0.00646993					336.329	0.0230797						y11		0.174122	nd
524.415	29.1743	0.0168356				416.346	134.809	0.508664				438.308	25.9246	0.0393022					338.228	0.0154148						y11		0.397495	nd
526.1	46.5502	0.0268627				417.341	9.76214	0.0368348				439.604	9.92888	0.0150524					338.347	0.014599						y11		0.301991	nd
530.229	19309.4	11.1428				418.387	9.03388	0.0340869				440.206	7.63166	0.0115697					339.116	0.0646668						y12		0.55533	nd
531.297	1418.24	0.818424				419.147	3.89949	0.0147137				446.745	32.3692	0.0490723					339.165	0.00637356						y12		1.18412	nd
535.48	64.911	0.0374582				422.287	7.42103	0.0280013				450.232	10.0884	0.0152942					340.442	0.0550637						y12		1.05164	nd
536.442	65.0558	0.0375417				424.488	8.13127	0.0306811				451.119	11.6548	0.0176689					341.053	0.452819	b3
539.4	39.9431	0.0230499				425.964	8.39897	0.0316912				454.099	4.05637	0.00614953					341.063	0.364303	b3
540.658	41.34	0.023856				430.622	6.94117	0.0261906				455.118	117.725	0.178473					341.203	0.262572	b3
544.369	53.9391	0.0311266				431.323	6.25428	0.0235988				456.39	17.4386	0.0264372					342.086	0.0404027
545.534	107.048	0.0617739				438.169	16.8946	0.0637474				457.561	8.46425	0.012832					342.12	0.1445
549.285	13.2851	0.00766641				439.87	1.58658	0.00598652				459.237	10.96	0.0166156					342.255	0.0707663
550.344	637.002	0.367595				441.216	29.4429	0.111095				459.977	10.7556	0.0163057					342.788	0.0057515
556.303	460.223	0.265581				442.358	8.54677	0.0322489				461.254	10.5724	0.016028					343.057	0.00358341
557.019	68.2794	0.039402				449.195	15.4748	0.0583898				462.424	14.1855	0.0215055					345.133	1.84582	y2
558.375	11.6866	0.006744				450.944	2.76097	0.0104178				463.907	21.7626	0.0329925					345.155	1.20595	y2
560.652	25.8401	0.0149115				452.731	23.4055	0.0883145				467.033	6.95313	0.0105411					345.235	0.863627	y2
562.231	110.308	0.0636554				453.468	5.23888	0.0197675				471.169	8.57179	0.012995					346.166	0.0263054
563.303	65.2347	0.037645				455.175	62.8318	0.237079				473.275	1070.78	1.62333					346.331	0.302674
565.157	22.9388	0.0132373				458.168	9.57683	0.0361356				474.204	239.805	0.363549					346.377	0.00810156
566.275	47.69	0.0275205				464.374	7.88139	0.0297383				475.784	26.8087	0.0406425					349.095	0.00630499
568.068	4252.96	2.45425				466.366	6.1189	0.023088				481.124	8.86021	0.0134322					350.166	0.0171504
568.68	152.447	0.0879723				468.087	15.713	0.0592888				482.458	7.11754	0.0107903					353.969	0.0379105
569.283	678.498	0.391541				471.139	6.08513	0.0229606				483.277	10.5639	0.016015					354.217	0.0291313
571.432	68.06	0.0392754				473.295	420.146	1.58531				484.086	9.71312	0.0147253					355.065	0.0626973	b3
573.898	15.5285	0.00896105				474.327	16.5122	0.0623042				490.399	8.03827	0.0121862					355.659	0.0442219	b3
575.923	157.901	0.0911199				475.066	10.1248	0.0382032				494.26	21.3276	0.0323331					355.925	0.0341975	b3
577.239	35.0087	0.0202025				477.172	10.8203	0.0408275				495.344	28.3578	0.0429909					356.003	0.0385747
579.299	75.1187	0.0433487				479.211	27.6831	0.104455				501.135	7.01948	0.0106417					357.18	0.0225978
580.374	97.0872	0.0560261				481.814	5.08162	0.0191741				508.81	7.81816	0.0118525					358.124	0.0077188
581.519	13.246	0.00764387				484.254	5.67837	0.0214258				510.404	30.4844	0.0462149					358.206	0.033313
582.21	23.3623	0.0134817				485.321	5.13366	0.0193705				512.32	138.835	0.210476					359.302	0.00907321	y2
584.721	754.809	0.435578				486.408	2.06253	0.00778238				513.414	91.1974	0.138257					359.569	0.0117573	y2
585.384	251.388	0.145069				488.272	26.9789	0.101798				514.467	12.1292	0.0183881					361.453	0.0212229
586.903	29.7844	0.0171877				489.406	1.76307	0.00665245				518.13	18.8611	0.0285937					362.712	0.0269387
588.749	34.517	0.0199187				490.092	15.0805	0.0569021				520.105	19.8491	0.0300916					363.454	0.0198592
597.346	233.502	0.134747				492.123	6.60228	0.0249119				521.04	7.5902	0.0115069					363.958	0.0550379
598.283	69.6767	0.0402083				493.436	8.72096	0.0329062				522.267	4.36917	0.00662375					366.114	0.133657
600.794	18.6509	0.0107629				494.257	19.2377	0.0725881				524.185	19.8324	0.0300663					366.875	0.0138095
604.339	705.194	0.406946				495.104	25.578	0.0965116				526.251	37.8015	0.0573077					367.798	0.015919
605.014	133.261	0.0769009				496.286	10.7704	0.0406392				528.409	10.651	0.0161471					368.657	0.031912
607.163	135.61	0.0782567				497.177	13.1006	0.0494315				530.254	6383.75	9.67787					369.511	0.0373593
608.144	33.0406	0.0190667				501.522	11.9643	0.0451439				531.301	941.149	1.4268					369.825	0.00834055
610.366	48.5008	0.0279883				502.239	6.00964	0.0226757				532.549	36.0329	0.0546265					370.338	0.0521264
611.2	26.2572	0.0151522				504.173	8.57501	0.0323555				534.394	7.53504	0.0114232					370.958	0.0145125
612.292	18.6317	0.0107518				505.276	10.8964	0.0411145				536.78	7.40697	0.0112291					371.13	0.0714429
613.36	6352.38	3.66576				509.362	23.4205	0.088371				540.347	1.80502	0.00273644					372.148	0.00933106
614.498	86.2153	0.0497523				510.211	10.5579	0.0398374				542.379	19.6364	0.0297692					373.032	0.0111495
615.256	25.3177	0.0146101				511.147	9.06643	0.0342097				544.427	48.2507	0.0731489					373.36	0.0308169
617.901	16.8486	0.0097228				512.398	75.0376	0.283134				545.483	13.0318	0.0197564					374.142	0.00690659
619.419	97.0128	0.0559831				518.314	9.29555	0.0350742				547.709	2.72487	0.00413095					377.289	0.0302625
620.366	40.5235	0.0233849				520.162	6.42195	0.0242315				550.175	156.032	0.236547					378.18	0.0270956
623.384	49.4523	0.0285374				525.122	22.7831	0.0859657				551.127	5.65264	0.00856951					380.241	0.00797568
625.133	5577.71	3.21873				526.419	54.3521	0.205083				552.366	26.9612	0.0408737					380.454	0.0145275
626.095	859.56	0.496026				527.184	10.1777	0.0384026				554.047	3.4831	0.00528044					380.921	0.0372794
626.973	16.0913	0.00928581				530.214	2110.81	7.96457				555.172	20.6895	0.0313657					381.151	0.0432292
635.911	86.3592	0.0498353				531.242	39.235	0.148042				556.251	67.6135	0.102503					381.291	0.069597
637.327	13.7605	0.00794078				533.274	2.76569	0.0104356				557.016	61.4851	0.0932124					381.884	0.0111607
639.383	72.0487	0.0415771				539.414	39.1877	0.147864				560.276	16.5317	0.0250623					383.123	0.0181994
645.277	20.4517	0.011802				540.215	2.19939	0.0082988				561.18	2.31713	0.00351282					384.119	0.0567205
647.552	13.6769	0.00789251				541.493	8.33439	0.0314476				562.283	13.5471	0.0205376					385.469	0.0169425
650.316	98.3243	0.05674				542.513	3.9963	0.015079				562.899	25.7247	0.0389992					386.455	0.0387596
652.512	7.70141	0.00444425				544.061	58.2928	0.219952				564.647	11.1311	0.016875					387.184	0.0111487
655.064	100.241	0.0578461				544.809	20.0525	0.0756628				565.389	27.7986	0.0421431					388.267	0.0301301
662.268	55.8215	0.0322129				545.478	12.2562	0.0462456				568.086	1373.1	2.08164					388.85	0.0123653
663.215	66.8427	0.0385729				547.717	4.55971	0.0172048				569.159	280.249	0.424863					389.689	0.0126109
664.2	39.5751	0.0228376				549.067	7.45866	0.0281432				570.366	32.0294	0.0485571					390.24	0.0193883
676.541	8.80607	0.00508172				550.453	58.9198	0.222318				570.968	19.1211	0.0289879					394.417	0.0178444
678.22	219.844	0.126865				551.176	12.6886	0.047877				572.182	12.7504	0.0193299					395.404	0.00695283
679.387	26.7607	0.0154428				551.806	5.12476	0.0193369				572.98	2.64282	0.00400656					397.173	0.113203
680.475	138.751	0.0800688				552.75	11.509	0.0434259				575.521	2.05766	0.00311944					397.282	0.102161
681.353	308.254	0.177884				554.44	32.1213	0.121201				576.24	55.874	0.0847059					397.345	0.160913
682.532	76.1759	0.0439588				555.104	11.3963	0.0430008				577.053	11.6267	0.0176262					398.138	0.489631	b4
689.487	1070.11	0.617528				556.191	3.9994	0.0150907				579.375	10.4031	0.0157713					398.188	0.518453	b4
691.506	54.1144	0.0312278				557.206	7.29863	0.0275394				580.253	28.4871	0.043187					398.233	0.67685	b4
692.228	45.5759	0.0263005				560.471	17.5186	0.0661016				581.849	31.685	0.048035					399.143	0.108046
694.262	412.904	0.238275				562.353	3.21646	0.0121364				582.484	43.3994	0.0657943					399.228	0.055062
695.297	55.1118	0.0318033				565.469	6.42094	0.0242277				584.17	47.1165	0.0714295					399.368	0.0412959
696.44	650.327	0.375284				566.224	23.2022	0.0875472				585.009	397.197	0.602157					401.098	0.0118007
697.586	165.832	0.0956966				567.475	30.9239	0.116683				586.06	59.511	0.0902198					403.08	0.0215975
698.422	4651.26	2.6841				568.146	417.114	1.57387				587.14	22.2155	0.0336792					406.031	0.060653
699.544	146.023	0.0842653				569.304	52.0687	0.196467				591.07	95.4741	0.14474					406.247	0.0133499
702.312	90.5035	0.0522269				570.104	12.579	0.0474636				592.278	18.5598	0.028137					409.524	0.0281744
705.962	82.0881	0.0473706				571.464	1.67262	0.00631119				594.984	104.398	0.15827					410.647	0.00684387
709.639	431.109	0.24878				572.569	7.24509	0.0273374				595.717	19.6024	0.0297176					414.677	0.126512
710.245	1344.49	0.775865				573.225	8.97392	0.0338607				597.228	10.8382	0.016431					415.033	0.592004
711.288	316.625	0.182715				575.642	7.49948	0.0282973				599.972	20.6508	0.031307					415.038	0.534756
712.837	70.9233	0.0409277				577.055	5.74564	0.0216796				602.198	18.2384	0.0276497					415.358	0.251495
714.432	3515.8	2.02886				580.192	15.6405	0.0590154				604.314	137.173	0.207956					416.207	0.808047	y3
715.651	405.739	0.23414				581.008	22.4976	0.0848887				606.066	15.1801	0.0230133					416.27	0.880717	y3
716.354	14.3924	0.00830541				584.747	205.239	0.774412				607.334	87.145	0.132113					416.346	0.508664	y3
717.979	264.382	0.152567				585.645	24.9882	0.094286				608.109	56.4978	0.0856517					417.191	0.0787515
719.083	171.124	0.0987506				587.276	32.895	0.12412				610.128	21.3023	0.0322946					417.341	0.0368348
720.15	455.214	0.26269				588.199	3.72536	0.0140566				610.931	8.1804	0.0124016					417.364	0.113512
721.249	21.4273	0.012365				589.116	5.46276	0.0206123				613.423	1577.15	2.39098					418.387	0.0340869
722.451	105.404	0.0608256				590.781	5.51827	0.0208217				614.567	80.3611	0.121829					419.147	0.0147137
723.645	100.517	0.0580052				592.784	5.40831	0.0204068				615.636	17.7241	0.0268701					420.885	0.0152657
724.315	80.7981	0.0466262				594.754	14.796	0.0558287				617.291	50.3592	0.0763455					422.287	0.0280013
725.632	248.501	0.143402				595.713	4.57676	0.0172691				619.142	13.9415	0.0211355					423.029	0.0102131
727.333	103.448	0.0596965				597.233	29.3491	0.110741				620.813	43.3731	0.0657544					424.488	0.0306811
728.149	248.56	0.143436				598.261	4.52278	0.0170655				622.313	25.8995	0.0392641					425.964	0.0316912
729.928	35.7326	0.0206202				599.006	36.907	0.139259				625.209	1865.4	2.82799					426.001	0.0148092
731.868	432.784	0.249747				600.112	9.67587	0.0365093				626.263	429.554	0.651211					427.301	0.0218672
732.483	194.024	0.111965				601.388	13.1197	0.0495036				627.225	19.5687	0.0296665					427.381	0.0266367
733.214	29.0711	0.0167761				602.919	8.95299	0.0337817				628.945	27.3864	0.0415183					430.228	0.0387613	b3
736.328	547.405	0.315891				604.39	70.8178	0.267212				630.385	29.0981	0.0441132					430.622	0.0261906	b3
737.136	2682.32	1.54789				605.838	26.5772	0.100282				631.424	41.2918	0.0625991					431.323	0.0235988
738.139	11980.4	6.91352				606.765	13.0273	0.0491549				632.995	4.74547	0.00719421					432.081	0.0145206
739.305	1375.35	0.793675				607.482	29.9318	0.112939				633.605	2.57548	0.00390447					434.499	0.0087399
741.128	29.2288	0.0168671				609.316	11.4486	0.0431981				634.961	30.6799	0.0465113					437.137	0.00646993
742.188	108.975	0.062886				610.162	17.9005	0.0675428				636.395	37.8932	0.0574467					438.169	0.0637474
742.939	290.591	0.167692				611.001	7.96706	0.0300615				637.388	13.5289	0.02051					438.308	0.0393022
743.844	73.1643	0.0422209				611.654	32.5865	0.122956				638.441	32.6359	0.0494767					438.332	0.0374889
745.862	6907.34	3.98602				612.255	8.09719	0.0305525				640.343	81.5222	0.123589					439.604	0.0150524
746.521	401.283	0.231569				613.343	538.615	2.03232				642.47	42.8225	0.0649197					439.87	0.00598652
747.966	83.0165	0.0479063				614.303	2.029	0.00765587				643.164	10.1054	0.01532					440.206	0.0115697
748.649	53.8431	0.0310712				615.592	11.9518	0.0450968				645.307	10.8542	0.0164551					441.216	0.111095
753.66	26.7495	0.0154363				616.309	2.1704	0.00818943				646.753	15.4062	0.0233561					442.358	0.0322489
767.285	84.292	0.0486424				617.046	6.59579	0.0248874				648.021	27.063	0.041028					446.745	0.0490723
771.356	9706.87	5.60154				618.389	5.22523	0.019716				650.015	164.409	0.249247					447.445	0.0438813
772.507	823.873	0.475432				619.736	39.4853	0.148987				655.634	12.0132	0.0182123					449.195	0.0583898
777.448	360.693	0.208145				620.4	11.1322	0.0420042				656.68	28.4424	0.0431192					450.232	0.0152942
778.23	85.0414	0.0490748				621.773	12.1303	0.0457703				659.39	5.93468	0.00899708					450.944	0.0104178
785.147	42.8358	0.0247192				624.588	61.4012	0.231681				660.134	22.7511	0.034491					451.119	0.0176689
795.167	3096.18	1.78671				625.267	552.597	2.08507				661.614	21.0883	0.0319702					452.731	0.0883145
796.264	351.487	0.202833				626.278	1.38144	0.00521248				663.212	54.8476	0.0831499					453.468	0.0197675
800.128	11.3425	0.0065454				627.049	43.0306	0.162364				664.453	13.6783	0.0207365					454.099	0.00614953
806.138	32.2636	0.0186184				629.399	34.3482	0.129604				665.841	16.5317	0.0250623					454.495	0.0135519
810.125	44.4618	0.0256575				630.074	7.05318	0.0266132				667.351	12.0365	0.0182475					455.118	0.178473
812.265	1449.82	0.836646				631.392	53.731	0.202739				668.533	109.03	0.165291					455.175	0.237079
813.339	152.519	0.0880141				633.008	9.8429	0.0371395				670.068	13.1635	0.019956					455.187	0.131392
820.15	22.1804	0.0127996				634.091	28.0955	0.106011				670.76	6.87264	0.010419					456.33	0.0362842
821.454	26.9174	0.0155332				635.023	26.9122	0.101546				672.101	21.5702	0.0327008					456.39	0.0264372
828.142	36.6186	0.0211315				636.749	13.6793	0.051615				673.394	6.92401	0.0104969					457.561	0.012832
837.941	12.8417	0.00741056				639.318	18.9792	0.0716129				675.689	45.9431	0.0696505					458.168	0.0361356
842.26	20.1586	0.0116329				640.346	2.36661	0.00892977				678.608	19.3507	0.029336					458.986	0.0187332
845.143	238.147	0.137427				642.974	14.4677	0.0545898				679.66	38.6357	0.0585724					459.237	0.0166156
847.32	28.821	0.0166317				644.574	7.98524	0.0301301				680.262	30.4011	0.0460887					459.977	0.0163057
849.526	7.16549	0.00413499				645.32	22.4594	0.0847445				681.271	254.8	0.386281					461.254	0.016028
850.513	89.9002	0.0518787				648.546	30.1456	0.113746				683.073	131.349	0.199127					462.424	0.0215055
862.566	186.947	0.107882				649.346	13.9283	0.0525548				685.381	5.95667	0.00903042					463.907	0.0329925
866.233	286.432	0.165291				650.564	21.0879	0.0795696				686.446	48.406	0.0733844					464.374	0.0297383
868.659	56.6338	0.0326817				651.752	49.5059	0.186797				687.219	3.71388	0.00563031					466.366	0.023088
875.777	98.1172	0.0566205				652.557	18.2988	0.0690457				687.875	23.634	0.0358296					467.033	0.0105411
881.641	15.1069	0.00871776				653.3	34.1345	0.128797				688.579	21.6172	0.0327721					468.087	0.0592888
884.456	2368.82	1.36697				655.272	18.7525	0.0707576				689.675	108.558	0.164576					468.089	0.00868433
885.684	267.564	0.154403				659.29	2.74808	0.0103691				690.474	53.5239	0.0811432					471.139	0.0229606
891.387	44.5743	0.0257225				660.392	10.435	0.0393737				692.397	28.2087	0.0427649					471.169	0.012995
894.123	21.3375	0.0123132				661.124	7.18523	0.0271115				693.87	62.3675	0.0945502					471.304	0.0516442
895.305	39.7743	0.0229525				662.217	60.2607	0.227377				694.567	7.35678	0.011153					473.198	1.89039	y4
900.651	76.8069	0.0443229				663.19	55.7695	0.210431				695.548	119.497	0.18116					473.275	1.62333	y4
901.656	38.1014	0.0219872				664.133	30.3084	0.114361				696.446	92.022	0.139507					473.295	1.58531	y4
906.487	247.885	0.143047				666.053	9.51235	0.0358923				698.265	1354.48	2.05341					474.204	0.363549
907.414	82.7581	0.0477572				667.328	38.9925	0.147128				698.922	837.519	1.26969					474.308	0.116815
913.503	235.281	0.135773				668.261	4.90696	0.0185151				699.693	59.0065	0.0894549					474.327	0.0623042
923.313	640.581	0.36966				669.583	37.1769	0.140277				700.815	13.4042	0.020321					475.066	0.0382032
924.018	118.949	0.0686417				671.321	40.5236	0.152905				701.78	9.57424	0.0145147					475.784	0.0406425
924.769	192.033	0.110817				672.483	12.888	0.0486293				703.366	19.8334	0.0300678					477.172	0.0408275
930.253	31.5053	0.0181808				675.662	64.4437	0.243161				704.034	23.2257	0.0352106					479.211	0.104455
937.397	291.4	0.168158				678.086	28.8136	0.10872				705.357	131.727	0.1997					480.361	0.0177686
941.437	9139.63	5.2742				678.724	6.85576	0.0258683				706.298	66.5072	0.100826					481.124	0.0134322
942.518	1739.46	1.00379				680.068	80.0777	0.302151				707.467	16.2378	0.0246169					481.814	0.0191741
945.207	64.3454	0.0371318				681.308	220.288	0.831199				708.51	69.7684	0.10577					482.458	0.0107903
949.196	109.104	0.0629609				682.31	65.5725	0.24742				709.408	112.538	0.170609					483.261	0.0348519
952.797	26.2679	0.0151584				684.017	55.9417	0.211081				710.291	427.926	0.648743					483.277	0.016015
961.501	1113.03	0.642298				684.802	2.32116	0.00875826				711.401	115.843	0.175619					484.086	0.0147253
962.587	121.963	0.070381				685.571	2.7056	0.0102088				712.404	29.4612	0.0446637					484.168	0.0285035
971.471	103.97	0.0599979				686.812	41.2899	0.155796				713.885	119.291	0.180848					484.254	0.0214258
974.458	22.008	0.0127001				688.026	40.2358	0.151819				714.564	685.265	1.03887					485.294	0.0247412
979.204	11485.5	6.62794				689.265	144.512	0.545277				715.508	215.344	0.326466					485.321	0.0193705
980.355	1840.16	1.0619				689.986	30.4539	0.11491				716.13	10.0497	0.0152356					486.408	0.00778238
997.365	11.5559	0.00666857				692.055	90.5496	0.341664				716.949	84.7554	0.128491					488.272	0.101798
998.696	48.0736	0.0277418				692.898	89.7204	0.338536				717.806	102.902	0.156001					489.406	0.00665245
1006.95	100.603	0.0580552				694.158	36.7506	0.138668				718.452	32.1213	0.0486965					490.092	0.0569021
1008.35	95.144	0.0549047				695.422	35.9287	0.135567				719.599	83.243	0.126198					490.399	0.0121862
1009.6	87.466	0.050474				696.357	59.5916	0.224853				720.252	142.211	0.215594					492.123	0.0249119
1013.94	50.991	0.0294253				697.55	47.4848	0.179171				720.905	10.3343	0.015667					493.436	0.0329062
1018.54	458.923	0.26483				698.307	598.514	2.25833				721.506	27.8659	0.0422452					494.257	0.0725881
1019.41	171.382	0.0988994				699.198	71.3466	0.269207				722.872	47.2439	0.0716226					494.26	0.0323331
1025.06	82.0032	0.0473216				699.925	67.8224	0.255909				724.167	76.7418	0.116342					494.548	0.0190168
1034.61	125.633	0.072499				701.155	11.4148	0.0430706				725.47	150.065	0.227501					495.104	0.0965116
1036.25	2358.57	1.36106				701.965	25.505	0.0962362				726.596	29.8763	0.0452931					495.344	0.0429909
1037.58	168.662	0.09733				702.661	7.35762	0.027762				727.97	29.9378	0.0453863					496.286	0.0406392
1047.56	92.6171	0.0534465				703.437	44.1778	0.166693				728.63	206.458	0.312994					497.177	0.0494315
1052.43	149.541	0.0862957				704.909	122.716	0.463034				731	25.0351	0.0379536					500.112	0.0247268
1075.23	122.855	0.0708959				706.475	41.0014	0.154708				732.327	138.282	0.209638					501.135	0.0106417
1076.19	40.8184	0.0235551				707.698	16.2682	0.0613836				733.99	140.578	0.213119					501.522	0.0451439
1080.43	72.1129	0.0416142				708.882	47.0927	0.177692				734.988	173.829	0.263528					502.239	0.0226757
1093.26	1681.77	0.970498				709.541	34.4249	0.129893				736.313	684.754	1.0381					502.292	0.0255359
1094.39	308.159	0.177829				710.216	175.584	0.662518				737.505	1943.59	2.94651					503.346	0.019562
1110.3	89.8359	0.0518416				711.332	47.742	0.180141				738.23	3190.7	4.83716					504.173	0.0323555
1111.44	418.32	0.2414				712.356	42.5798	0.160663				739.174	1154.35	1.75002					505.276	0.0411145
1112.61	295.313	0.170416				714.359	368.559	1.39066				740.977	37.3985	0.0566967					506.395	0.0154234
1133.76	74.1529	0.0427914				715.505	13.4701	0.0508259				742.24	265.976	0.403224					507.504	0.0130966
1134.56	59.8525	0.0345391				716.57	136.911	0.516598				742.844	79.3068	0.120231					508.81	0.0118525
1135.7	7.22336	0.00416838				717.566	123.432	0.465739				743.53	114.374	0.173392					509.362	0.088371
1136.52	123.942	0.0715233				718.242	192.401	0.725974				744.542	193.313	0.293067					510.211	0.0398374
1143.58	72.3554	0.0417541				719.438	47.3895	0.178811				745.983	3972.19	6.02191					510.404	0.0462149
1146.33	835.8	0.482315				720.31	53.4859	0.201815				747.06	77.0845	0.116861					511.145	0.00765282
1147.32	110.7	0.0638816				721.547	150.057	0.566198				747.993	69.6137	0.105536					511.147	0.0342097
1151.7	84.2999	0.0486469				722.228	54.5018	0.205648				748.63	12.1208	0.0183754					512.32	0.210476
1154.67	91.4216	0.0527567				723.373	91.4124	0.34492				750.41	9.27165	0.014056					512.349	0.387047
1158.35	50.399	0.0290837				724.101	54.2896	0.204847				751.745	11.5654	0.0175334					512.398	0.283134
1160.81	23.7837	0.0137249				725.683	42.8369	0.161633				754.32	42.9923	0.0651771					513.318	0.0624754
1163.73	139.451	0.0804731				726.874	72.4624	0.273417				767.377	21.9288	0.0332445					513.414	0.138257
1164.4	3099.55	1.78866				727.897	66.2541	0.249992				771.341	2875.32	4.35904					514.467	0.0183881
1165.28	445.137	0.256875				729.305	84.389	0.318419				772.439	782.076	1.18564					518.13	0.0285937
1168.59	523.318	0.301991				729.961	6.45641	0.0243615				774.46	32.7712	0.0496817					518.314	0.0350742
1169.75	147.746	0.0852596				731.08	32.064	0.120985				776.697	82.5787	0.125191					520.105	0.0300916
1171.99	42.264	0.0243893				732.375	83.3336	0.314437				777.413	93.9896	0.14249					520.162	0.0242315
1181.38	471.348	0.272001				733.208	46.7235	0.176299				778.42	82.3452	0.124837					521.04	0.0115069
1207.37	471.426	0.272046				734.055	72.9701	0.275333				780.096	6.45092	0.00977971					522.267	0.00662375
1208.73	107.54	0.0620583				735.328	44.0248	0.166116				782.536	28.0499	0.0425242					524.185	0.0300663
1223.05	60.0115	0.0346308				736.125	479.731	1.81013				785.721	34.7138	0.0526267					524.415	0.0168356
1225.58	2051.95	1.18412				737.124	583.695	2.20241				786.37	26.8045	0.0406361					525.122	0.0859657
1226.54	362.81	0.209366				738.179	1497.08	5.64884				787.333	8.06389	0.012225					526.1	0.0268627
1277.42	59.5579	0.0343691				739.137	142.707	0.538468				795.22	685.553	1.03931					526.251	0.0573077
1278.87	33.4354	0.0192946				739.914	27.7013	0.104523				796.16	271.065	0.41094					526.419	0.205083
1297	16.8382	0.0097168				740.847	106.996	0.403722				796.987	51.2114	0.0776373					527.184	0.0384026
1316.43	1258.45	0.726211				741.63	18.8647	0.0711809				798.352	5.9824	0.00906943					528.409	0.0161471
1317.41	105.478	0.0608679				742.493	47.3528	0.178673				799.164	41.5712	0.0630227					530.214	7.96457	y5
1334.33	4772.94	2.75432				744.849	365.679	1.37979				804.556	5.39538	0.00817949					530.229	11.1428	y5
1335.42	796.9	0.459867				745.818	1031	3.89019				805.849	19.8476	0.0300893					530.254	9.67787	y5
1374.72	24.8099	0.0143171				746.511	44.4506	0.167722				810.157	20.0214	0.0303528					531.242	0.148042
1627.44	52.6833	0.0304019				747.744	27.0363	0.102014				811.228	19.4458	0.0294802					531.297	0.818424
1788.82	9.02145	0.00520601				749.938	7.97687	0.0300986				812.165	492.018	0.745908					531.301	1.4268
						753.512	10.0367	0.0378707				812.843	55.755	0.0845256					532.549	0.0546265
						754.242	3.34344	0.0126156				813.572	37.8241	0.0573421					533.274	0.0104356
						767.436	23.6035	0.0890613				814.644	19.819	0.0300459					534.394	0.0114232
						768.357	3.77668	0.0142503				816.487	4.67894	0.00709335					535.48	0.0374582
						771.36	1002.13	3.78125				818.418	21.9106	0.0332168					536.442	0.0375417
						772.134	33.6622	0.127015				820.536	8.75065	0.0132661					536.78	0.0112291
						772.936	71.3268	0.269132				833.436	9.85937	0.014947					539.4	0.0230499
						776.356	2.1614	0.00815547				837.012	58.4708	0.0886427					539.414	0.147864
						777.459	21.5327	0.0812477				841.138	23.4387	0.0355335					540.215	0.0082988
						778.425	42.2089	0.159264				847.895	43.0769	0.0653054					540.347	0.00273644
						779.388	11.6076	0.0437981				848.639	12.2993	0.018646					540.658	0.023856
						780.6	6.72466	0.0253737				850.317	54.565	0.0827214					541.493	0.0314476
						781.638	10.254	0.0386907				852.226	19.6625	0.0298087					542.379	0.0297692
						782.388	9.18819	0.0346692				852.963	40.9034	0.0620103					542.513	0.015079
						785.391	14.0479	0.0530059				853.683	2.24327	0.00340083					544.061	0.219952
						786.424	5.01819	0.0189348				855.06	5.9921	0.00908412					544.369	0.0311266	y5
						788.32	19.1209	0.0721477				856.217	31.0173	0.0470228					544.427	0.0731489	y5
						789.062	30.4364	0.114844				860.135	23.7304	0.0359757					544.809	0.0756628	y5
						790.086	41.6473	0.157145				863.022	95.61	0.144946					545.478	0.0462456
						791.376	20.4743	0.0772541				866.427	96.2302	0.145887					545.483	0.0197564
						794.574	82.2387	0.310306				868.272	13.1024	0.0198635					545.534	0.0617739
						795.45	152.716	0.576232				869.862	5.82052	0.00882401					547.709	0.00413095
						796.535	8.82847	0.0333118				871.277	36.7426	0.0557025					547.717	0.0172048
						797.395	54.6862	0.206344				872.981	52.0018	0.0788356					549.067	0.0281432
						798.188	24.396	0.0920515				876.26	19.6976	0.029862					549.285	0.00766641
						800.413	10.1699	0.0383735				879.268	7.88049	0.011947					550.175	0.236547
						801.856	7.97396	0.0300876				881.435	5.1791	0.00785161					550.344	0.367595
						802.953	21.976	0.0829203				882.478	22.8452	0.0346338					550.453	0.222318
						803.582	2.58125	0.00973965				884.481	547.795	0.830468					551.127	0.00856951
						809.704	66.4712	0.250811				885.546	250.783	0.380191					551.176	0.047877
						812.263	230.762	0.870719				889.783	74.7282	0.113289					551.806	0.0193369
						813.388	20.6602	0.0779558				891.731	40.0985	0.06079					552.366	0.0408737
						815.877	1.80909	0.0068261				895.786	16.9294	0.0256652					552.75	0.0434259
						816.581	11.0662	0.0417551				898.66	35.6049	0.0539777					554.047	0.00528044
						821.051	50.1262	0.189138				900.805	23.3966	0.0354696					554.44	0.121201
						822.403	5.91971	0.0223364				904.34	46.718	0.0708254					555.104	0.0430008
						825.237	22.4836	0.0848358				905.588	35.3785	0.0536344					555.172	0.0313657
						827.432	10.8882	0.0410836				906.521	49.5036	0.0750483					556.191	0.0150907
						828.076	3.13243	0.0118194				907.718	11.449	0.0173569					556.251	0.102503
						830.57	11.7437	0.0443118				909.224	10.7477	0.0162937					556.303	0.265581
						831.658	29.5591	0.111533				910.246	6.9904	0.0105976					557.016	0.0932124
						832.338	37.3398	0.140892				916.281	22.4798	0.0340798					557.019	0.039402
						833.731	4.11239	0.015517				917.701	11.2957	0.0171245					557.206	0.0275394
						835.458	35.2164	0.132879				919.683	23.375	0.0354369					558.375	0.006744
						841.098	18.5268	0.0699059				923.505	163.34	0.247627					560.276	0.0250623
						844.9	16.2629	0.0613636				924.49	90.5667	0.137301					560.471	0.0661016
						848.712	7.02817	0.0265189				928.182	44.8895	0.0680532					560.652	0.0149115
						850.062	43.9932	0.165996				931.9	6.5129	0.00987368					561.18	0.00351282
						851.295	3.4845	0.0131478				934.983	41.9009	0.0635225					562.231	0.0636554
						853.096	6.23571	0.0235287				937.714	76.721	0.11631					562.283	0.0205376
						854.704	1.98037	0.00747239				941.476	2729.33	4.13771					562.353	0.0121364
						855.973	14.5211	0.0547915				942.575	769.015	1.16584					562.899	0.0389992
						857.055	51.3333	0.193692				943.646	45.0696	0.0683263					563.303	0.037645
						859.733	20.4273	0.0770768				946.87	6.41886	0.0097311					564.647	0.016875
						862.213	6.57064	0.0247925				956.548	10.5218	0.0159512					565.157	0.0132373
						863.299	4.83379	0.018239				958.302	12.9011	0.0195584					565.389	0.0421431
						866.378	21.6987	0.0818743				958.906	8.49485	0.0128783					565.469	0.0242277
						868.087	45.6861	0.172384				961.259	319.852	0.484901					566.224	0.0875472
						869.316	7.42468	0.028015				962.254	97.3148	0.147531					566.275	0.0275205
						880.304	9.08525	0.0342807				962.967	94.2489	0.142883					567.475	0.116683
						881.572	12.4724	0.0470614				964.772	25.4849	0.0386355					568.068	2.45425	b5
						882.284	25.4043	0.0958561				965.509	34.9292	0.0529533					568.086	2.08164	b5
						883.808	19.5646	0.0738216				966.471	29.1895	0.0442518					568.146	1.57387	b5
						884.466	192.619	0.726796				967.508	5.71495	0.00866396					568.68	0.0879723
						885.402	18.5307	0.0699206				969.247	38.6056	0.0585268					569.159	0.424863
						886.221	16.3776	0.0617964				971.721	13.8347	0.0209737					569.283	0.391541
						887.218	6.19572	0.0233779				972.692	67.6043	0.102489					569.304	0.196467
						890.66	5.87557	0.0221699				979.188	3685.85	5.58781					570.104	0.0474636
						891.816	1.83603	0.00692776				980.25	944.836	1.43239					570.366	0.0485571
						894.387	14.3273	0.0540603				981.035	9.60492	0.0145612					570.968	0.0289879
						895.753	65.8403	0.24843				982.761	12.938	0.0196143					571.432	0.0392754
						898.471	9.33113	0.0352085				983.448	16.6913	0.0253043					571.464	0.00631119
						900.026	9.41346	0.0355191				985.945	4.88711	0.00740894					572.182	0.0193299
						902.51	28.3137	0.106834				986.611	10.9044	0.0165313					572.569	0.0273374
						904.405	16.7475	0.0631922				988.162	9.80334	0.014862					572.98	0.00400656
						906.033	30.1603	0.113802				992.168	8.5256	0.012925					573.225	0.0338607
						906.709	30.915	0.116649				1000.02	11.1341	0.0168795					573.898	0.00896105
						907.874	47.0076	0.17737				1000.83	26.5776	0.0402921					575.521	0.00311944
						909.197	34.1985	0.129039				1005.24	15.4955	0.0234915					575.642	0.0282973
						910.359	17.4462	0.0658283				1006.07	21.956	0.0332857					575.923	0.0911199
						911.949	8.97655	0.0338706				1008.45	7.20744	0.0109266					576.24	0.0847059
						914.329	22.3849	0.0844635				1010.53	3.67944	0.00557809					577.053	0.0176262
						915.968	12.6102	0.0475811				1011.21	14.6444	0.0222012					577.055	0.0216796
						917.951	8.11105	0.0306048				1012.12	40.8579	0.0619413					577.239	0.0202025
						923.558	105.415	0.397756				1018.47	123.533	0.187278					579.299	0.0433487
						924.85	21.8243	0.0823482				1019.41	115.003	0.174347					579.375	0.0157713
						927.365	12.0822	0.0455888				1025.37	19.9625	0.0302635					580.192	0.0590154
						928.181	9.77951	0.0369003				1026.18	29.4316	0.0446188					580.253	0.043187
						932.08	8.4667	0.0319468				1027.74	7.8056	0.0118334					580.374	0.0560261
						932.906	5.1145	0.0192982				1031.34	35.2079	0.0533758					581.008	0.0848887
						936.602	33.9481	0.128094				1032.9	30.3254	0.0459738					581.519	0.00764387
						937.34	30.3806	0.114633				1033.61	12.0375	0.0182491					581.849	0.048035
						938.48	31.9212	0.120446				1035.12	12.538	0.0190078					582.21	0.0134817	b5
						941.519	1047.07	3.95083				1036.19	913.36	1.38467					582.484	0.0657943	b5
						942.649	34.2691	0.129305				1037.37	201.805	0.30594					584.17	0.0714295
						943.925	33.452	0.126222				1039.33	11.8111	0.0179058					584.721	0.435578
						946.175	3.92038	0.0147925				1044.18	4.57753	0.00693961					584.747	0.774412
						950.491	16.6089	0.0626691				1046.17	18.6611	0.0282906					585.009	0.602157
						951.824	6.68314	0.025217				1048.24	15.3136	0.0232157					585.384	0.145069
						955.278	29.2338	0.110306				1051.44	72.9645	0.110616					585.645	0.094286
						958.946	8.09006	0.0305257				1052.07	27.0932	0.0410738					586.06	0.0902198
						961.488	142.183	0.536489				1052.69	22.1258	0.0335431					586.903	0.0171877
						963.057	10.866	0.0410001				1065.95	25.339	0.0384144					587.14	0.0336792
						964.487	36.7273	0.138581				1067.61	12.713	0.0192731					587.276	0.12412
						965.436	14.3052	0.0539767				1072.28	31.1355	0.047202					588.199	0.0140566
						967.43	19.871	0.0749777				1074.6	19.2464	0.0291778					588.749	0.0199187
						969.766	7.16584	0.0270384				1075.52	17.4178	0.0264058					589.116	0.0206123
						972.901	6.53341	0.0246521				1076.63	6.64316	0.0100712					590.781	0.0208217
						979.22	1401.51	5.28822				1084.4	2.60018	0.00394192					591.07	0.14474
						980.25	54.9252	0.207245				1089.65	5.5365	0.00839342					592.278	0.028137
						981.611	34.299	0.129418				1092.19	19.7211	0.0298975					592.784	0.0204068
						982.678	7.40743	0.0279499				1093.24	393.618	0.596732					594.754	0.0558287
						986.412	2.20713	0.00832802				1094.36	128.877	0.19538					594.984	0.15827
						991.694	3.30665	0.0124768				1098.11	30.3262	0.045975					595.713	0.0172691
						996.542	12.1832	0.0459699				1104.38	4.63706	0.00702987					595.717	0.0297176
						998.566	12.7375	0.0480615				1111.4	160.675	0.243587					597.228	0.016431
						999.652	6.29209	0.0237415				1112.01	96.461	0.146237					597.233	0.110741
						1004.32	2.21072	0.00834155				1112.72	62.7563	0.0951397					597.346	0.134747
						1005.34	8.9588	0.0338036				1114.6	36.3287	0.0550749					598.261	0.0170655
						1008.03	9.11301	0.0343855				1118.1	7.15599	0.0108486					598.283	0.0402083
						1008.73	2.76478	0.0104321				1118.74	11.6878	0.0177188					599.006	0.139259
						1009.71	16.1174	0.0608146				1130.5	7.7341	0.011725					599.972	0.031307
						1012.98	23.7474	0.0896043				1133.84	33.0485	0.0501022					600.112	0.0365093
						1018.39	44.0448	0.166191				1134.85	14.9881	0.0227223					600.794	0.0107629
						1019.27	35.327	0.133297				1136.44	26.2356	0.0397736					601.388	0.0495036
						1025.32	23.1912	0.0875056				1146.4	110.489	0.167503					602.198	0.0276497
						1026.03	14.3465	0.0541327				1147.08	9.91285	0.0150281					602.919	0.0337817
						1029.56	8.65215	0.0326466				1147.7	40.5396	0.0614588					604.314	0.207956
						1030.35	9.4638	0.0357091				1149.21	14.3475	0.021751					604.339	0.406946
						1033.29	15.9401	0.0601458				1151.04	29.0381	0.0440223					604.39	0.267212
						1036.25	288.709	1.08936				1152.1	45.0634	0.0683169					605.014	0.0769009
						1037.08	25.2826	0.0953971				1162.53	12.647	0.0191731					605.838	0.100282
						1038.81	18.9099	0.0713513				1164.19	656.952	0.995951					606.066	0.0230133
						1039.81	9.04678	0.0341355				1165.43	297.109	0.450422					606.765	0.0491549
						1041.54	32.1063	0.121144				1168.44	114.855	0.174122					607.163	0.0782567
						1044.02	69.2968	0.261473				1169.67	107.861	0.163519					607.334	0.132113
						1045.26	13.6152	0.0513732				1177.05	9.52566	0.0144411					607.482	0.112939
						1046.47	2.18391	0.0082404				1180.22	9.73517	0.0147587					608.109	0.0856517
						1048.38	20.8101	0.0785213				1181.05	54.5239	0.0826591					608.144	0.0190667
						1051.25	30.6695	0.115723				1181.93	25.3042	0.0383615					609.316	0.0431981
						1052.43	2.74073	0.0103414				1182.64	57.7432	0.0875397					610.128	0.0322946
						1057.72	12.7102	0.0479583				1186.42	12.2471	0.0185669					610.162	0.0675428
						1060.15	7.56734	0.0285533				1195.55	8.00874	0.0121414					610.366	0.0279883
						1062.14	10.6283	0.0401031				1204.55	16.9568	0.0257068					610.931	0.0124016
						1067.81	10.8308	0.0408672				1205.53	12.052	0.0182711					611.001	0.0300615
						1071.35	2.95054	0.0111331				1207.61	98.5264	0.149368					611.2	0.0151522
						1072.54	7.77869	0.0293508				1208.6	67.4779	0.102298					611.654	0.122956
						1088.5	14.7736	0.0557441				1221.62	37.4362	0.0567539					612.255	0.0305525
						1090.5	6.84459	0.0258262				1225.57	366.308	0.55533					612.292	0.0107518
						1093.36	148.764	0.561321				1226.56	239.643	0.363304					613.343	2.03232
						1094.36	1.9085	0.00720121				1227.27	26.7343	0.0405297					613.36	3.66576
						1098.65	7.3041	0.02756				1234.67	7.71018	0.0116888					613.423	2.39098
						1101.96	8.00485	0.0302041				1274.34	7.6547	0.0116047					614.303	0.00765587
						1109.41	6.76397	0.025522				1276.15	2.57354	0.00390154					614.498	0.0497523
						1111.57	73.3484	0.27676				1291.1	23.2483	0.0352449					614.567	0.121829
						1120.32	2.06643	0.0077971				1292.21	16.8594	0.0255592					615.256	0.0146101
						1122.65	2.69322	0.0101621				1293.42	8.60205	0.0130409					615.592	0.0450968
						1123.39	17.289	0.0652355				1294.37	7.81835	0.0118528					615.636	0.0268701
						1127.5	13.9744	0.0527287				1298.13	9.65703	0.0146402					616.309	0.00818943
						1129.56	4.49305	0.0169533				1301.66	6.33789	0.00960835					617.046	0.0248874
						1131.13	16.9887	0.0641022				1308.38	36.425	0.0552209					617.291	0.0763455
						1135.41	22.0843	0.083329				1316.38	118.203	0.179198					617.901	0.0097228
						1136.87	9.63085	0.0363394				1317.49	101.348	0.153646					618.389	0.019716
						1138.43	6.47503	0.0244318				1320.41	3.59949	0.00545689					619.142	0.0211355
						1146.32	41.892	0.158068				1333.61	58.6064	0.0888483					619.419	0.0559831
						1146.95	2.35591	0.00888937				1334.38	1298.65	1.96878					619.736	0.148987
						1148.17	9.59509	0.0362045				1335.53	761.644	1.15467					620.366	0.0233849
						1150.72	2.58307	0.00974651				1345.32	15.774	0.0239137					620.4	0.0420042
						1155.45	8.51219	0.0321184				1370.7	32.6481	0.049495					620.813	0.0657544
						1158.18	16.2319	0.0612468				1375.22	3.60329	0.00546265					621.773	0.0457703
						1160.24	20.1678	0.0760977				1725.42	9.35848	0.0141876					622.313	0.0392641
						1163.67	51.83	0.195566				1955.87	5.67048	0.00859655					623.384	0.0285374
						1164.37	364.147	1.37401											624.588	0.231681
						1165.41	14.1811	0.0535086											625.133	3.21873	b6
						1167.36	6.87524	0.0259419											625.209	2.82799	b6
						1168.59	105.346	0.397495											625.267	2.08507	b6
						1177.43	16.6269	0.0627371											626.095	0.496026
						1179.99	5.11832	0.0193126											626.263	0.651211
						1181.41	12.5896	0.0475036											626.278	0.00521248
						1184.74	6.84415	0.0258245											626.973	0.00928581
						1186.08	6.08936	0.0229766											627.049	0.162364
						1190.63	17.8064	0.0671876											627.225	0.0296665
						1192.95	37.0809	0.139915											628.945	0.0415183
						1193.75	21.7847	0.0821988											629.399	0.129604
						1203.49	5.51654	0.0208152											630.074	0.0266132
						1207.69	55.4204	0.209114											630.385	0.0441132
						1217.91	14.1799	0.0535038											631.392	0.202739
						1218.58	2.86545	0.010812											631.424	0.0625991
						1221.19	5.10724	0.0192708											632.995	0.00719421
						1225.7	278.711	1.05164											633.008	0.0371395
						1226.62	35.1159	0.1325											633.605	0.00390447
						1234.62	6.55434	0.024731											634.091	0.106011
						1235.8	6.47174	0.0244193											634.961	0.0465113
						1238.51	9.76198	0.0368342											635.023	0.101546
						1243.86	6.51617	0.024587											635.911	0.0498353
						1278.6	13.9621	0.0526824											636.395	0.0574467
						1294.44	3.96627	0.0149656											636.749	0.051615
						1297.28	10.3372	0.0390048											637.327	0.00794078
						1300.46	19.0598	0.0719168											637.388	0.02051
						1303.43	24.7987	0.0935712											638.441	0.0494767
						1304.65	5.6663	0.0213803											639.318	0.0716129	b6
						1305.27	8.8912	0.0335485											639.383	0.0415771	b6
						1314.54	18.1104	0.0683348											640.343	0.123589
						1316.61	50.9513	0.192251											640.346	0.00892977
						1332.57	6.7922	0.0256285											642.47	0.0649197
						1334.31	485.556	1.83211											642.974	0.0545898
						1335.33	35.0349	0.132195											643.164	0.01532
						1401.61	21.4861	0.081072											644.574	0.0301301
						1530.37	6.70702	0.0253071											645.277	0.011802
						1753.55	16.2074	0.0611543											645.307	0.0164551
						1973.87	1.85125	0.0069852											645.32	0.0847445
																			646.753	0.0233561
																			647.552	0.00789251
																			648.021	0.041028
																			648.546	0.113746
																			649.346	0.0525548
																			650.015	0.249247
																			650.316	0.05674
																			650.564	0.0795696
																			651.752	0.186797
																			652.512	0.00444425
																			652.557	0.0690457
																			653.3	0.128797
																			655.064	0.0578461
																			655.272	0.0707576
																			655.634	0.0182123
																			656.68	0.0431192
																			659.29	0.0103691
																			659.39	0.00899708
																			660.134	0.034491
																			660.392	0.0393737
																			661.124	0.0271115
																			661.614	0.0319702
																			662.217	0.227377
																			662.268	0.0322129
																			663.19	0.210431
																			663.212	0.0831499
																			663.215	0.0385729
																			664.133	0.114361
																			664.2	0.0228376
																			664.453	0.0207365
																			665.841	0.0250623
																			666.053	0.0358923
																			667.328	0.147128
																			667.351	0.0182475
																			668.261	0.0185151
																			668.533	0.165291
																			669.583	0.140277
																			670.068	0.019956
																			670.76	0.010419
																			671.321	0.152905
																			672.101	0.0327008
																			672.483	0.0486293
																			673.394	0.0104969
																			675.662	0.243161
																			675.689	0.0696505
																			676.541	0.00508172
																			678.086	0.10872
																			678.22	0.126865
																			678.608	0.029336
																			678.724	0.0258683
																			679.387	0.0154428
																			679.66	0.0585724
																			680.068	0.302151
																			680.262	0.0460887
																			680.475	0.0800688
																			681.271	0.386281
																			681.308	0.831199
																			681.353	0.177884
																			682.31	0.24742
																			682.532	0.0439588
																			683.073	0.199127
																			684.017	0.211081
																			684.802	0.00875826
																			685.381	0.00903042
																			685.571	0.0102088
																			686.446	0.0733844
																			686.812	0.155796
																			687.219	0.00563031
																			687.875	0.0358296
																			688.026	0.151819
																			688.579	0.0327721
																			689.265	0.545277
																			689.487	0.617528
																			689.675	0.164576
																			689.986	0.11491
																			690.474	0.0811432
																			691.506	0.0312278
																			692.055	0.341664
																			692.228	0.0263005
																			692.397	0.0427649
																			692.898	0.338536
																			693.87	0.0945502
																			694.158	0.138668
																			694.262	0.238275
																			694.567	0.011153
																			695.297	0.0318033
																			695.422	0.135567
																			695.548	0.18116
																			696.357	0.224853
																			696.44	0.375284
																			696.446	0.139507
																			697.55	0.179171
																			697.586	0.0956966
																			698.265	2.05341
																			698.307	2.25833
																			698.422	2.6841
																			698.922	1.26969
																			699.198	0.269207
																			699.544	0.0842653
																			699.693	0.0894549
																			699.925	0.255909
																			700.815	0.020321	y6
																			701.155	0.0430706	y6
																			701.78	0.0145147
																			701.965	0.0962362
																			702.312	0.0522269
																			702.661	0.027762
																			703.366	0.0300678
																			703.437	0.166693
																			704.034	0.0352106
																			704.909	0.463034
																			705.357	0.1997
																			705.962	0.0473706
																			706.298	0.100826
																			706.475	0.154708
																			707.467	0.0246169
																			707.698	0.0613836
																			708.51	0.10577
																			708.882	0.177692
																			709.408	0.170609
																			709.541	0.129893
																			709.639	0.24878
																			710.216	0.662518
																			710.245	0.775865
																			710.291	0.648743
																			711.288	0.182715
																			711.332	0.180141
																			711.401	0.175619
																			712.356	0.160663
																			712.404	0.0446637
																			712.837	0.0409277
																			713.885	0.180848
																			714.359	1.39066	y6
																			714.432	2.02886	y6
																			714.564	1.03887	y6
																			715.505	0.0508259
																			715.508	0.326466
																			715.651	0.23414
																			716.13	0.0152356
																			716.354	0.00830541
																			716.57	0.516598
																			716.949	0.128491
																			717.566	0.465739
																			717.806	0.156001
																			717.979	0.152567
																			718.242	0.725974
																			718.452	0.0486965
																			719.083	0.0987506
																			719.438	0.178811
																			719.599	0.126198
																			720.15	0.26269
																			720.252	0.215594
																			720.31	0.201815
																			720.905	0.015667
																			721.249	0.012365
																			721.506	0.0422452
																			721.547	0.566198
																			722.228	0.205648
																			722.451	0.0608256
																			722.872	0.0716226
																			723.373	0.34492
																			723.645	0.0580052
																			724.101	0.204847
																			724.167	0.116342
																			724.315	0.0466262
																			725.47	0.227501
																			725.632	0.143402
																			725.683	0.161633
																			726.596	0.0452931
																			726.874	0.273417
																			727.333	0.0596965
																			727.897	0.249992
																			727.97	0.0453863
																			728.149	0.143436
																			728.63	0.312994
																			729.305	0.318419
																			729.928	0.0206202
																			729.961	0.0243615
																			731	0.0379536
																			731.08	0.120985
																			731.868	0.249747
																			732.327	0.209638
																			732.375	0.314437
																			732.483	0.111965
																			733.208	0.176299
																			733.214	0.0167761
																			733.99	0.213119
																			734.055	0.275333
																			734.988	0.263528
																			735.328	0.166116
																			736.125	1.81013
																			736.313	1.0381
																			736.328	0.315891
																			737.124	2.20241
																			737.136	1.54789
																			737.505	2.94651
																			738.139	6.91352	b7
																			738.179	5.64884	b7
																			738.23	4.83716	b7
																			739.137	0.538468
																			739.174	1.75002
																			739.305	0.793675
																			739.914	0.104523
																			740.847	0.403722
																			740.977	0.0566967
																			741.128	0.0168671
																			741.63	0.0711809
																			742.188	0.062886
																			742.24	0.403224
																			742.493	0.178673
																			742.844	0.120231
																			742.939	0.167692
																			743.53	0.173392
																			743.844	0.0422209
																			744.542	0.293067
																			744.849	1.37979
																			745.818	3.89019
																			745.862	3.98602
																			745.983	6.02191
																			746.511	0.167722
																			746.521	0.231569
																			747.06	0.116861
																			747.744	0.102014
																			747.966	0.0479063
																			747.993	0.105536
																			748.63	0.0183754
																			748.649	0.0310712
																			749.938	0.0300986
																			750.41	0.014056
																			751.745	0.0175334
																			753.512	0.0378707
																			753.66	0.0154363
																			754.242	0.0126156
																			754.32	0.0651771
																			767.285	0.0486424
																			767.377	0.0332445
																			767.436	0.0890613
																			768.357	0.0142503
																			771.341	4.35904	y7
																			771.356	5.60154	y7
																			771.36	3.78125	y7
																			772.134	0.127015
																			772.439	1.18564
																			772.507	0.475432
																			772.936	0.269132
																			774.46	0.0496817
																			776.356	0.00815547
																			776.697	0.125191
																			777.413	0.14249
																			777.448	0.208145
																			777.459	0.0812477
																			778.23	0.0490748
																			778.42	0.124837
																			778.425	0.159264
																			779.388	0.0437981
																			780.096	0.00977971
																			780.6	0.0253737
																			781.638	0.0386907
																			782.388	0.0346692
																			782.536	0.0425242
																			785.147	0.0247192
																			785.391	0.0530059
																			785.721	0.0526267
																			786.37	0.0406361
																			786.424	0.0189348
																			787.333	0.012225
																			788.32	0.0721477
																			789.062	0.114844
																			790.086	0.157145
																			791.376	0.0772541
																			794.574	0.310306
																			795.167	1.78671	b8
																			795.22	1.03931	b8
																			795.45	0.576232	b8
																			796.16	0.41094
																			796.264	0.202833
																			796.535	0.0333118
																			796.987	0.0776373
																			797.395	0.206344
																			798.188	0.0920515
																			798.352	0.00906943
																			799.164	0.0630227
																			800.128	0.0065454
																			800.413	0.0383735
																			801.856	0.0300876
																			802.953	0.0829203
																			803.582	0.00973965
																			804.556	0.00817949
																			805.849	0.0300893
																			806.138	0.0186184
																			809.704	0.250811
																			810.125	0.0256575
																			810.157	0.0303528
																			811.228	0.0294802
																			812.165	0.745908
																			812.263	0.870719
																			812.265	0.836646
																			812.843	0.0845256
																			813.339	0.0880141
																			813.388	0.0779558
																			813.572	0.0573421
																			814.644	0.0300459
																			815.877	0.0068261
																			816.487	0.00709335
																			816.581	0.0417551
																			818.418	0.0332168
																			820.15	0.0127996
																			820.536	0.0132661
																			821.051	0.189138
																			821.454	0.0155332
																			822.403	0.0223364
																			825.237	0.0848358
																			827.432	0.0410836
																			828.076	0.0118194
																			828.142	0.0211315
																			830.57	0.0443118
																			831.658	0.111533
																			832.338	0.140892
																			833.436	0.014947
																			833.731	0.015517
																			835.458	0.132879
																			837.012	0.0886427
																			837.941	0.00741056
																			841.098	0.0699059
																			841.138	0.0355335
																			842.26	0.0116329
																			844.9	0.0613636
																			845.143	0.137427
																			847.32	0.0166317
																			847.895	0.0653054
																			848.639	0.018646
																			848.712	0.0265189
																			849.526	0.00413499
																			850.062	0.165996
																			850.317	0.0827214
																			850.513	0.0518787
																			851.295	0.0131478
																			852.226	0.0298087
																			852.963	0.0620103
																			853.096	0.0235287
																			853.683	0.00340083
																			854.704	0.00747239
																			855.06	0.00908412
																			855.973	0.0547915
																			856.217	0.0470228
																			857.055	0.193692
																			859.733	0.0770768
																			860.135	0.0359757
																			862.213	0.0247925
																			862.566	0.107882
																			863.022	0.144946
																			863.299	0.018239
																			866.233	0.165291
																			866.378	0.0818743
																			866.427	0.145887
																			868.087	0.172384
																			868.272	0.0198635
																			868.659	0.0326817
																			869.316	0.028015
																			869.862	0.00882401
																			871.277	0.0557025
																			872.981	0.0788356
																			875.777	0.0566205
																			876.26	0.029862
																			879.268	0.011947
																			880.304	0.0342807
																			881.435	0.00785161
																			881.572	0.0470614
																			881.641	0.00871776
																			882.284	0.0958561
																			882.478	0.0346338
																			883.808	0.0738216
																			884.456	1.36697	y8
																			884.466	0.726796	y8
																			884.481	0.830468	y8
																			885.402	0.0699206
																			885.546	0.380191
																			885.684	0.154403
																			886.221	0.0617964
																			887.218	0.0233779
																			889.783	0.113289
																			890.66	0.0221699
																			891.387	0.0257225
																			891.731	0.06079
																			891.816	0.00692776
																			894.123	0.0123132
																			894.387	0.0540603
																			895.305	0.0229525
																			895.753	0.24843
																			895.786	0.0256652
																			898.471	0.0352085
																			898.66	0.0539777
																			900.026	0.0355191
																			900.651	0.0443229
																			900.805	0.0354696
																			901.656	0.0219872
																			902.51	0.106834
																			904.34	0.0708254
																			904.405	0.0631922
																			905.588	0.0536344
																			906.033	0.113802
																			906.487	0.143047
																			906.521	0.0750483
																			906.709	0.116649
																			907.414	0.0477572
																			907.718	0.0173569
																			907.874	0.17737
																			909.197	0.129039
																			909.224	0.0162937
																			910.246	0.0105976
																			910.359	0.0658283
																			911.949	0.0338706
																			913.503	0.135773
																			914.329	0.0844635
																			915.968	0.0475811
																			916.281	0.0340798
																			917.701	0.0171245
																			917.951	0.0306048
																			919.683	0.0354369
																			923.313	0.36966
																			923.505	0.247627
																			923.558	0.397756
																			924.018	0.0686417
																			924.49	0.137301
																			924.769	0.110817
																			924.85	0.0823482
																			927.365	0.0455888
																			928.181	0.0369003
																			928.182	0.0680532
																			930.253	0.0181808
																			931.9	0.00987368
																			932.08	0.0319468
																			932.906	0.0192982
																			934.983	0.0635225
																			936.602	0.128094
																			937.34	0.114633
																			937.397	0.168158
																			937.714	0.11631
																			938.48	0.120446
																			941.437	5.2742	y9
																			941.476	4.13771	y9
																			941.519	3.95083	y9
																			942.518	1.00379
																			942.575	1.16584
																			942.649	0.129305
																			943.646	0.0683263
																			943.925	0.126222
																			945.207	0.0371318
																			946.175	0.0147925
																			946.87	0.0097311
																			949.196	0.0629609
																			950.491	0.0626691
																			951.824	0.025217
																			952.797	0.0151584
																			955.278	0.110306
																			956.548	0.0159512
																			958.302	0.0195584
																			958.906	0.0128783
																			958.946	0.0305257
																			961.259	0.484901
																			961.488	0.536489
																			961.501	0.642298
																			962.254	0.147531
																			962.587	0.070381
																			962.967	0.142883
																			963.057	0.0410001
																			964.487	0.138581
																			964.772	0.0386355
																			965.436	0.0539767	b9
																			965.509	0.0529533	b9
																			966.471	0.0442518
																			967.43	0.0749777
																			967.508	0.00866396
																			969.247	0.0585268
																			969.766	0.0270384
																			971.471	0.0599979
																			971.721	0.0209737
																			972.692	0.102489
																			972.901	0.0246521
																			974.458	0.0127001
																			979.188	5.58781	b9
																			979.204	6.62794	b9
																			979.22	5.28822	b9
																			980.25	0.207245
																			980.25	1.43239
																			980.355	1.0619
																			981.035	0.0145612
																			981.611	0.129418
																			982.678	0.0279499
																			982.761	0.0196143
																			983.448	0.0253043
																			985.945	0.00740894
																			986.412	0.00832802
																			986.611	0.0165313
																			988.162	0.014862
																			991.694	0.0124768
																			992.168	0.012925
																			996.542	0.0459699
																			997.365	0.00666857
																			998.566	0.0480615
																			998.696	0.0277418
																			999.652	0.0237415
																			1000.02	0.0168795
																			1000.83	0.0402921
																			1004.32	0.00834155
																			1005.24	0.0234915
																			1005.34	0.0338036
																			1006.07	0.0332857
																			1006.95	0.0580552
																			1008.03	0.0343855
																			1008.35	0.0549047
																			1008.45	0.0109266
																			1008.73	0.0104321
																			1009.6	0.050474
																			1009.71	0.0608146
																			1010.53	0.00557809
																			1011.21	0.0222012
																			1012.12	0.0619413
																			1012.98	0.0896043
																			1013.94	0.0294253
																			1018.39	0.166191
																			1018.47	0.187278
																			1018.54	0.26483
																			1019.27	0.133297
																			1019.41	0.0988994
																			1019.41	0.174347
																			1025.06	0.0473216
																			1025.32	0.0875056
																			1025.37	0.0302635
																			1026.03	0.0541327
																			1026.18	0.0446188
																			1027.74	0.0118334
																			1029.56	0.0326466
																			1030.35	0.0357091
																			1031.34	0.0533758
																			1032.9	0.0459738
																			1033.29	0.0601458
																			1033.61	0.0182491
																			1034.61	0.072499
																			1035.12	0.0190078
																			1036.19	1.38467	b10
																			1036.25	1.08936	b10
																			1036.25	1.36106	b10
																			1037.08	0.0953971
																			1037.37	0.30594
																			1037.58	0.09733
																			1038.81	0.0713513
																			1039.33	0.0179058
																			1039.81	0.0341355
																			1041.54	0.121144
																			1044.02	0.261473
																			1044.18	0.00693961
																			1045.26	0.0513732
																			1046.17	0.0282906
																			1046.47	0.0082404
																			1047.56	0.0534465
																			1048.24	0.0232157
																			1048.38	0.0785213
																			1051.25	0.115723
																			1051.44	0.110616
																			1052.07	0.0410738
																			1052.43	0.0103414
																			1052.43	0.0862957
																			1052.69	0.0335431
																			1057.72	0.0479583
																			1060.15	0.0285533
																			1062.14	0.0401031
																			1065.95	0.0384144
																			1067.61	0.0192731
																			1067.81	0.0408672
																			1071.35	0.0111331
																			1072.28	0.047202
																			1072.54	0.0293508
																			1074.6	0.0291778
																			1075.23	0.0708959
																			1075.52	0.0264058
																			1076.19	0.0235551
																			1076.63	0.0100712
																			1080.43	0.0416142
																			1084.4	0.00394192
																			1088.5	0.0557441
																			1089.65	0.00839342
																			1090.5	0.0258262
																			1092.19	0.0298975
																			1093.24	0.596732	b11
																			1093.26	0.970498	b11
																			1093.36	0.561321	b11
																			1094.36	0.00720121
																			1094.36	0.19538
																			1094.39	0.177829
																			1098.11	0.045975
																			1098.65	0.02756
																			1101.96	0.0302041
																			1104.38	0.00702987
																			1109.41	0.025522
																			1110.3	0.0518416
																			1111.4	0.243587	y10
																			1111.44	0.2414	y10
																			1111.57	0.27676	y10
																			1112.01	0.146237
																			1112.61	0.170416
																			1112.72	0.0951397
																			1114.6	0.0550749
																			1118.1	0.0108486
																			1118.74	0.0177188
																			1120.32	0.0077971
																			1122.65	0.0101621
																			1123.39	0.0652355
																			1127.5	0.0527287
																			1129.56	0.0169533
																			1130.5	0.011725
																			1131.13	0.0641022
																			1133.76	0.0427914
																			1133.84	0.0501022
																			1134.56	0.0345391
																			1134.85	0.0227223
																			1135.41	0.083329
																			1135.7	0.00416838
																			1136.44	0.0397736
																			1136.52	0.0715233
																			1136.87	0.0363394
																			1138.43	0.0244318
																			1143.58	0.0417541
																			1146.32	0.158068
																			1146.33	0.482315
																			1146.4	0.167503
																			1146.95	0.00888937
																			1147.08	0.0150281
																			1147.32	0.0638816
																			1147.7	0.0614588
																			1148.17	0.0362045
																			1149.21	0.021751
																			1150.72	0.00974651	b12
																			1151.04	0.0440223	b12
																			1151.7	0.0486469
																			1152.1	0.0683169
																			1154.67	0.0527567
																			1155.45	0.0321184
																			1158.18	0.0612468
																			1158.35	0.0290837
																			1160.24	0.0760977
																			1160.81	0.0137249
																			1162.53	0.0191731
																			1163.67	0.195566
																			1163.73	0.0804731
																			1164.19	0.995951	b12
																			1164.37	1.37401	b12
																			1164.4	1.78866	b12
																			1165.28	0.256875
																			1165.41	0.0535086
																			1165.43	0.450422
																			1167.36	0.0259419
																			1168.44	0.174122	y11
																			1168.59	0.397495	y11
																			1168.59	0.301991	y11
																			1169.67	0.163519
																			1169.75	0.0852596
																			1171.99	0.0243893
																			1177.05	0.0144411
																			1177.43	0.0627371
																			1179.99	0.0193126
																			1180.22	0.0147587
																			1181.05	0.0826591
																			1181.38	0.272001
																			1181.41	0.0475036
																			1181.93	0.0383615
																			1182.64	0.0875397
																			1184.74	0.0258245
																			1186.08	0.0229766
																			1186.42	0.0185669
																			1190.63	0.0671876
																			1192.95	0.139915
																			1193.75	0.0821988
																			1195.55	0.0121414
																			1203.49	0.0208152
																			1204.55	0.0257068
																			1205.53	0.0182711
																			1207.37	0.272046
																			1207.61	0.149368
																			1207.69	0.209114
																			1208.6	0.102298
																			1208.73	0.0620583
																			1217.91	0.0535038
																			1218.58	0.010812
																			1221.19	0.0192708
																			1221.62	0.0567539
																			1223.05	0.0346308
																			1225.57	0.55533	y12
																			1225.58	1.18412	y12
																			1225.7	1.05164	y12
																			1226.54	0.209366
																			1226.56	0.363304
																			1226.62	0.1325
																			1227.27	0.0405297
																			1234.62	0.024731
																			1234.67	0.0116888
																			1235.8	0.0244193
																			1238.51	0.0368342
																			1243.86	0.024587
																			1274.34	0.0116047
																			1276.15	0.00390154
																			1277.42	0.0343691
																			1278.6	0.0526824
																			1278.87	0.0192946
																			1291.1	0.0352449
																			1292.21	0.0255592
																			1293.42	0.0130409
																			1294.37	0.0118528
																			1294.44	0.0149656
																			1297	0.0097168
																			1297.28	0.0390048
																			1298.13	0.0146402
																			1300.46	0.0719168
																			1301.66	0.00960835
																			1303.43	0.0935712
																			1304.65	0.0213803
																			1305.27	0.0335485
																			1308.38	0.0552209
																			1314.54	0.0683348
																			1316.38	0.179198
																			1316.43	0.726211
																			1316.61	0.192251
																			1317.41	0.0608679
																			1317.49	0.153646
																			1320.41	0.00545689
																			1332.57	0.0256285
																			1333.61	0.0888483
																			1334.31	1.83211	b13
																			1334.33	2.75432	b13
																			1334.38	1.96878	b13
																			1335.33	0.132195
																			1335.42	0.459867
																			1335.53	1.15467
																			1345.32	0.0239137
																			1370.7	0.049495
																			1374.72	0.0143171
																			1375.22	0.00546265
																			1401.61	0.081072
																			1530.37	0.0253071
																			1627.44	0.0304019
																			1725.42	0.0141876
																			1753.55	0.0611543
																			1788.82	0.00520601
																			1955.87	0.00859655
																			1973.87	0.0069852
