# Supplementary material for: Sumoylation of the human histone H4 tail inhibits p300-mediated transcription by RNA polymerase II in cellular extracts
Source: eLife journal article supplement (doi:10.7554/elife.67952), 2021-11-08

**Figure 1 – Source Data**

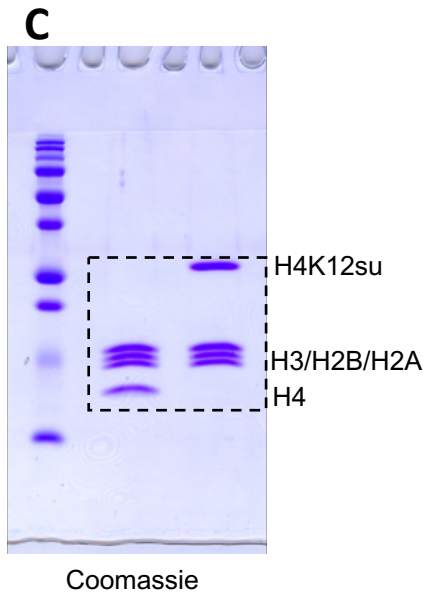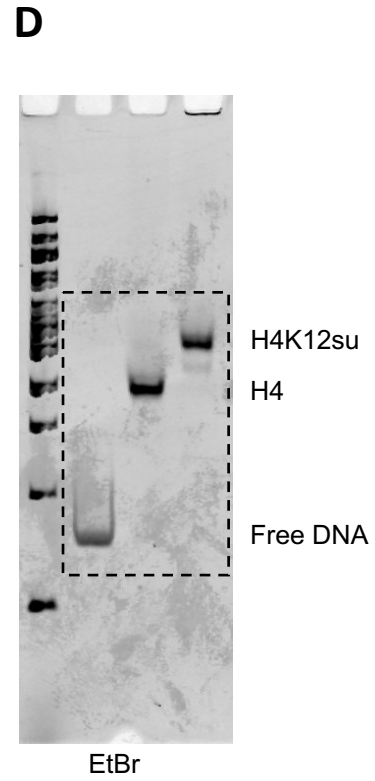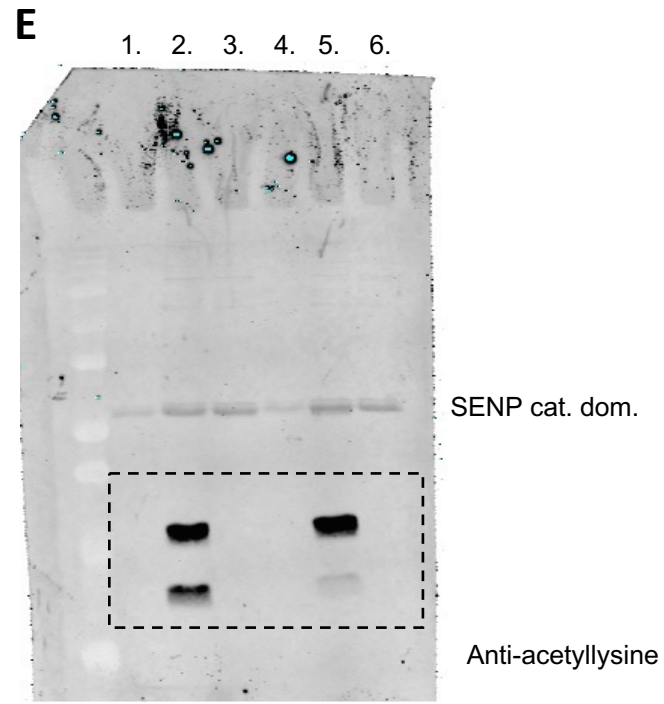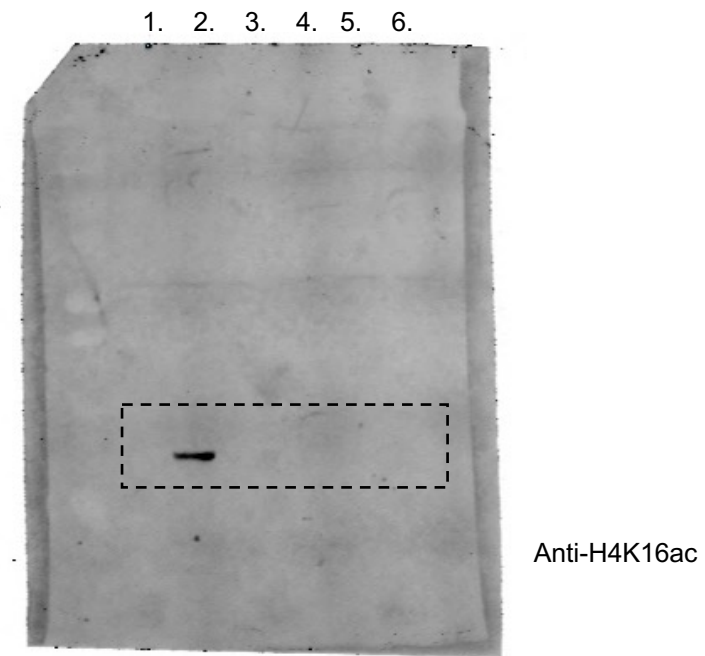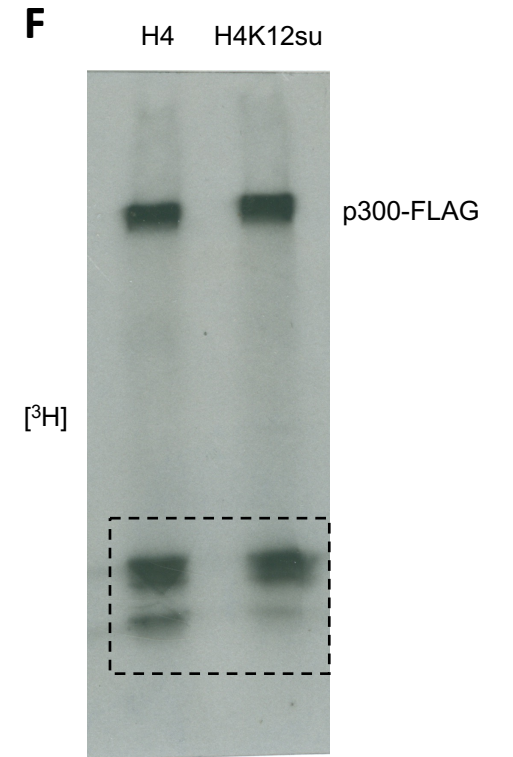

Supplement: supp [file elife-67952-supp-v1.zip]
